# Supplementary material for: Lesula: A New Species of Cercopithecus Monkey Endemic to the Democratic Republic of Congo and Implications for Conservation of Congo’s Central Basin
Source: PLoS One. 2012 Sep 12;7(9):e44271. doi: 10.1371/journal.pone.0044271 (PMC3440422; doi:10.1371/journal.pone.0044271)
Supplement: Matrix S1 — DNA sequence alignment for TSPY. (NEX) [file pone.0044271.s017.nex]

#NEXUS 

BEGIN DATA;
	DIMENSIONS  NTAX=28 NCHAR=2298;
	FORMAT DATATYPE=DNA  MISSING=? GAP=- ;
MATRIX
[                                           10        20        30        40        50        60        70        80        90        100       110       120       130       140       150       160       170       180       190       200       210       220       230       240       250       260       270       280       290       300       310       320       330       340       350       360       370       380       390       400       410       420       430       440       450       460       470       480       490       500       510       520       530       540       550       560       570       580       590       600       610       620       630       640       650       660       670       680       690       700       710       720       730       740       750       760       770       780       790       800       810       820       830       840       850       860       870       880       890       900       910       920       930       940       950       960       970       980       990       1000      1010      1020      1030      1040      1050      1060      1070      1080      1090      1100      1110      1120      1130      1140      1150      1160      1170      1180      1190      1200      1210      1220      1230      1240      1250      1260      1270      1280      1290      1300      1310      1320      1330      1340      1350      1360      1370      1380      1390      1400      1410      1420      1430      1440      1450      1460      1470      1480      1490      1500      1510      1520      1530      1540      1550      1560      1570      1580      1590      1600      1610      1620      1630      1640      1650      1660      1670      1680      1690      1700      1710      1720      1730      1740      1750      1760      1770      1780      1790      1800      1810      1820      1830      1840      1850      1860      1870      1880      1890      1900      1910      1920      1930      1940      1950      1960      1970      1980      1990      2000      2010      2020      2030      2040      2050      2060      2070      2080      2090      2100      2110      2120      2130      2140      2150      2160      2170      2180      2190      2200      2210      2220      2230      2240      2250      2260      2270      2280      2290    ]
[                                           .         .         .         .         .         .         .         .         .         .         .         .         .         .         .         .         .         .         .         .         .         .         .         .         .         .         .         .         .         .         .         .         .         .         .         .         .         .         .         .         .         .         .         .         .         .         .         .         .         .         .         .         .         .         .         .         .         .         .         .         .         .         .         .         .         .         .         .         .         .         .         .         .         .         .         .         .         .         .         .         .         .         .         .         .         .         .         .         .         .         .         .         .         .         .         .         .         .         .         .         .         .         .         .         .         .         .         .         .         .         .         .         .         .         .         .         .         .         .         .         .         .         .         .         .         .         .         .         .         .         .         .         .         .         .         .         .         .         .         .         .         .         .         .         .         .         .         .         .         .         .         .         .         .         .         .         .         .         .         .         .         .         .         .         .         .         .         .         .         .         .         .         .         .         .         .         .         .         .         .         .         .         .         .         .         .         .         .         .         .         .         .         .         .         .         .         .         .         .         .         .         .         .         .         .         .         .         .         .         .         .         .         .         .         .         .         .         .         .         .         .         .         .         .         .         .         .         .         .       ]

C_mitis_C_Lehn                    AAGATGGAGCGGAGGCGCAAGCCCCACCTGGACCGCAGAGGCGCCATCATCCAGAGCATGCCTGGCTTCTGGGCCAATGTTGTATCCTTTGCAGTGTTTCTTCTGCTTTTCCAGTTGAGAGGTGCTCTTGGGAAGTGTAAGGAACTTACGGGCGGCTCGGCGTCGATGTGACCATTTGGGGAACGAGGGTGAGTTTCCACAGACAAATGTGGCTGAAGAAAGCCAGAGCAGACACGGGTACTATTCTCCTGCGTGCGTGAGAGAAACGCTTCATGGTGCCAAGCAGCAGACGTTTGGGGCATCTTTCTGAAGAGCAGAAGCGAGTTCTCGGCAGMGCACGTGTTGCTGTGAATCAAGCTATTGTTAAGGGACTGTGACTGCTCCGCCTTGCCAGTCCGATCCGGGACTGGGCTTCTTCGGGTATGAGCAGATTCTGCCAGGCCTCAGACACCGGCAGTTCTCTGCATATCGCCCCTCCCGGTGTCAGT------GCGGTCAGCCTCGCAATGATACACCCTCGGTGAAACCCGAGAGGTCTGAATTCAGGGGGAGGGAGAGGAGAAAGGGAGGTCGTTCATGGATGCAGATCTGAAAAAATCCCCTAACCGCCCCTCTGGGTGCTCTTAGGCCTTCCCCGTTGCTTGTAGCT---TTTCTTCCCATTGCATCTCAAGGCTCTTTGACCTCAGTCAGATTGCAAACCACCCTCAGATGTCAGCCCTGATCACTGACCAAGATGAAGACATGCTGAGCTACCTGATCAACTTGGAGGTGAGGCCGGGAAGACTAAGGCTGGAGGGTTGAGTGGGGGAGGCTAAGGGAGATAATTTATTCCTGCAAGCAACAGTGGGCACCTCACCCAAAAAGGTGTTTAAGCTTTCTCCACCTTGTCCTGACAGGTGAAAGAAGCGAAGCATCCCGTTCATCTCTGCCAGATCATGTTGTTCTTTCGGAGTAACCCCTACTTCCAGAATAAAGTGATTACCAAGGAATATCTCGTGAACGTCACAGGTGACAGGTGGCTCCCAGGATGGGTAGTGGAAGGAGGAAGGTGGGTGGATCAGTGCCAACGTGTTCCAGCCCCCTTGCCAAAACATCCTCTGTCTGTAGAATACAGGGCTTCTCATTCCACTCCAATTCAGTGGTGTCAGGATTATGAAGTTGAGGCCTATCGCCGCAGACACAACAACAGCGGTCTTAACTTCTTCAACTGGTTTTCTGACCACAACTTCGCAGGATCCAATAGGATTGCTGAGGTGGGTCCTTGCTGGGAAACGTGAGGAATGACCCCGGTGTGTTCCCAGCTGCTTGGGTCACCAGTCTGAGCTCTCATGAGGCCTTTTCCGATTGATTCCCC-TGACAGATCCTATGTAAGGACCTGTGGCGCAATCCCCTGCAATACTACAGGAGGATGAAGCCACCTGARGASKAAACAGAGATTTCAGGTGAGCCGKACAGTTGGAACCGGAGCTGTCTGATAACCCAGGATAAGGGTGTTGACACACCTCTCTATTCAGGGAGCCTGGAGGCTCATTTCAGAAATGTAGAACCTGGGGGTCCGTCTTATCCATGTCGAAATTCCTTGAGAGGAAGACACAGCATGACAGAAGCCAGGACATTCATGGCATTGGG-CTGAAAAAGGCACATGAGACACTGCACTGCAAAGCAGGTTATAACTGTGGAGTCTTAAGCCCAGGGAAGCATAGTGCGTGTCCACACTCAC----------------------------------------------TGAGAAGTAAAGCCGAGTTATTAACTTCAATCTGTGGCACTTGGTTCCATGGCCGTCAACCCGACGGGGAGTCATCTTACCAACCCCTAAAGCTTGGGCTCCCCGAATGTGCCTGGTTGTCCTCCTTGCCACAGACCACAAAGGACTGCTTAGATCCATGGATTTT-CTGAAGCTATTACCCCATCGGATTTCCGTGTGCTTTTAGTGTACAACGCGTCTTGTTAGCTGACTCCTGTCACAGAGAATACTGGAAATGGGGCAGGTATTGCAGAGAATAGTTTGTAACACATGCGTGGTAGGAGGAAGTTGAAGAGATCACAAAAGGGG--AAGGGGTAGTCTTTTCTCAGCAGGCCGTAAAATTAAAACATTTTAAATGGTGGCTCAGAGGAGATGCATTTT-GACATGTGTTTGTGTTTCTCTAGGGAACGCGCAGATGTTGGGTTGAATATGATGGAGCATCGGACACGGGTGCTGTGTTCACCTAACACGGCAGAACTCCTGAAAACTTACTACAGTATGC   
C_nictitans_Newton                AAGATGGAGCGGAGGCGCAAGCCCCACCTGGACCGCAGAGGCGCCATCATCCAGAGCATGCCTGGCTTCTGGGCCGATGTTGTATCCTTTGCAGTGTTTCTTCTGCTTTTCCAGTTGAGAGGTGCTCTTGGGAAGTGTAAGGAACTTACGGGCGGCTCGGCGTCGATGTGACCATTTGGGGAACGAGGGTGAGTTTCCACAGACAAATGTGGCTGAAGAAAGCCAGAGCAGACACGGGTACTATTTTCCTGCGTGCGTGAGAGAAACGCTTCATGGTGCCAAGCAGCAGACGTTTGGGGCATCTTTCTGAAGAGCAGAAGCCACTTCTCGGCAGAGCACGTGTTGCTGTGAATCAAGCTATTGTTAAGGGACTGTGACTGCTCCGCCTTGCCAGTCCGATCCGGGACTGGGCTTCTTCGGGTATGAGCGGATTCTGCCAGGCCTCAGACACCGGCAGTTCTCTGCATATCGCCCCTCCCGGTGTCAGT------GCGGTCAGCCTCGCAATGATACACCCTCGGTGAAACCCGAGAGGTCTGAATTCAGGGGGAGGGAGAGGAGAAAGGGAGGTCGTTCATGGATGCAGATCTGAAAAAATCCCCTAACCGCCCCTCTGGGTGCTCTTAGGCCTTCCCCGTTGCTTCTAGCT---TTTCTTCCCATTGCATCTCAAGGCTCTTTGACCTCAGTCAGATTGCAAACCACCCTCAGATGTCAGCCCTGATCACTGACCAAGATGAAGACATGCTGAGCTACCTGATCAACTTGGAGGTGAGGCCGGGATGACTAAGGCTGGAGGGTTGAGTGGGGGAGGCTAAGGGAGATAATTTATTCCTGCAAGCAACAGTGGGCACCTCACCCAAAAAGGTGTTTAAGCTTTCTCCACCTTGTCCTGACAGGTGAAAGAAGCGAAGCATCCCGTTCATCTCTGCCAGATCATGTTGTTCTTTCGGAGTAACCCCTACTTCCAGAATAAAGTGATTACCAAGGAATATCTCGTGAACGTCACAGGTGACAGGTGGCTCCCAGGATGGGTAGTGGAAGGAGGAAGGTGGGTGGATCAGTGCCAACGTGTTCCAGCCCCCTTGCCAAAACATCCTCTGTCTGTAGAATACAGGGCTTCTCATTCCACTCCAATTCAGTGGTGTCAGGATTATGAAGTTGAGGCCTATCGCCGCAGACACAACAACAGCGGTCTTAACTTCTTCAACTGGTTTTCTGACCACAACTTCGCAGGATCCAATAGGATTGCTGAGGTGGGTCCTTGCTGGGAAACGTGAGGAATGACCCCGGTGTGTTCCCAGCTGCTTGGGTCACCAGTCTGAGCTCTCATGAGGCCTTTTCCGATTGATTCCCC-TGACAGATCCTATGTAAGGACCTGTGGCGCAATCCCCTGCAATACTACAGGAGGATGAAGCCACCTGAAGAGGAAACAGAGATTTCAGGTGAGCCGTACAGTTGGAACCGGAGCTGTCTGATAACCCAGGATAAGGGTGTTGACACACCTCTCTATTCAGGGAGCCTGGAGGCTCATTTCAGAAATGTAGAACCTGGGGGTCCGTCTTATCCATGTCGAAATTCCTTGAGAGGAAGACACAGCATGACAGAAGCCAGGACATTCATGGCATTGGG-CTGAAAAAGGCACATGAGACACTGCACTGCAAAGCAGGTTATAACTGTGGAGTCTTAAGCCCAGGGAAGCATAGTGCGTGTCCACACTCAC----------------------------------------------TGAGAAGTAAAGCCGAGTTATTAACTTCAATCTGTGGCACTTGGTTCCATGGCCGTCAACCCGACGGGGAGTCATCTTACCAACCCCTAAACCTTGGGCTCCCCGAATGCGCCTGGTTGTCCTCCTTGCCACAGACCACAAAGGACTGCTTAGATCCATGGATTTT-CTGAAGCTATTACCCCATCGGATTTCCGTGTGCTTTTAGTGTACAACGCGTCTTGTTAGCTGACTCCTGTCACAGAGAATACTGGAAATGGGGCAGGTATTGCAGAGAATAGTTTGTAACACATGCATGGTAGGAGGAAGTTGAAGAGATCACAAAAGGGG--AAGGGGTAGTCTTTTCTCAGCAGGCCGTAAAATTAAAACATTTTAAATGGTGGCTCAGAGGAGATGCATTTT-GACATGTGTTTGTGTTTCTCTAGGGAACGCGCAGATGTTGGGTTGAATATGATGGAGCATCGGACACGGGTGCTGTGTTCACCTAACACGGCAGAACTCCTGAAAACTTACTACAGTATGC   
C_cephus_The_Zoo_1                AAGATGGAGCGGAGGCGCAAGCCCCACCTGGACCGCAGAGGCGCCATCATCCAGAGCATGCCTGGCTTCTGGGCCAATGTTGTATCCTTTGCAGTGTTTCTTCTGCTTTTCCAGTTGAGAGGTGCTCTTGGGAAGTGTAAGGCACTTACGGGCGGCTCGGCGTCGATGTGACCATTTGGGGAACGAGGGTGAGTTTCCACAGACAGATGTGGCTGAAGAAAGCCAGAGCAGACACGGGTACTATTTTCCTGCGTGCGTGAGAGAAACGCTTCATGGTGCCAAGCAGCAGACGTTTGGGGCATCTTTCTGAAGAGCAGAAGCGAGTTCTCGGCAGAACACGTGTTGCTGTGAATCAAGCTATTGTTAAGGGACTGTGACTGCTCCGCCTTGCCAGTCCGATCCGGGACTGGGCTTCTTCGGGTATGAGCAGATTCTGCCAGGCCTCAGACACCGGCAGTTCTCTGCATATCGCCCCTCCCGGTGTCAGT------GCGGTCAGCCTCGCAATGATACACCCTGGGTGAAACCCGAGAGGTCTGAATTCAGGGGGAGGGAGAGGAGAAAGGGAGGTCGTTCATGGATGCAGATCTGAAAAAATCCCCTAACCGCCCCTCTGGGTGCTCTTAGGCCTTCCCCGTTGCTTCTAGCT---TTTCTTCCCATTGCATCTCAAGGCTCTTTGACCTCAGTCAGATTGCAAACCACCCTCAGATGTCAGCCCTGATCACTGACCAAGATGAAGACATGCTGAGCTACCTGATCAACTTGGAGGTGAGGCCGGGAAGACTAAGGCTGGAGGGTTGAGTGGGGGAGGCTAAGGGAGATAATTTATTCCTGCAAGCAACAGTGGGCACCTCACCCAAAAAGGTGTTTAAGCTTTCTCCACCTTGTCCTGACAGGTGAAAGAAGCGAAGCATCCCGTTCATCTCTGCCAGATCATGTTGTTCTTTCGGAGTAACCCCTACTTCCAGAATAAAGTGATTACCAAGGAATATCTCGTGAACGTCACAGGTGACAGGTGGCTCCCAGGATGGGTAGTGGAAGGAGGAAGGTGGGTGGATCAGTGCCAACGTGTTCCAGCCCCCTTGCCAAAACATCCTCTGTCTGTAGAATACAGGGCTTCTCATTCCACTCCAATTCAGTGGTGTCAGGATTATGAAGTTGAGGCCTATCGCCGCAGACACAACAACAGCGGTCTTAACTTCTTCAACTGGTTTTCTGACCACAACTTCGCAGGATCCAATAGGATTGCTGAGGTGGGTCCTTGCTGGGAAACGTGAGGAATGACCCCGGTGTGTTCCCAGCTGCTTGGGTCACCAGTCTGAGCTCTCATGAGGCCTTTTCCGATTGATTCCCC-TGACAGATCCTATGTAAGGACCTGTGGCGCAATCCCCTGCAATACTACAGGAGGATGAAGCCACCTGAAGAGGAAACAGAGATTTCAGGTGAGCCGTACAGTTGGAACCGGAGCTGTCTGATAAGCCAGGATAAGGGTGTTGACACACCTCTCTATTCAGGGAGCCTGGAGGCTCATTTCAGAAATGTAGAACCTGGGGGTCCGTCTTATCCATGTCGAAATTCCTTGAGAGGAAGACACAGCACGACAGAAGCCAGGACATTCATGGCATTGGG-CTGAAAAAGGCACATGAGACACTGCACTGCAAAGCAGGTTATAACTGTGGAGTCTTAAGCCCAGGGAAGCATAGTGCGTGTCCACACTCAC----------------------------------------------TGAGAAGTAAAGCCGAGTTATTAACTTCAATCTGTGGCACTTGGTTCCATGGCCGTCAACCCCACGGGGAGTCATCTTACCAACCCCTAAAGCTTGGGCTCCCCGAATGTGCCTGGTTGTCCTCCTTGCCACAGACCACAAAGGACTGCTTAGATCCATGGATTTT-CTGAAGCTATTACCCCACCGGATTTCCGTGTGCTTTTAGTGTACAACGCGTCTTGTTAGCTGACTCCTGTCACAGAGAATACTGGAAATGGGGCAGGTATTGCAGAGAATAGTTTGTAACACATGCATGGTAGGAGGAAGTTGAAGAGATCACAAAAGGGG--AAGGGGTAGTCTTTTCTCAGCAGGCCGTAAAATTAAAACATTTTAAATGGTGGCTCAGAGGAGATGCATTTT-GACATGTGTTTGTGTTTCTCTAGGGAACGCGCAGATGTTGGGTTGAATATGATGGAGCATCGGACACGGGTGCTGTGTTCACCTAACACGGCAGAACTCCTGAAAACTTACTACAGTATGC   
C_mona_SA_BF_3                    AAGATGGAGCGGAGGCGCAAGCCCCACCTGGACCGCAGAGGCGCCATCATCCAGAGCATGCCTGGCTTCTGGGCCAATGTTGTATCCTTTGCAGTGTTTCTTCTGCTTTTCCAGTTGAGAGGTGCTCTTGGGAAGTGTAAGGAACTTACGGGCGGCTCGGCGTCGATGTGACCATTTGGGGAACGAGGGTGAGTTTCCACAGACAAATGTGGCTGAAGAAAGCCAGAGCAGACACGGGTACTGTTTTCCTGCGTGCGTGAGAGAAACGCTTCATGGTGCCAAGCAGCAGACGTTTGGGGCATCTTTCTGAAGAGCAGAAGCGAGTTCTCGGCAGAACACGTGTTGCTGTGAATCAAGCTGTTGTTAAGGGACTGTGACTGCTCCGCCTTGCCAGCCCGATCCGGGACTGGGCTTCTTCGGGTATGAGCAGATTCTGCCAGGCCTCAGACACCGGCAGTTCTCTGCATATCGCCCCTCCCGGTGTCAGT------GCGGTCAGCCTGGCAATGATACCGCCTCGGTGAAACCCGAGAGGTCTGAATTCAGGGGGAGGGAGAGGAGAAAGGGAGGTCGTTCATGGATGCAGGTCTGAAAAAATCCCCTAACCGCCCCTCTGGGTGCTCTTAGGCCTTCCCCGTTGCTTCTAGCT---TTTCTTCCCATTGCATCTCAAGGCTCTTTGACCTCAGTCAGATTGCAAACCACCCTCAGATGTCAGCCCTGATCACTGACCAAGATGAAGACATGCTGAGCTACCTGATCAACTTGGAGGTGAGGCCGGGAAGACTAAGGCTGGAGGGTTGAGTGGGGGAGGCTAAGGGAGATAATTTATTCCTGCAAGCAACAGTGGGCACCTCACCCAAAAAGGTGTTTAAGCTTTCTCCACCTTGTCCTGACAGGTGAAAGAAGCGAAGCATCCCGTTCATCTCTGCCAGATCACGTTGTTCTTTCGGAGTAACCCCTACTTCCAGAATAAAGTGATTACCAAGGAATATCTCGTGAACGTCACAGGTGACAGGTGGCTCCCAGGATGGGTAGTGGAAGGAGGAAGGTGGGTGGATCAGTGCCAACGTGTTCCAGCCCCCTTGCCAAAACATCCTCTGTCTGTAGAATACAGGGCTTCTCATTCCACTCCAATTCAGTGGTGTCAGGATTATGAAGTTGAGGCCTATCGCCGCAGACACAACAACAGCGGTCTTAACTTCTTCAACTGGTTTTCTGACCACAACTTCGCAGGATCCAGTAGGATTGCTGAGGTGGGTCCTTGCTGGGAAACGTGAGGAATGACCCCGGTGTGTTCCCAGCTGCTTGGGTCACCAGTCTGAGCTCTCATGAGGCCTTTTCCGATTGATTCCCC-TGACAGATCCTATGTAAGGACCTGTGGCGCAATCCCCTGCAATACTACAGGAGGATGAAGCCACCTGAAGAGGAAACAGAGATTTCAGGTGAGCCGTACAGTTGGAACCGGAGCTGTCTGATA-CCCAGGATAAGGGTGTTGACACACCTCTCTATTCTGGGAGCCTGGAGGCTCATTTCAGAAATGTAGAACCTGGGGGTCCGTCTTATCCATGTCGAAATTCCTTGAGAGGAAGACACAGCATGACAGAAGCCAGGACATTCATGGCATTGGG-CTGAAAAAGGCACATGAGACACTGCACTGCAAAGCAGGTTATAACTGTGGAGTCTTAAGCCCAGGGAAGCATAGTGCGTGTCCACACTCAC----------------------------------------------TGAGAAGTAAAGCCGAGTTATTAACTTCAATCTGTGGCACTTGGTTCCATGGCCGTCAACCCGACGGGGAGTCATCTTACCAACCCCTAAAGCTTGGGCTCCCCGAATGTGCCTGGTTGTCCTCCTTGCCACAGACCACAAAGGACTGCTTAGATCCATGGATTTT-CTGAAGCTATTACCCCATCGGATTTCCGTGTGCTTTTAGTGTACAAGGCGTCTTGTTAGCTGACTCCTGTCACAGAGAATACTGGAAATGGGGCAGGTATTGCAGAGAATAGTTTGTAACACATGCATGGTAGGAGGAAGTTGAAGAGATCACAAAAGGGG--AAGGGGTAGTCTTTTCTCAGCAGGCCGTAAAATTAAAACATTTTAAATGGTGGCTCAGAGGAGATGCATTTT-GACATGTGTTTGTGTTTCTCTAGGGAACGCGCAGATGTTGGGTTGAATATGATGGAGCATCGGACACGGGTGCTGTGTTCACCTAACACGGCAGAACTCCTGAAAACTTACTACAGTATGC   
C_wolfi_Nguma                     AAGATGGAGCGGAGGCGCAAGCCCCACCTGGACCGCAGAGGCGCCATCATCCAGAGCATGCCTGGCTTCTGGGCCAATGTTGTATCCTTTGCAGTGTTTCGTCTGCTTTTCCAGTTGAGAGGTGCTCTTGGGAAGTGTAAGGAACTTACGGGCGGCTCGGCCTCGATGTGACCATTTGGGGAACGAGGGTGAGTTTCCACAGACAAATGTGGCTGAAGAAAGCCAGAGCAGACACGGGTACTATTTTCCTGCGTGCGTGAGAGAAACGCTTCATGGTGCCAAGCAGCAGACGTTTGGGGCATCTTTCTGAAGAGCAGAAGCGAGTTCTCGGCAGAACACGTGTTGCTGTGAATCAAGCTATTGTTAAGGGACTGTGACTCCTCCGCCTTGCCAGTCCGATCCGGGACTGGGCTTCTTCGGGTATGAGCAGATTCTGCCAGGCCTCAGACACCGGCAGTTCTCTGCATATCGCCCCTCCCGGTGTCAGT------GCGGTCAGCCTGGCAATGATACCCCCTCGGTGAAACCCGAGAGGTCTGAATTCAGGGGGAGGCAGAGGAGAAAGGGAGGTCGTTCATGGATGCAGGTCTGAAAAAATCCCCTAACCGCCCCTCTGGGTGCTCTTAGGCCTTCCCCGTTGCTTCTAGCT---TTTCTTCCCATTGCATCTCAAGGCTCTTTGACCTCAGTCAGATTGCAAACCACCCTCAGATGTCAGCCCTGATCACTGACCAAGATGAAGACATGCTGAGCTACCTGATCAACTTGGAGGTGAGGCCGGGAAGACTAAGGCTGGAGGGTTGAGTCGGGGAGGCTAAGGGAGATAATTTATTCCTGCAAGCAACAGTGGGCACCTCACCCAAAAAGGTGTTTAAGCTTTCTCCACCTTGTCCTGACAGGTGAAAGAAGCGAAGCATCCCGTTCATCTCTGCCAGATCATGTTGTTCTTTCGGAGTAACCCCTACTTCCAGAATAAAGTGATTACCAAGGAATATCTCGTCAACGTCACAGGTGACAGGTGGCTCCCAGGATGGGTAGTGGAAGGAGGAAGGTGGGTGGATCAGTGCCAACGTGTTCCAGCCCCCTTGCCAAAACATCCTCTGTCTGTAGAATACAGGGCTTCTCATTCCACTCCAATTCAGTGGTGTCAGGATTATGAAGTTGAGGCCTATCGCCGCAGACACAACAGCAGCGGTCTTAACTTCTTCAACTGGTTTTCTGACCACAACTTCGCAGGATCCAATAGGATTGCTGAGGTGGGTCCTCGCTGGGAAACGTGAGGAATGACCCCGGTGTGTTCCCAGCTGCTTGGGTCACCAGTCTGAGCTCTCATGAGGCCTTTTCCGATTGATTCCCC-TGACAGATCCTATGTAAGGACCTGTGGCGCAATCCCCTGCAATACTACAGGAGGATGAAGCCACCTGAAGAGGAAACAGAGATTTCAGGTGAGCCGTTCAGTTGGAACCGGAGCTTTCCGATA-CCCAGGATAAGGGTGTTGACACACCTCTCTATTCTGGGAGCCTGGAGGCTCATTTCAGAAATGTAGAACCTGGGGGTCCGTCTTATCCATGTCGAAATTCCTTGAGAGGAAGACACAGCATGACAGAAGCCAGGACATTCATGGCATTGGG-CTGAAAAAGGCACATGAGACACTGCACTGCAAAGCAGGTTATAACTGTGGAGTCTTAAGCCCAGGGAAGCATAGTGCGTGTCCACACTCAC----------------------------------------------TGAGAAGTAAAGCCGAGTTATTAACTTCAATCTGTGGCACTTGGTTCCATGGCCGTCAACCCGACGGGGAGTCATCTTACCAACCCCTAAAGCTTGGGCTCCCCGAATGTGCCTGGTTGTCCTCCTTGCCACAGACCACAAAGGACTGCTTAGATCCATGGATTTT-CTGAAGCTATTACCCCATCGGATTTCCGTGTGCTTTTAGTGTACAACGCGTCTTGTTAGCTGACTCCTGTCACAGAGAATACTGGAAATGGGGCAGGTATTGCAGAGAATAGTTTGTAACACATGCATGGTAGGAGGAAGTTGAAGAGATCACAAAAGGGG--AAGGGGTAGTCTTTTCTCAGCAGGCCGTAAAATTAAAACATTTTAAATGGTGGCTCAGAGGAGATGCATTTT-GACATGTGTTTGTGTTTCTCTAGGGAACGCGCAGATGTTGGGTTGAATATGATGGAGCATCGGACACGGGTGCTGTGTTCACCTAACACGGCAGAACTCCTGAAAACTTACTACCGTATGC   
C_solatus_Ombue                   AAGATGGAGCGGAGGCGCAAGCCCCACCTGGACCGCAGAGGCGCCATCATCCAGAGCATGCCTGGCTTCTGGGCCAATGTTGTATCCTTTGCAGTGTTTCTTCTGCTTTTCCAGTTGAGAGGTGCTCTTGGGAAGTGTAAGGAACTTACGGGCGGCTCGGCGTCGATGTGACCATTTGGGGAACAAGGGTGGGTTTCCACAGACAAATGTGGCTGAAGAAAGCCAGAGCAGACACGGGTACTATTTTCCTGCGTGCGTGAGAGAAACGCTTCATGGTGCCAAGCAGCAGACGTTTGGGGCATCTTTCCCAAGAGCAGAAGCGAGTTCTCAGCAGAACACGTGTTGCTGTGAATCAAGCTATTGTTAAGGGACTGTGGCTGCTCCGCCTTGCCAGTCCGATCCGGGACTGGGCTTCTTCGGGTATGAGCAGATTCTGCCAGGCCTCAGACAGCGGCAGTTCTCTGCATATCGCCCCTCCCCGTGTCAGT------GCGGTCAGCCTCACAATGACACACCCTCGGTGAAACCCGAGAGGTCTGAATTCAGGGGGAGGGAGAGGAGAAAGGGAGGTCATTCATGGATGCAGATCTGAAAAAATCCCCTAACCGCCCCTCTGGGTGCTCTTAGGCCTTCCCCGTTGCTTCTAGCT---TTTCTTTCCATTGCATCTCAAGGCTCTTTGACCTCAGTCAGATTGCAAACCACCCTCAGATGTCAGCCCTGATCACTGACCAAGATGAAGACATGCTGAGCTACATGATCAACTTGGAGGTGAGGCCGGGAAGACTAAGGCTGGMGGGTTGAGTGGGGGAGGCCAAGGGAGATAATTTCTTCCTGCAAGCAACAGTGGGCACCTCACCCAAAAAGGTGTTTAAGCTTTCTCCGCCTTGTCCTGACAGGTGAAAGAAGCGAAGCATCCCGTTCATCTCTGCCAGATCATGTTGTTCTTTCGGAGTAACCCCTACTTCCAGAATAAAGTGATTACCAAGGAATATCTCGTGAACGTCACAGGTGACAGGTGGCTCCCAGGATGGGTAGTGGAAGGAGGAAGGTGGGTGGATCAGTGCCAACGTGTTCCAGCCCCCTTACCAAAACGTCCTCTGTCTGTAGAATACAGGGCTTCTCATTCCACTCCAGTTCAGTGGTGTCAGGATTATGAAGTTGAGGCCTATCGCCGCAGACACAACAACAGCGGTCTTAACTTCTTCAACTGGTTTTCTGACCACAACTTCGCAGGATCCAATAGGATTGCTGAGGTGGGTCCTTGCTGGGAAACATGAGGAATGACCCCGGTGTGTTCCCAGCTGCTTGGGTCACCAGTCTGAGCTCTCATGAGGCCTTTTCCGATTGATTCCCC-TGACAGATCCTATGTAAGGACCTGTGGCGCAATCCCCTGCAATACTACAGGAGGATGAAGCCACCTGAAGAGGAAACAGAGATTTCAGGTGAGCCGTACAGTTGGAACTGGAGCTGTCTGATA-CCCAGGATAAGGGTGTTGACACACCTCTCTATTCAGGGAGCCTGGAGGCTCATTTCAGAAATGTAGAACCTGGGGGTCCGTCTTATCCGTGTCGAAATTCCTTGAGAGGAAGACACAGCATGACAGAAGCCAGGACATTCATGGCATTGGG-CTGAAAAAGGCACATGAGACACTGCACTGCAAAGCAGGTTATAACTGTGGAGTCTTAAGCCCAGGGAAGCATAGTGCGTGTCCACACTCAC----------------------------------------------TGAGAAGTAAAGCCGAGTTATTGACTTCAATCTGTGGCACTGGGTTCCATGGCCGTCAACCCGACGGGGAGTCATCTTACCAACCCCTAAAGCTTGGGCTCCCCGAATGTGCCTGGTTGTCCTCCTTGCCACAGACCCCAAAGGACTGTTTAGATCCGTGGATTTT-CTGAAGCTATTACCCCATCGGATTTCCGTGTGCTTTTAGTGTACAACGCGTCCTGTTAGCTGACTCCCGTCACAGAGAATACTGGAAATGGGGCAGGTATTGCAGGGAATAGTTTGTAACCCATGCACGGTAGGAGGAAGTTGAAGAGATCACAAAAGGGG--AAGGGGTAGTCTTTTCTCAGCAGGCCGTAAAATTAAAACATTTTAAATGGTGGCTCAGAGGAGATGCATTTT-GACATGTGTTTGTGTTTCTCTAGGGAAYGCGCAGATGTTGGGTTGAATATGATGGAGCATCGGACACAGGTGCTGTGTTCACCTAACACGGCAGAACTCCTGAAAACTTACTACAGTATGC   
C_lhoesti_Antwerp                 AAGATGGAGCGGAGGCGCAAGCCCCACCTGGACCGCAGAGGCGCCATCATCCAGAGCATGCCTGGCTTCTGGGCCAATGTTGTATCCTTTGCAGTGTTTCTTCTGCTTTTCCAGTTGAGAGGTGCTCTTGGGAAGTGTAAGGAACTTACGGGCGGCTCGGCGTCGATGTGACCATTTGGGGAACAAGGGTGGGTTTCCACAGACAAATGTGGCTGAAGAAAGCCAGAGCAGACACGGGTACTATTTTCCTGCGTGCGTGAGAGAAACGCTTCATGGTGCCAAGCAGCAGACGTTTGGGGCATCTTTCCCAAGAGCAGAAGCGAGTTCTCAGCAGAACACGTGTTGCTGTGAATCAAGCTATTGTTAAGGGACTGTGGCTGCTCCGCCTTGCCAGTCCGATCCGGGACTGGGCTTCTTCGGGTATGAGCAGATTCTGCCAGGCCTCAGACAGCGGCAGTTCTCTGCATATCGCCCCTCCCCGTGTCAGT------GCGGTCAGCCTCACAATGATACACCCTCGGTGAAACCCGAGAGGTCTGAATTCAGGGGGAGGGAGAGGAGAAAGGGAGGTCATTCATGGATGCAGATCTGAAAAAATCCCCTAACCGCCCCTCTGGGTGCTCTTAGGCCTTCCCCGTTGCTTCTAGCT---TTTCTTTCCATTGCATCTCAAGGCTCTTTGACCTCAGTCAGATTGCAAACCACCCTCAGATGTCAGCCCTGATCACTGACCAAGATGAAGACATGCTGAGCTACATGATCAACTTGGAGGTGAGGCCGGGAAGACTAAGGCTGGAGGGTTGAGTGGGGGAGGCCAAGGGAGATAATTTCTTCCTGCAAGCAACAGTGGGCACCTCACCCAAAAAGGTGTTTAAGCTTTCTCCGCCTTGTCCTGACAGGTGAAAGAAGCGAAGCATCCCGTTCATCTCTGCCAGATCATGTTGTTCTTTCGGAGTAACCCCTACTTCCAGAATAAAGTGATTACCAAGGAATATCTCGTGAACGTCACAGGTGACAGGTGGCTCCCAGGATGGGTAGTGGAAGGAGGAAGGTGGGTGGATCAGTGCCAACGTGTTCCAGCCCCCTTACCAAAACGTCCTCTGTCTGTAGAATACAGGGCTTCTCATTCCACTCCAGTTCAGTGGTGTCAGGATTATGAAGTTGAGGCCTATCGCCGCAGACACAACAACAGCGGTCTTAACTTCTTCAACTGGTTTTCTGACCACAACTTCGCAGGATCCAATAGGATTGCTGAGGTGGGTCCTTGCTGGGAAACATGAGGAATGACCCCGGTGTGTTCCCAGCTGCTTGGGTCACCAGTCTGAGCTCTCATGAGGCCTTTTCCGATTGATTCCCC-TGACAGATCCTATGTAAGGACCTGTGGCGCAATCCCCTGCAATACTACAGGAGGATGAAGCCACCTGAAGAGGAAACAGAGATTTCAGGTGAGCCGTACAGTTGGAACTGGAGCTGTCTGATA-CCCAGGATAAGGGTGTTGACACACCTCTCTATTCAGGGAGCCTGGAGGCTCATTTCAGAAATGTAGAACCTGGGGGTCCGTCTTATCCGTGTCGAAATTCCTTGAGAGGAAGACACAGCATGACAGAAGCCAGGACATTCATGGCATTGGG-CTGAAAAAGGCACATGAGACACTGCACTGCAAAGCAGGTTATAACTGTGGACTCTTAAGCCCAGGGAAGCATAGTGCGTGTCCACACTCAC----------------------------------------------TGAGAAGTAAAGCCGAGTTATTGACTTCAATCTGTGGCACTGGGTTCCATGGCCGTCAACCCGACGGGGAGTCATCTTACCAACCCCTAAAGCTTGGGCTCCCCGAATGTGCCTGGTTGTCCTCCTTGCCACAGACCCCAAAGGACTGTTTAGATCCGTGGATTTT-CTGAAGCTATTACCCCATCGGATTTCCGTGTGCTTTTAGTGTACAACGCGTCCTGTTAGCTGACTCCCGTCACAGAGAATACTGGAAATGGGGCAGGTATTGCAGAGAATAGTTTGTAACCCATGCACGGTAGGAGGAAGTTGAAGAGATCACAAAAGGGG--AAGGGGTAGTCTTTTCTCAGCAGGCCGTAAAATTAAAACATTTTAAATGGTGGCTCAGAGGAGATGCATTTT-GACATGTGTTTGTGTTTCTCTAGGGAACGCGCAGATGTTGGGTTGAATATGATGGAGCATCGGACACAGGTGCTGTGTTCACCTAACACGGCAGAACTCCTGAAAACTTACTACAGTATGC  
E_patas_R230                      AAGATGGAGCGGAGGCGCAaGCCCCACCTGGACCGCAGAGGCGCCATCATCCAGAGCATGCCTGGCTTCTGGGCCAATGTGGTATCCTTTGCAGTGTTTCTTCTGCTTTTCCAGTTGAGAGGTGCTCTTGGGAAGTGTAAGGAACTTACGGGCGGCTCGGCGTCGATGTGACCATTTGGGGAACAAGGGTGGGTTTCCACAGACAAATGTGGCTGAAGAAAGCCAGAGCAGACACGGGTACTATTTTCCTGCGTGCGTGAGAGAAACGCTTCATGGTGCCAAGCAGCAGACGTTTGGGGCATCTTTCCGAAGAGCAGAAGCGAGTTCTCAGCAGAACACGTGTTGCTGTGAATCAAGCTATTGTTAAGGGACTGTGACTGCTCCGCCTTGCCAGTCCGATCCGGGACTGGGCTTCTTCGGGTATGAGCAGATTCTGCCAGGCCTCAGACACCGGCAGTTCTCTGCATATCGCCCCTCCCCGTGTCAGT------GCGGTCAGCCTCACAATGATACACCCTCGGTGAAACCCGAGAGGTCTGAATTCAGGGGGAGGGAGAGGAGAAAGGGAGGTCATTCATGGATGCAGATCTGAAAAAATCCCCTAACCGCCCCTCTGGGTGCTCTTAGGCCTTCCCCGTTGCTTCTAGCT---GTTCTTTCCATGGCATCTCAAGGCTCTTTGACCTCAGTCAGATTGCAAACCACCCTCAGATGTCAGCCCTGATCACTGACCAAGATGAAGACATGCTGAGCTACATGATCAACTTGGAGGTGAGGCCGGGAAGACTAAGGCTGGAGGGTTGAGTGGGGGAGGCTAAGGGAGATAATTTATTCCTGCAAGCAACAGTGGGCACCTCACCCAAAAAGGTGTTTAAGCTTTCTCCACCTTGTCCTGACAGGTGAAAGAAGCGAAGCATCCCGTTCATCTCTGCCAGATCATGTTGTTCTTTCGGAGTAACCCCTACTTCCAGAATAAAGTGATTACCAAGGAATATCTCGTGAACGTCACAGGTGACAGGTGGCTCCCAGGATGGGCAGTGGAAGGAGGAAGGTGGGTGGATCAGTGCCAACGTGTTCCAGCCCCCTTACCAAAACGTCCTCTGTCTGTAGAATACAGGGCTTCTCATTCCACTCCAGTTCAGTGGTGTCAGGATTATGAAGTTGAGGCCTATCGCCGCAGACACAACAACAGCGGTCTTAACTTCTTCAACTGGTTTTCTGACCACAACTTCGCAGGATCCAATAGGATTGCTGAGGTGGGTCCTTGCTGGGAAACATGAGGAATGACCCCGGTGTGTTCCCAGCTGCTTGGGTCACCAGTCTGAGCTCTCATGAGGCCTTTTCCGGTTGATTCCCC-TGACAGATCCTATGTAAGGACCTGTGGCGCAATCCCCTGCAATACTACAGGAGGATGAAGCCACCTGAAGAGGAAACAGAGATTTCAGGTGAGCCGTACAGTTGGAACTGGAGCTGTCTGATA-CCCAGGATAAGGGTGTTGACACACCTCTCTATTCAGGGAGCCTGGAGGCTCATTTCAGAAATGTAGAACCTGGGGGTCCGTCTTATCCATGTCGAAATTCCTTGAGAGGAAGACGCAGCATGACAGAAGCCAGGACATTCATGGCATTGGG-CTGAAAAAGGCACATGAGACACCGCACTGCAAAGCAGGTTATAACTGTGGAGTCTTAAGCCCAGGGAAGCATAGTGCGTGTCCACACTCAC----------------------------------------------TGAGAAGTGAAGCCGAGTTATTAACTTCAATCTGTGGCACTTGGTTCCATGGCCGTCAACCCGACGGGGAGTCATCTTACCAACCCCTAAAGCTTGGGCTCCCCGAATGTGCCTGGTTGTCCTCCTTGCCACAGACCACAAAGGACTGTTTAGATCCATGGATTTT-CTGAAGCTATTACCCCATCGGATTTCCGTGTGCTTTTAGTGTACAGCGCGTCTTGTTAGCTGACTCCTGTCACAGAGAATACTGGAAATGGGGCAGGTATTGCAGAGAATAGTTTGTAACCCATGCACGGTAGGAGGAAGTTGAAGAGATCACAAAAGGGG--AAGGGGTAGTCTTTTCTCAGCAGGCCGTAAAATTAAAACATTTTAAATGGTGGCTCAGAGGAGATGCATTTT-GACATGTGTTTGTGTTTCTCTAGGGAACGCGCAGATGTTGGGTTGAATATGATGGAGCATCGGACACAGGTGCTGTGTTCACCTAACACGGCAGAACTCCTGAAAACTTACTACAGTATGC  
C_hamlni_OR_1646                  AAGATGGAGCGGAGGCGCAAGCCCCACCTGGACCGCAGAGGCGCCATCATCCAGAGCATGCCTGGCTTCTGGGCCAATGTTGTATCCTTTGCAGTGTTTCTTCTGCTTTTCCAGTTGAGAGGTGCTCTTGGGAAGTGTAAGGAACTTACGGGCGGCTCGGCGTCGATGTGACCATTTGGGGAACGAGGGTGAGTTTCCACAGACAAATGTGGCTGAAGAAAGCCAGAGCAGACACGGGTACTATTTTCCTGCGTGCGTGAGAGAAACGCTTGGTGGTGCCAAGCAGCAGACGTTTGGGGCATCTTTCTGAAGAGCAGAAGCGAGTTCTCGGCAGAACACGTGTTGCTGTGAATCAAGCTATTGTTAAGGGACTGTGACTGCTCCGCCTTGCCAGTCCGATCCGGGACTGGGCTTCTTCGGGTATGAGCAGATTCTGCCAGGCCTCAGACACCGGCAGTTCTCTGCATATCGCCCCTCCCGGTGTCAGT------GCGGTCAGCCTCGCAATGATACACCCTCGGTGAAACCCGAGAGGTCTGAATTCAGGGGGAGGGAGAGGAGAAAGGGAGGTCGTTCATGGATGCAGATCTGAAAAACTCCCCTAACCGCCCCTCTGGGTGCTCTTAGGCCTTCCCCGTTGCCTCTGGCT---TTTCTTCCCATTGCATCGCAAGGCTCTTTGACCTCAGTCAGATTGCAAACCACCCTCAGATGTCAGCCCTGATCACTGACCAAGATGAAGACATGCTGAGCTACCTGATCAACTTGGAGGTGAGGCCGGGAAGACTGAGGCTGGAGGGTTGAGTGGGGGAGGCTAAGGGAGATAATTGATTCCTGCAAGCAACAGTGGGCACCTCACCCAAAAAGGTGTTTAAGCTTTCTCCACCTTGTCCTGACAGGTGAAAGAAGCGAAGCATCCCGTTCATCTCTGCCAGATCATGTTGTTCTTTCGGAGTAACCCCTACTTCCAGAATAAAGTGATTACCAAGGAATATCTCGTGAACGTCACAGGTGACAGGTGGCTCCCAGGATGGGTAGTGGAAGGAGGAAGGTGGGTGGATCAGTGCCAACGTGTTCCAGCCCCCTTGCCAAAACATCCTCTGTCTGTAGAATACAGGGCTTCTCATTCCACTCCAATTCAGTGGTGTCAGGATTACGAAGTTGAGGCCTATCGCCGCAGACACAACGACAGCGGTCTTAACTTCTTCAACTGGTTTTCTGACCACAACTTCGCAGGATCCAATAGGATTGCTGAGGTGGGTCCTTGCTGGGAAACGTGAGGAATGACCCCGGTGTGTTCCCAGCTGCTTGGGTCACCAGTCTGAGCTCTCATGAGGCCTTTTCCGATTGATTCCCC-TGACAGATCCTATGTAAGGACCTGTGGCGCAATCCCCTGCAATACTACAGGAGGATGAAGCCACCTGAAGAGGAAACAGAGATTTCAGGTGAGCCGTACAGTTGGAACCGGAGCTGTCTGATA-CCCAGGATAAGGGTGTTGACACACCTCTCTATTCAGGGAGCCTGGAGGCTCATTTCAGAAATGTAGAACCTGGGGGTCCGTCTTACCCATGTCGAAATTCCTTGAGAGGAAGACACAGCATGACAGAAGCCAGGACATTCATGGCATTGGG-CTGAAAAAGGCACATGAGACACCGCACTGCAAAGCAGGTTATAACTGTGGAGTCTTCAGCCCAGGGAAGCATAGTGCGTGTCCACACTCAC----------------------------------------------TGAGAAGTAAAGCCGAGTTATTAACTTCAATCTGTGGCACTTGGTTCCACGGCCGTCAACCCGACGGGGAGTCATCTTACCAACCCCTAAAGCTTGGGCTCCCCGAATGTGCCTGGTTGTCCTCCTTGCCACAGACCACAAAGGACTGCTTAGATCCATGGATTTT-CTGAAGCTATGACCCCATCGGATTTCCGTGTGCTTTTAGTGTACAACGCGTCTTGTTAGCTGACTCCTGTCACAGAGAATACTGGAAATGGGGCAGGTATTGCAGAGAATAGTTTGTAACACATGCATGGTAGGAGGAAGTTGAAGAGATCACAAAAGGGG--AAGGGGTAGTCTTTTCTCAGCAGGCCGTAAAATTAAAACATTTTAAATGGTGGCTCAGAGGAGATGCATTTT-GACATGTGTTTGTGTTTCTCTAGGGAACGCGCAGATGTTGGGTTGAATATGATGGAGCATCGGACACGGGTGCCGTGTTCACCTAACACGGCAGAACTCCTGAAAACTTACTACACTATGC   
C_hamlyni_ME404                   AAGATGGAGCGGAGGCGCAAGCCCCACCTGGACCGCAGAGGCGCCATCATCCAGAGCATGCCTGGCTTCTGGGCCAATGTTGTATCCTTTGCAGTGTTTCTTCTGCTTTTCCAGTTGAGAGGTGCTCTTGGGAAGTGTAAGGAACTTACGGGCGGCTCGGCGTCGATGTGACCATTTGGGGAACGAGGGTGAGTTTCCACAGACAAATGTGGCTGAAGAAAGCCAGAGCAGACACGGGTACTATTTTCCTGCGTGCGTGAGAGAAACGCTTGGTGGTGCCAAGCAGCAGACGTTTGGGGCATCTTTCTGAAGAGCAGAAGCGAGTTCTCGGCAGAACACGTGTTGCTGTGAATCAAGCTATTGTTAAGGGACTGTGACTGCTCCGCCTTGCCAGTCCGATCCGGGACTGGGCTTCTTCGGGTATGAGCAGATTCTGCCAGGCCTCAGACACCGGCAGTTCTCTGCATATCGCCCCTCCCGGTGTCAGT------GCGGTCAGCCTCGCAATGATACACCCTCGGTGAAACCCGAGAGGTCTGAATTCAGGGGGAGGGAGAGGAGAAAGGGAGGTCGTTCATGGATGCAGATCTGAAAAACTCCCCTAACCGCCCCTCTGGGTGCTCTTAGGCCTTCCCCGTTGCCTCTGGCT---TTTCTTCCCATTGCATCGCAAGGCTCTTTGACCTCAGTCAGATTGCAAACCACCCTCAGATGTCAGCCCTGATCACTGACCAAGATGAAGACATGCTGAGCTACCTGATCAACTTGGAGGTGAGGCCGGGAAGACTGAGGCTGGAGGGTTGAGTGGGGGAGGCTAAGGGAGATAATTGATTCCTGCAAGCAACAGTGGGCACCTCACCCAAAAAGGTGTTTAAGCTTTCTCCACCTTGTCCTGACAGGTGAAAGAAGCGAAGCATCCCGTTCATCTCTGCCAGATCATGTTGTTCTTTCGGAGTAACCCCTACTTCCAGAATAAAGTGATTACCAAGGAATATCTCGTGAACGTCACAGGTGACAGGTGGCTCCCAGGATGGGTAGTGGAAGGAGGAAGGTGGGTGGATCAGTGCCAACGTGTTCCAGCCCCCTTGCCAAAACATCCTCTGTCTGTAGAATACAGGGCTTCTCATTCCACTCCAATTCAGTGGTGTCAGGATTACGAAGTTGAGGCCTATCGCCGCAGACACAACGACAGCGGTCTTAACTTCTTCAACTGGTTTTCTGACCACAACTTCGCAGGATCCAATAGGATTGCTGAGGTGGGTCCTTGCTGGGAAACGTGAGGAATGACCCCGGTGTGTTCCCAGCTGCTTGGGTCACCAGTCTGAGCTCTCATGAGGCCTTTTCCGATTGATTCCCC-TGACAGATCCTATGTAAGGACCTGTGGCGCAATCCCCTGCAATACTACAGGAGGATGAAGCCACCTGAAGAGGAAACAGAGATTTCAGGTGAGCCGTACAGTTGGAACCGGAGCTGTCTGATA-CCCAGGATAAGGGTGTTGACACACCTCTCTATTCAGGGAGCCTGGAGGCTCATTTCAGAAATGTAGAACCTGGGGGTCCGTCTTACCCATGTCGAAATTCCTTGAGAGGAAGACACAGCATGACAGAAGCCAGGACATTCATGGCATTGGG-CTGAAAAAGGCACATGAGACACCGCACTGCAAAGCAGGTTATAACTGTGGAGTCTTCAGCCCAGGGAAGCATAGTGCGTGTCCACACTCAC----------------------------------------------TGAGAAGTAAAGCCGAGTTATTAACTTCAATCTGTGGCACTTGGTTCCACGGCCGTCAACCCGACGGGGAGTCATCTTACCAACCCCTAAAGCTTGGGCTCCCCGAATGTGCCTGGTTGTCCTCCTTGCCACAGACCACAAAGGACTGCTTAGATCCATGGATTTT-CTGAAGCTATGACCCCATCGGATTTCCGTGTGCTTTTAGTGTACAACGCGTCTTGTTAGCTGACTCCTGTCACAGAGAATACTGGAAATGGGGCAGGTATTGCAGAGAATAGTTTGTAACACATGCATGGTAGGAGGAAGTTGAAGAGATCACAAAAGGGG--AAGGGGTAGTCTTTTCTCAGCAGGCCGTAAAATTAAAACATTTTAAATGGTGGCTCAGAGGAGATGCATTTT-GACATGTGTTTGTGTTTCTCTAGGGAACGCGCAGATGTTGGGTTGAATATGATGGAGCATCGGACACGGGTGCCGTGTTCACCTAACACGGCAGAACTCCTGAAAACTTACTACACTATGC  
C_hamlyni_GP612                   AAGATGGAGCGGAGGCGCAAGCCCCACCTGGACCGCAGAGGCGCCATCATCCAGAGCATGCCTGGCTTCTGGGCCAATGTTGTATCCTTTGCAGTGTTTCTTCTGCTTTTCCAGTTGAGAGGTGCTCTTGGGAAGTGTAAGGAACTTACGGGCGGCTCGGCGTCGATGTGACCATTTGGGGAACGAGGGTGAGTTTCCACAGACAAATGTGGCTGAAGAAAGCCAGAGCAGACACGGGTACTATTTTCCTGCGTGCGTGAGAGAAACGCTTGGTGGTGCCAAGCAGCAGACGTTTGGGGCATCTTTCTGAAGAGCAGAAGCGAGTTCTCGGCAGAACACGTGTTGCTGTGAATCAAGCTATTGTTAAGGGACTGTGACTGCTCCGCCTTGCCAGTCCGATCCGGGACTGGGCTTCTTCGGGTATGAGCAGATTCTGCCAGGCCTCAGACACCGGCAGTTCTCTGCATATCGCCCCTCCCGGTGTCAGT------GCGGTCAGCCTCGCAATGATACACCCTCGGTGAAACCCGAGAGGTCTGAATTCAGGGGGAGGGAGAGGAGAAAGGGAGGTCGTTCATGGATGCAGATCTGAAAAACTCCCCTAACCGCCCCTCTGGGTGCTCTTAGGCCTTCCCCGTTGCCTCTGGCT---TTTCTTCCCATTGCATCGCAAGGCTCTTTGACCTCAGTCAGATTGCAAACCACCCTCAGATGTCAGCCCTGATCACTGACCAAGATGAAGACATGCTGAGCTACCTGATCAACTTGGAGGTGAGGCCGGGAAGACTGAGGCTGGAGGGTTGAGTGGGGGAGGCTAAGGGAGATAATTGATTCCTGCAAGCAACAGTGGGCACCTCACCCAAAAAGGTGTTTAAGCTTTCTCCACCTTGTCCTGACAGGTGAAAGAAGCGAAGCATCCCGTTCATCTCTGCCAGATCATGTTGTTCTTTCGGAGTAACCCCTACTTCCAGAATAAAGTGATTACCAAGGAATATCTCGTGAACGTCACAGGTGACAGGTGGCTCCCAGGATGGGTAGTGGAAGGAGGAAGGTGGGTGGATCAGTGCCAACGTGTTCCAGCCCCCTTGCCAAAACATCCTCTGTCTGTAGAATACAGGGCTTCTCATTCCACTCCAATTCAGTGGTGTCAGGATTACGAAGTTGAGGCCTATCGCCGCAGACACAACGACAGCGGTCTTAACTTCTTCAACTGGTTTTCTGACCACAACTTCGCAGGATCCAATAGGATTGCTGAGGTGGGTCCTTGCTGGGAAACGTGAGGAATGACCCCGGTGTGTTCCCAGCTGCTTGGGTCACCAGTCTGAGCTCTCATGAGGCCTTTTCCGATTGATTCCCC-TGACAGATCCTATGTAAGGACCTGTGGCGCAATCCCCTGCAATACTACAGGAGGATGAAGCCACCTGAAGAGGAAACAGAGATTTCAGGTGAGCCGTACAGTTGGAACCGGAGCTGTCTGATA-CCCAGGATAAGGGTGTTGACACACCTCTCTATTCAGGGAGCCTGGAGGCTCATTTCAGAAATGTAGAACCTGGGGGTCCGTCTTACCCATGTCGAAATTCCTTGAGAGGAAGACACAGCATGACAGAAGCCAGGACATTCATGGCATTGGG-CTGAAAAAGGCACATGAGACACCGCACTGCAAAGCAGGTTATAACTGTGGAGTCTTCAGCCCAGGGAAGCATAGTGCGTGTCCACACTCAC----------------------------------------------TGAGAAGTAAAGCCGAGTTATTAACTTCAATCTGTGGCACTTGGTTCCACGGCCGTCAACCCGACGGGGAGTCATCTTACCAACCCCTAAAGCTTGGGCTCCCCGAATGTGCCTGGTTGTCCTCCTTGCCACAGACCACAAAGGACTGCTTAGATCCATGGATTTT-CTGAAGCTATGACCCCATCGGATTTCCGTGTGCTTTTAGTGTACAACGCGTCTTGTTAGCTGACTCCTGTCACAGAGAATACTGGAAATGGGGCAGGTATTGCAGAGAATAGTTTGTAACACATGCATGGTAGGAGGAAGTTGAAGAGATCACAAAAGGGG--AAGGGGTAGTCTTTTCTCAGCAGGCCGTAAAATTAAAACATTTTAAATGGTGGCTCAGAGGAGATGCATTTT-GACATGTGTTTGTGTTTCTCTAGGGAACGCGCAGATGTTGGGTTGAATATGATGGAGCATCGGACACGGGTGCCGTGTTCACCTAACACGGCAGAACTCCTGAAAACTTACTACACTATGC  
C_lomamiensis_GP609               AAGATGGAGCGGAGGCGCAAGCCCCACCTGGACCGCAGAGGCGCCATCATCCAGAGCATGCCTGGCTTCTGGGCCAATGTTGTATCCTTTGCAGTGTTTCTTCTGCTTTTCCAGTTGAGAGGTGCTCTTGGGAAGTGTAAGGAACTTACGGGCGGCTCGGCGTCGATGTGACCATTTGGGGAACGAGGGTGAGTTTCCACAGACAAATGTGGCTGAAGAAAGCCAGAGCAGACACGGGTACTATTTTCCTGCGTGCGTGAGAGAAACGCTTGGTGGTGCCAAGCAGCAGACGTTTGGGGCATCTTTCTGAAGAGCAGAAGCGAGTTCTCGGCAGAACACGTGTTGCTGTGAATCAAGCTATTGTTAAGGGACTGTGACTGCTCCGCCTTGCCAGTCCGATCCGGGACTGGGCTTCTTCGGGTATGAGCAGATTCTGCCAGGCCTCAGACACCGGCAGTTCTCTGCATATCGCCCCTCCCGGTGTCAGT------GCGGTCAGCCTCGCAATGATACACCCTCGGTGAAACCCGAGAGGTCTGAATTCAGGGGGAGGGAGAGGAGAAAGGGAGGTCGTTCATGGATGCAGATCTGAAAAAATCCCCTAACCGCCCCTCTGGGTGCTCTTAGGCCTTCCCCGTTGCCTCTAGCT---TTTCTTCCCATTGCATCGCAAGGCTCTTTGACCTCAGTCAGATTGCAAACCACCCTCAGATGTCAGCCCTGATCACTGACCAAGATGAAGACATGCTGAGCTACCTGATCAACTTGGAGGTGAGGCCGGGAAGACTGAGGCTGGAGGGTTGAGTGGGGGAGGCTAAGGGAGATAATTGATTCCTGCAAGCAACAGTGGGCACCTCACCCAAAAAGGTGTTTAAGCTTTCTCCACCTTGTCCTGACAGGTGAAAGAAGCGAAGCATCCCGTTCATCTCTGCCAGATCATGTTGTTCTTTCGGAGTAACCCCTACTTCCAGAATAAAGTGATTACCAAGGAATATCTCGTGAACGTCACAGGTGACAGGTGGCTCCCAGGCTGGGTAGTGGAAGGAGGAAGGTGGGTGGATCAGTGCCAACGTGTTCCAGCCCCCTTGCCAAAACATCCTCTGTCTGTAGAATACAGGGCTTCTCATTCCACTCCAATTCAGTGGTGTCAGGATTACCAAGTTGAGGCCTATCGCCGCAGACACAACGACAGCGGTCTTAACTTCTTCAACTGGTTTTCTGACCACAACTTCGCAGGATCCAATAGGATTGCTGAGGTGGGTCCTTGCTGGGAAACGTGAGGAATGACCCCGGTGTGTTCCCAGCTGCTTGGGTCACCAGTCTGAGCTCTCATGAGGCCTTTTCCGATTGATTCCCC-TGACAGATCCTATGTAAGGACCTGTGGCGCAATCCCCTGCAATACTACAGGAGGATGAAGCCACCTGAAGAGGAAACAGAGATTTCAGGTGAGCCGTACAGTTGGAACCGGAGCTGTCTGATA-CCCAGGATAAGGGTGTTGACACACCTCTCTATTCAGGGAGCCTGGAGGCTCATTTCAGAAATGTAGAACCTGGGGGTCCGTCTTACCCATGTCGAAATTCCTTGAGAGGAAGACACAGCATGACAGAAGCCAGGACATTCATGGCATTGGG-CTGAAAAAGGCACATGAGACACCGCACTGCAAAGCAGGTTATAACTGTGGAGTCTTAAGCCCAGGGAAGCATAGTGCGTGTCCACACTCAC----------------------------------------------TGAGAAGTAAAGCCGAGTTATTAACTTCAATCTGTGGCACTTGGTTCCATGGCCGTCAACCCGACGGGGAGTCATCTTACCAACCCCTAAAGCTTGGGCTCCCCGAATGTGCCTGGTTGTCCTCCTTGCCACAGACCACAAAGGACTGCTTAGATCCATGGATTTTTCTGAAGCTATGACCCCATCGGATTTCCGTGTGCTTTTAGTGTACAACGCGTCTTGTTAGCTGACTCCTGTCACAGAGAATACTGGAAATGGGGCAGGTATTGCAGAGAATAGTTTGTAACACATGCATGGTAGGAGGAAGTTGAAGAGATCACAAAAGGGG--AAGGGGTAGTCTTTTCTCAGCAGGCCGTAAAATTAAAACATTTTAAATGGTGGCTCAGAGGAGATGCATTTT-GACATGTGTTTGTGTTTCTCTAGGGAACGCGCAGATGTTGGGTTGAATATGATGGAGCATCGGACACGGGTGCTGTGTTCACCTAACACGGCAGAACTCCTGAAAACTTACTACAGTATGC   
C_lomamiensis_JH005               AAGATGGAGCGGAGGCGCAAGCCCCACCTGGACCGCAGAGGCGCCATCATCCAGAGCATGCCTGGCTTCTGGGCCAATGTTGTATCCTTTGCAGTGTTTCTTCTGCTTTTCCAGTTGAGAGGTGCTCTTGGGAAGTGTAAGGAACTTACGGGCGGCTCGGCGTCGATGTGACCATTTGGGGAACGAGGGTGAGTTTCCACAGACAAATGTGGCTGAAGAAAGCCAGAGCAGACACGGGTACTATTTTCCTGCGTGCGTGAGAGAAACGCTTGGTGGTGCCAAGCAGCAGACGTTTGGGGCATCTTTCTGAAGAGCAGAAGCGAGTTCTCGGCRGAACACGTGTTGCTGTGAATCAAGCTATTGTTAAGGGACTGTGACTGCTCCGCCTTGCCAGTCCGATCCGGGACTGGGCTTCTTCGGGTATGAGCAGATTCTGCCAGGCCTCAGACACCGGCAGTTCTCTGCATATCGCCCCTCCCGGTGTCAGT------GCGGTCAGCCTCGCAATGATACACCCTCGGTGAAACCCGAGAGGTCTGAATTCAGGGGGAGGGAGAGGAGAAAGGGAGGTCGTTCATGGATGCAGATCTGAAAAAATCCCCTAACCGCCCCTCTGGGTGCTCTTAGGCCTTCCCCGTTGCCTCTAGCT---TTTCTTCCCATTGCATCGCAAGGCTCTTTGACCTCAGTCAGATTGCAAACCACCCTCAGATGTCAGCCCTGATCACTGACCAAGATGAAGACATGCTGAGCTACCTGATCAACTTGGAGGTGAGGCCGGGAAGACTGAGGCTGGAGGGTTGAGTGGGGGAGGCTAAGGGAGATAATTGATTCCTGCAAGCAACAGTGGGCACCTCACCCAAAAAGGTGTTTAAGCTTTCTCCACCTTGTCCTGACAGGTGAAAGAAGCGAAGCATCCCGTTCATCTCTGCCAGATCATGTTGTTCTTTCGGAGTAACCCCTACTTCCAGAATAAAGTGATTACCAAGGAATATCTCGTGAACGTCACAGGTGACAGGTGGCTCCCAGGCTGGGTAGTGGAAGGAGGAAGGTGGGTGGATCAGTGCCAACGTGTTCCAGCCCCCTTGCCAAAACATCCTCTGTCTGTAGAATACAGGGCTTCTCATTCCACTCCAATTCAGTGGTGTCAGGATTACCAAGTTGAGGCCTATCGCCGCAGACACAACGACAGCGGTCTTAACTTCTTCAACTGGTTTTCTGACCACAACTTCGCAGGATCCAATAGGATTGCTGAGGTGGGTCCTTGCTGGGAAACGTGAGGAATGACCCCGGTGTGTTCCCAGCTGCTTGGGTCACCAGTCTGAGCTCTCATGAGGCCTTTTCCGATTGATTCCCC-TGACAGATCCTATGTAAGGACCTGTGGCGCAATCCCCTGCAATACTACAGGAGGATGAAGCCACCTGAAGAGGAAACAGAGATTTCAGGTGAGCCGTACAGTTGGAACCGGAGCTGTCTGATA-CCCAGGATAAGGGTGTTGACACACCTCTCTATTCAGGGAGCCTGGAGGCTCATTTCAGAAATGTAGAACCTGGGGGTCCGTCTTACCCATGTCGAAATTCCTTGAGAGGAAGACACAGCATGACAGAAGCCAGGACATTCATGGCATTGGG-CTGAAAAAGGCACATGAGACACCGCACTGCAAAGCAGGTTATAACTGTGGAGTCTTAAGCCCAGGGAAGCATAGTGCGTGTCCACACTCAC----------------------------------------------TGAGAAGTAAAGCCGAGTTATTAACTTCAATCTGTGGCACTTGGTTCCATGGCCGTCAACCCGACGGGGAGTCATCTTACCAACCCCTAAAGCTTGGGCTCCCCGAATGTGCCTGGTTGTCCTCCTTGCCACAGACCACAAAGGACTGCTTAGATCCATGGATTTTTCTGAAGCTATGACCCCATCGGATTTCCGTGTGCTTTTAGTGTACAACGCGTCTTGTTAGCTGACTCCTGTCACAGAGAATACTGGAAATGGGGCAGGTATTGCAGAGAATAGTTTGTAACACATGCATGGTAGGAGGAAGTTGAAGAGATCACAAAAGGGG--AAGGGGTAGTCTTTTCTCAGCAGGCCGTAAAATTAAAACATTTTAAATGGTGGCTCAGAGGAGATGCATTTT-GACATGTGTTTGTGTTTCTCTAGGGAACGCGCAGATGTTGGGTTGAATATGATGGAGCATCGGACACGGGTGCTGTGTTCACCTAACACGGCAGAACTCCTGAAAACTTACTACAGTATGC   
C_lomamiensis_ME408               AAGATGGAGCGGAGGCGCAAGCCCCACCTGGACCGCAGAGGCGCCATCATCCAGAGCATGCCTGGCTTCTGGGCCAATGTTGTATCCTTTGCAGTGTTTCTTCTGCTTTTCCAGTTGAGAGGTGCTCTTGGGAAGTGTAAGGAACTTACGGGCGGCTCGGCGTCGATGTGACCATTTGGGGAACGAGGGTGAGTTTCCACAGACAAATGTGGCTGAAGAAAGCCAGAGCAGACACGGGTACTATTTTCCTGCGTGCGTGAGAGAAACGCTTGGTGGTGCCAAGCAGCAGACGTTTGGGGCATCTTTCTGAAGAGCAGAAGCGAGTTCTCGGCRGAACACGTGTTGCTGTGAATCAAGCTATTGTTAAGGGACTGTGACTGCTCCGCCTTGCCAGTCCGATCCGGGACTGGGCTTCTTCGGGTATGAGCAGATTCTGCCAGGCCTCAGACACCGGCAGTTCTCTGCATATCGCCCCTCCCGGTGTCAGT------GCGGTCAGCCTCGCAATGATACACCCTCGGTGAAACCCGAGAGGTCTGAATTCAGGGGGAGGGAGAGGAGAAAGGGAGGTCGTTCATGGATGCAGATCTGAAAAAATCCCCTAACCGCCCCTCTGGGTGCTCTTAGGCCTTCCCCGTTGCCTCTAGCT---TTTCTTCCCATTGCATCGCAAGGCTCTTTGACCTCAGTCAGATTGCAAACCACCCTCAGATGTCAGCCCTGATCACTGACCAAGATGAAGACATGCTGAGCTACCTGATCAACTTGGAGGTGAGGCCGGGAAGACTGAGGCTGGAGGGTTGAGTGGGGGAGGCTAAGGGAGATAATTGATTCCTGCAAGCAACAGTGGGCACCTCACCCAAAAAGGTGTTTAAGCTTTCTCCACCTTGTCCTGACAGGTGAAAGAAGCGAAGCATCCCGTTCATCTCTGCCAGATCATGTTGTTCTTTCGGAGTAACCCCTACTTCCAGAATAAAGTGATTACCAAGGAATATCTCGTGAACGTCACAGGTGACAGGTGGCTCCCAGGCTGGGTAGTGGAAGGAGGAAGGTGGGTGGATCAGTGCCAACGTGTTCCAGCCCCCTTGCCAAAACATCCTCTGTCTGTAGAATACAGGGCTTCTCATTCCACTCCAATTCAGTGGTGTCAGGATTACCAAGTTGAGGCCTATCGCCGCAGACACAACGACAGCGGTCTTAACTTCTTCAACTGGTTTTCTGACCACAACTTCGCAGGATCCAATAGGATTGCTGAGGTGGGTCCTTGCTGGGAAACGTGAGGAATGACCCCGGTGTGTTCCCAGCTGCTTGGGTCACCAGTCTGAGCTCTCATGAGGCCTTTTCCGATTGATTCCCC-TGACAGATCCTATGTAAGGACCTGTGGCGCAATCCCCTGCAATACTACAGGAGGATGAAGCCACCTGAAGAGGAAACAGAGATTTCAGGTGAGCCGTACAGTTGGAACCGGAGCTGTCTGATA-CCCAGGATAAGGGTGTTGACACACCTCTCTATTCAGGGAGCCTGGAGGCTCATTTCAGAAATGTAGAACCTGGGGGTCCGTCTTACCCATGTCGAAATTCCTTGAGAGGAAGACACAGCATGACAGAAGCCAGGACATTCATGGCATTGGG-CTGAAAAAGGCACATGAGACACCGCACTGCAAAGCAGGTTATAACTGTGGAGTCTTAAGCCCAGGGAAGCATAGTGCGTGTCCACACTCAC----------------------------------------------TGAGAAGTAAAGCCGAGTTATTAACTTCAATCTGTGGCACTTGGTTCCATGGCCGTCAACCCGACGGGGAGTCATCTTACCAACCCCTAAAGCTTGGGCTCCCCGAATGTGCCTGGTTGTCCTCCTTGCCACAGACCACAAAGGACTGCTTAGATCCATGGATTTTTCTGAAGCTATGACCCCATCGGATTTCCGTGTGCTTTTAGTGTACAACGCGTCTTGTTAGCTGACTCCTGTCACAGAGAATACTGGAAATGGGGCAGGTATTGCAGAGAATAGTTTGTAACACATGCATGGTAGGAGGAAGTTGAAGAGATCACAAAAGGGG--AAGGGGTAGTCTTTTCTCAGCAGGCCGTAAAATTAAAACATTTTAAATGGTGGCTCAGAGGAGATGCATTTT-GACATGTGTTTGTGTTTCTCTAGGGAACGCGCAGATGTTGGGTTGAATATGATGGAGCATCGGACACGGGTGCTGTGTTCACCTAACACGGCAGAACTCCTGAAAACTTACTACAGTATGC  
C_lomamiensis_GP600               AAGATGGAGCGGAGGCGCAAGCCCCACCTGGACCGCAGAGGCGCCATCATCCAGAGCATGCCTGGCTTCTGGGCCAATGTTGTATCCTTTGCAGTGTTTCTTCTGCTTTTCCAGTTGAGAGGTGCTCTTGGGAAGTGTAAGGAACTTACGGGCGGCTCGGCGTCGATGTGACCATTTGGGGAACGAGGGTGAGTTTCCACAGACAAATGTGGCTGAAGAAAGCCAGAGCAGACACGGGTACTATTTTCCTGCGTGCGTGAGAGAAACGCTTGGTGGTGCCAAGCAGCAGACGTTTGGGGCATCTTTCTGAAGAGCAGAAGCGAGTTCTCGGCRGAACACGTGTTGCTGTGAATCAAGCTATTGTTAAGGGACTGTGACTGCTCCGCCTTGCCAGTCCGATCCGGGACTGGGCTTCTTCGGGTATGAGCAGATTCTGCCAGGCCTCAGACACCGGCAGTTCTCTGCATATCGCCCCTCCCGGTGTCAGT------GCGGTCAGCCTCGCAATGATACACCCTCGGTGAAACCCGAGAGGTCTGAATTCAGGGGGAGGGAGAGGAGAAAGGGAGGTCGTTCATGGATGCAGATCTGAAAAAATCCCCTAACCGCCCCTCTGGGTGCTCTTAGGCCTTCCCCGTTGCCTCTAGCT---TTTCTTCCCATTGCATCGCAAGGCTCTTTGACCTCAGTCAGATTGCAAACCACCCTCAGATGTCAGCCCTGATCACTGACCAAGATGAAGACATGCTGAGCTACCTGATCAACTTGGAGGTGAGGCCGGGAAGACTGAGGCTGGAGGGTTGAGTGGGGGAGGCTAAGGGAGATAATTGATTCCTGCAAGCAACAGTGGGCACCTCACCCAAAAAGGTGTTTAAGCTTTCTCCACCTTGTCCTGACAGGTGAAAGAAGCGAAGCATCCCGTTCATCTCTGCCAGATCATGTTGTTCTTTCGGAGTAACCCCTACTTCCAGAATAAAGTGATTACCAAGGAATATCTCGTGAACGTCACAGGTGACAGGTGGCTCCCAGGCTGGGTAGTGGAAGGAGGAAGGTGGGTGGATCAGTGCCAACGTGTTCCAGCCCCCTTGCCAAAACATCCTCTGTCTGTAGAATACAGGGCTTCTCATTCCACTCCAATTCAGTGGTGTCAGGATTACCAAGTTGAGGCCTATCGCCGCAGACACAACGACAGCGGTCTTAACTTCTTCAACTGGTTTTCTGACCACAACTTCGCAGGATCCAATAGGATTGCTGAGGTGGGTCCTTGCTGGGAAACGTGAGGAATGACCCCGGTGTGTTCCCAGCTGCTTGGGTCACCAGTCTGAGCTCTCATGAGGCCTTTTCCGATTGATTCCCC-TGACAGATCCTATGTAAGGACCTGTGGCGCAATCCCCTGCAATACTACAGGAGGATGAAGCCACCTGAAGAGGAAACAGAGATTTCAGGTGAGCCGTACAGTTGGAACCGGAGCTGTCTGATA-CCCAGGATAAGGGTGTTGACACACCTCTCTATTCAGGGAGCCTGGAGGCTCATTTCAGAAATGTAGAACCTGGGGGTCCGTCTTACCCATGTCGAAATTCCTTGAGAGGAAGACACAGCATGACAGAAGCCAGGACATTCATGGCATTGGG-CTGAAAAAGGCACATGAGACACCGCACTGCAAAGCAGGTTATAACTGTGGAGTCTTAAGCCCAGGGAAGCATAGTGCGTGTCCACACTCAC----------------------------------------------TGAGAAGTAAAGCCGAGTTATTAACTTCAATCTGTGGCACTTGGTTCCATGGCCGTCAACCCGACGGGGAGTCATCTTACCAACCCCTAAAGCTTGGGCTCCCCGAATGTGCCTGGTTGTCCTCCTTGCCACAGACCACAAAGGACTGCTTAGATCCATGGATTTTTCTGAAGCTATGACCCCATCGGATTTCCGTGTGCTTTTAGTGTACAACGCGTCTTGTTAGCTGACTCCTGTCACAGAGAATACTGGAAATGGGGCAGGTATTGCAGAGAATAGTTTGTAACACATGCATGGTAGGAGGAAGTTGAAGAGATCACAAAAGGGG--AAGGGGTAGTCTTTTCTCAGCAGGCCGTAAAATTAAAACATTTTAAATGGTGGCTCAGAGGAGATGCATTTT-GACATGTGTTTGTGTTTCTCTAGGGAACGCGCAGATGTTGGGTTGAATATGATGGAGCATCGGACACGGGTGCTGTGTTCACCTAACACGGCAGAACTCCTGAAAACTTACTACAGTATGC  
A_nigroviridis_R14697             AAGATGGAGCGGAGGCGCAAGCCCCACCTGGACCGCAGAGGCGCCATCATCCAGAGCATGCCTGGCTTCTGGGCCAATGTTGTATCCTTTGCAGCGTTTCTTCTGCTTTTCCAGTTGAGAGGTGCTCTTGGGAAGTGTAAGGAACTTCCGGGCGGCTCCGCGTCGATGTGACCATTTGGGGAACAAGGGTGAGTTTCCACAGACAAATGTGGCTGAAGAAAGCCAGAGCAGACCCGGGTACTATTTTCCTGCGTGCGTGAGAGAAACGCTTCATGGTGCCAAGCAGCAGACGTTTGGGGCATCTTTCTGAAGAGCAGAAGCGAGTTCTCAGCAGAACACGTGTTGCTGTGAATCAAGCTATTGTTAAGGGACTGTGACTGCTCCGGCTCGCCAGTCCGATCCGGGACTGGGCATCTTCGGGTATGAGCAGATTCTGCCAGGCCTCAGACACCGGCAGTTCTCTGCATATCGCCCCTCCCCGTGTCAGT------GCGGTCAGCCTCACAGTGATACACCCTCGGTGAAACCCGAGAGGTCTGAATTCAGGGGGAGGGAGAGGAGAAAGGGAGGTCATTCATGGATGCAGATCTGAAAAAATCCCCTAACCGCCCCTCTGGGTGCTCTTAGGCCTTCCCCGTTGCTTCTAGCT---TTTCTTTCCATTGCATCTCAAGGCTCTTTGACCTCAGTCAGATTGCAAACCACCCTCAGATGTCAGCCCTGATCACTGACCAAGATGAAGACATGCTGAGCTACATGATCAACTTGGAGGTGAGGCCGGGAAGACTACGGCTGGAGGGTTGGGTGGGGGAGGCTAAGGGAGATAATTTATTCCTGCAAGCAACAGTGGGCACCTCACCCAAAGAGGTGTTTAAGCTTTCTCCACCTTGTCCTGACAGGTGAAAGAAGCGAAGCATCCCGTTCATCTCTGCCAGATCATGTTGTTCTTTCGGAGTAACCCCTACTTCCAGAATAAAGTGATTACCAAGGAATATCTGGTGAACGTCACAGGTGACAGGTGGCTCCCAGGATGGGTGGTGGAAGGAGGAAGGCGGGTGGATCAGTGCCAACGTGTTCCAGCCCCCTTGCCGAAACATCCTCTGTCTGTAGAATACAGGGCTTCTCATTCCACTCCAATTCAGTGGTGTCAGGATTATGAAGTTGAGGCCTATCGCCGCAGACACAACAACAGCGGTCTTAACTTCTTCAACTGGTTTTCTGACCACAACTTCGCAGGATCCAATAGGATTGCTGAGGTGGGTCCTTGCTGGGAAACATGAGGAATGACCCCGGTGTGTTCCCAGCTGCTTGGGTCACCAGTCTGAGCTCTCATGAGGCCTTTTCCGATTGATTCCCC-TGACAGATCCTATGTAAGGACCTGTGGCGCAATCCCCTGCAATACTACAGGAGGATGAAGCCACCTGAAGAGGAAACAGAGATTTCAGGTGAGCCGTACAGTTGGAACTGGAGCCGTCTGATA-CCCAGGATAAGGGTGTTGACACACCTCTCTATTCAGGGAGCCTGGAGGCTCATTTCAGAAATGTAGAACCTGGGGGTCCGTCTTATCCGTGTCGAAATTCCTTGAGAGGAAGACACAGCATGACAGAAGCCAGGACATTCACGGCATTGGG-CTGAAAAAGGCACATGAGACACTGCACTGCAAAGCAGGTTATAACTGTGGAGTCTTAAGCCCAGGGAAGCATAGTGCGTGTCCACACTCAC----------------------------------------------TGAGAAGTAAAGCCGAGTTATTAACTTCCATCTGTGGCACTTGGTTCCACGGCCGTCAACCCGACGGCGAGTCATCTTACCTAGCCCTAAAGCTTGGGCTCCCCGAATGTCCCTGGTTGTCCTCCTTGCCACAGACCGCAAAGGACTGTTTAGATCCATGGATTTT-CTGAAGCCATTACCCCATCGGATTTCCGTGTGCTTTTAGTGAACAACGCGTCTTGTTAGCTGACTCCTGTCACAGAGAATACTGGAAATGGGGCAGGTATTGCAGAGAATAGTTTGTAACACATGCACGGTAGGAGGAAGTTGAAGAGATCACAAAAGGGG--AAGGGGTAGTCTTTTCTCAGCAGGCCGTAAAATTAAAACATTTTCAATGGCGGCTCAGAGGAGATGCATTTT-GACATGTGTTTGTGTTTCTCTAGGGAACGCGCAGATGTTGGGTTGAATATGATGGAGCATCGGACACAGGTGCTGTGTTCACCTAACACGGCAGAACTCCTGAAAACTTACTACAGTATGC  
T_gelada_891096                   AAGATGGAGCGGAGGCGCAAGCCCCACCTGGACCGCAGAGGCGCCATCATCCAGGGCATGCCTGGCTTCTGGGCCAATGTTGTATCCTTTGCAGTGTTTCTTCTGCTTTTCCAGTTGAGAGGTGCTCTTGGGAAGTGTAAGGAACTTACGGGCGGCTCGGCGTCGATGTGACCATTTGGGGAACAAGGGTGACTTTCCACAGACAAATGTGGCTGAAGAAAGCCAGAGCAGACACGGGTACTATTTTCCTGCGTGCGTGAGAGAAACGCTTCGTGGTGCCAGGCAGCAGACGTGTGGGGCATCTTTCTGAAGAGCAGAAGCGAGTTCTCAGCAGAACACGTGTTGCTGTGAATCAAGCTATTGTTAAGGGGCTGTGACTGCTCCGCCTTGCCAGTCCGATCTGGGACTGGGCTTCTTCGGGTATGAGCAGATTCTGCCAGGCCTCAGACACCGGCAGTTCTCTGCATATCGCCCCTCCCCGTGTCAGT------GCGGTCAGCCTCACAATGATACACCCTCGGTGAAACCCGAGAGGTCTGAATTCAGGGGGAGGGAGAGGAGAAAGGGAGGTCATTCATGGATGCAGATCTGAAAAAATCCCCTAGCCGCCCCTCTGGGTGCTCTTAGGCCTTCCCCGTTGCTTCTAGCT---TTTCTTTCCATTGCATCTCAAGGCTCTTTGACCTCAGTCAGATTGCAAACCACCCTCAGATGTCAGCCCTGATCACTGACCAAGATGAAGACATGCTGAGCTACATGATCAACTTGGAGGTGAGGCCGGGAAGACTAAGGCTGGAGGGCTGAGTGGGGGAGGCTAAGGGAGATAACTTATTCCTGCAAGCAACAGTGGGCACCTCAGCCAAAAAGGTGTTTAAGCTTTCTCCACCTTGTCCGGACAGGTGAAAGAAGCGAAGCATCCCGTTCATCTCTGCCAGATCATGTTGTTCTTTCGGAGTAACCCCTACTTCCAGAATAAAGTGATTACCAAGGAATATCTCGTGAACGTCACAGGTGACAGGTGGCTCCCAGGATGGGTAGTGGAAGGAGGAAGGTGGGTGGATCAGTGCCAACGTGTTCCAGCCCCCTTACCAAAACATCCTCTGTCTGTAGAATACAGGGCTTCTCATTCCACTCCAATTCAGTGGTGTCAGGATTATGAAGTCGAGGCCTATCGCCGCAGACACAACAACGGCGGTCTTAACTTCTTCAACTGGTTTTCTGACCACAACTTCGCAGGATCCAATAGGATTGCTGAGGTGGGTCCTTGCTGGGAAACATGAGGAATGACCCCGGTGTGTTCCCAGCTGCTTGGGTCACCAGTCTGAGCTCTCATGAGGCCTTTTCCGATTGATTCCCC-TGACAGATCCTATGTAAGGACCTGTGGCGCAATCCCCTGCAATACTACAGGAGGACGAAGCCACCTGAAGAGGAAACAGAGATTTCAGGTGAGCCGTACAGTTGGAACTGGAGCTGTCTGATA-CCCAGGATAAGGGTGTTGACACACCTCTCTATTCAGGGAGCCTGGAGGCTCATTTCAGAAATGTAGAACCTGGGGGTCCGTCTTATCCATGTCGAAATTCCTTGAGAGGAAGACACAGCATGACAGAATCCAGGACATTCATGGCATTGGG-CCGAAAAAGGCACATGAGACACTGCACTGCAAAGCAGGTTATAACTGTGGAGTCTTAAGCCCGGGGAAGCATAGTGCGTGTCCCCACTCAC----------------------------------------------TGAGAAGTAAAGCCGAGTCATTACCTTCAATCTGTGGCACTTGGTTCCATGGCCGTCAACCCGACGGGGAGTCATCTTACCAACCCCTAAAGCTTGGGCTCCCCGAATGTGCCTGCTTGTCCTCCTTGCCACAGACCACAAAGGACTCTTTAGATCGATGGATTTC-CTTAAGCTATTACCCCATCGGATTTCCGTGTGCTTTTAGTGTACAACGCGTCTTGTTAGCTGACTCCTGTCACAGAGAATACTGGAAATGGGGCAGGTATTGCAGAGAATAGTCTGTAACACATGCACGGTAGGAGGAAGTTGAAGAGATCACAAAAGGGG--AAGGGGTAGTCTTTTCTCAGCAGGCCGTGAAATTAAAACATTTTAAATGGTGGCTCAGAGGAGATGCATTTT-GACACGTGTTTGTGTTTCTCTAGGGAACGCGCAGATGTTGGGTTGAATATGATGGAGCATCGGACACGGGTGCTGTGTTCACCTAACGCGGCAGAACTCCTGAAAACTTACTACAGTATGC  
P_hamadryas_73347                 AAGATGGAGCGGAGGCGCAAGCCCCACCTGGACCGCAGAGGCGCCATCATCCAGGGCATGCCTGGCTTCTGGGCCAACGTTGTATCCTTTGCAGTGTTTCTTCTGCTTTTCCAGTTGAGAGGTGCTCTTGGGAAGTGTAAGGAACTTACGGGCGGCTCGGCGTCGATGTGACCATTTGGGGAACAAGGGTGAGTTTCCACAGACAAATGTGGCTGAAGAAAGCCAGAGCAGACACGGGTACTATTTTCCTGCGTGCGTGAGAGAAACGCTTCATGGTGCCAGGCAGCAGACGTTTGGGGCATCTTTCTGAAGAGCAGAAGCGAGTTCTCAGCAGAACACGTGTTGCTGTGAATCAAGCTATTGTTAAGGGGCTGTGACTGCTCCGCCTTGCCAGTCCGATCTGGGACTGGGCTTCTTCGGGTATGAGCAGATTCTGCCAGGCCTCAGACACCGGCAGTTCTCTGCATATCGCCCCTCCCCGTGTCAGT------GCGGTCAGCCTCACAATGATACACCCTCGGTGAAACCCGAGAGGTCTGAATTCAGGGGGAGGGAGAGGAGAAAGGGAGGTCATTCATGGATGCAGATCTGAAAAAATCCCCTAGCCGCCCCTCTGGGTGCTCTTAGGCCTTCCCCGGTGCTTCTAGCT---TTTCTTTCCATTGCATCTCAAGGCTCTTTGACCTCAGTCAGATTGCAAACCACCCTCAGATGTCAGCCCTGATCACTGACCAAGATGAAGACATGCTGAGCTACATGATCAACTTGGAGGTGAGGCCGGGAAGACTAAGGCTGGAGGGTTGAGTGGGGGAGGCTAAGGGAGATAACTTATTCCTGCAAGCAACAGTGGGCACCTCAGCCAAAAAGGTGTTTAAGCTTTCTCCACCTTGTCCGGACAGGTGAAAGAAGCGAAGCATCCCGTTCATCTCTGCCAGATCATGTTGTTCTTTCGGAGTAACCCCTACTTCCAGAATAAAGTGATTACCAAGGAATATCTCGTGAACGTCACAGGTGACAGGTGGCTCCCAGGATGGGTAGTGGAAGGAGGAAGGTGGGTGGATCAGTGCCAACGTGTTCCAGCCCCCTTACCAAAACATCCTCTGTCTGTAGAATACAGGGCTTCTCATTCCACTCCAATTCAGTGGTGTCAGGATTATGAAGTCGAGGCCTATCGCCGCAGACACAACAACAGCGGTCTTAACTTCTTCAACTGGTTTTCTGACCACAACTTCGCAGGATCCAATAGGATTGCTGAGGTGGGTCCTTGCTGGGAAACATGAGGAATGACCCCGGTGTGTTCCCAGCTGCTTGGGTCACCAGTCTGAGCTCTCATGAGGCCTTTTCCGATTGATTCCCC-TGACAGATCCTATGTAAGGACCTGTGGCGCAATCCCCTGCAATACTACAGGAGGATGAAGCCACCTGAAGAGGAAACAGAGATTTCAGGTGAGCCGTACAGTTGGAACTGGAGCTGTCTGATA-CCCAGGATAAGGGTGTTGACACACCTCTCTATTCAGGGAGCCTGGAGGCTCATTTCAGAAATGTAGAACCTGGGGGTCCGTCTTATCCATGTTGAAATTCCTTGAGAGGAAGACACAGCATGACAGAATCCAGGACATTCATGGCATTGGG-CCGAAAAAGGCACATGAGACACTGCACTGCAAAGCAGGTTATAACTGTGGAGTCTTAAGCCCGGGGAAGCATAGTGCGTGTCCGCACTCAC----------------------------------------------TGAGAAGTAAAGCCGAGTCATTACCTTCAATCTGTGGCACTTGGTTCCATGGCCGTCAACCCGACGGGGAGTCATCTTACCAACCCCTAAAGCTTGGGCTCCCCGAATGTGCCTGGTTGTCCTGCTTGCCACAGACCACAAAGGACTCTTTAGATGGATGGATTTC-CTTAAGCTATTACCCCATCGGATTTCCGTGTGCTTTTAGTGTACAACGCGTCTTGTTAGCTGACTCCTGTCACAGAGAATACTGGAAATGGGGCAGGTATTGCAGAGAATAGTTTGTAACACATGCACGGTAGGAGGAAGTGGAAGAGATCACAAAAGGGG--AAGGGGTAGTCTTTTCTCAGCAGGCCGTGAAATTAAAACATTTTAAATGGTGGCTCAGAGGAGATGCATTTT-GACATGTGTTTGTGTTTCTCTAGGGAACGCGCAGATGTTGGGTTGAATATGATGGAGCATCGGACACGGGTGCTGTGTTCACCTAACACGGCAGAACTCCTGAAACCTTACTACAGTATGC  
T_cristatus_DJ_1                  ACGATGGAGCGCAGGCGCAAGCCCCACCTGGACCGCAGAGGCGCCATCATCCAGAGCATGCCTGGCTTCTGGGCCAATGTTGTATCCTTTGCAGTGTTTCTTCTGCATTTCCAGTTGCGAGGTGCTCTTGGGAAGTGTAAGGAACTTACGGGCAGCTGGGCGTCGATGTGACCCTTTGGGGAACAAGGATGAGTTTCCACAGACAAATGTGGCTGAAGAAAGCCAGAGCAGACACGAGTACTCTCTTCCTGCATGCGTGAGAGAAACCCTTCATGGTGCCAAGCGGCAGACGTTTGGGGCATCTTTCTGAAGAGCAGAAGCGAGTTCTCAGCAGAACCCGTGTTTCCGTGAATCAAGCTATTGTTAACGGACTGTGACTGCTCTCCCTTGCCAGTCCCATCTGGGACGTGGCGTCTTCGGGTATCAGCATATTCTGCCAGTCCTCAGACACCGGCAGA-------------------CCCGTGTCAGT------GCGCTCAGCATCGCAATGGTACACCCTCCGTGAA-CCCAAGAGGCCTGAATTCAGGGGGAGGGAGAGGAGAAAGGGAGGTCATTTATGGAYGCAGATCTGAAAAAATCCTCTAACCGCCCCTCTGGGTGCTCTTAGGCCTTCCCCGTTCCTTCTAGCT---TCCCTTTCCATTGCATCTCAAGGCTCTTTGACCTCAATCAGATTGCAAACCACCCTCGGATGTCAGCCCTGGTCACTGACGAAGATGAAGACATGCTGAGTTATATGATCAACTTGGAGGTGAGTCGGGGCAGAcTATGGCTGGAGGGCTGAGTGGGGGAGGCTAAGGGAGACAATTGATTCCTGCAAGCAACAGTGGGCACCTCACCCAAAAACGTGTTGAAGCTGTCTCCACCTTGTCCTGACAGGTGAAAGAAGCGAAGCATCCCATTCATCTCTGCCAGATCATGTTGTTCTTTCGGAATAACCCCTACTTCCAGAATAAAGTGATTACCAAGGAGTATCTCGTGAACGTCACAGGTGACGGGTGGCTCCCAGGATGGGCAGGGGAAGGAAGAAGGTGGGTGGATCaGTGCCAACGTGTTCCAGCCCCCTTCCCAAATAATCCTCTGTCTGTAGAATACAGGGCTTCGCATTCCACTCCAATTCAGTGGTGCCAGGATTATGAAGTTGAGGCCTATCGCCGCAGACACAACAGCAGCGGTCTTAACTTCTTCAACTGGTTTTCTGACCACAACTTCGCAGGATCCAGTAGGATTGCTGAGGTGGGTCCTTGCTGGGAAACATGAGGGATGACCCCCGTGTGTTCCCAGCTGCCCGGGTCCCCAGTCTGAGCtCTCACAAGGCCTTTTCCGATTGATTTCCC-TGACAGATCCTATGTGAGGACTTGTGGCGCAATCCCCTGCAATACTACAGGAGGATGAAGCCACCTGAGGAGGGAACAGAGATTTCAGGTGAGCTGTACAGTTGGAACTGGAGCTGTCTGATA-CCCAGGATAAGGGTGTAGACACACCTCTCTATTCAGGGAGCCCGGATGCTCATTTCAGAAATGTAGAAcCTGGGGGTCATT-TTATCCATGTAGAAATGCCTTGAGAGGAAGGCACAGCGTGACAGAATCCAGGACATTCATGGCATCGGG-CTGAAAGAGACACATGAGAcACGGCACTGCAAAGCAGgTTACAACTGTGGGGTCCTAAGCCCAGGGAAGCATAGCGCATGTCCAGACTCACATGCACTATGAGTCTGTAAATGAGACATTATGAGTCTCATTTACTATGAGAAGTAAAGCCGAATTATTAACTTCAATTTGTGGCCCTTGTTTCCATGGCCATCCACCCGACGGGGAGTCATCTTACCAACCCCTAAAGCTTGGGCTCCCTGAATGTGCCTGGTTGTCATCCTTGCCACAAACCACAAAGGACTGTTTAGATCAATGGATTTT-CTTGAGCTATTACCCCGTCAGATTTCTGTGTGCTCTTAGTGTAGAGTGCATCTTTTGAGCTGACTCCTGTCACAGAGAATACTGGAAATGGGGCAGGTATTGCCGAGAATAGTTTGTAACACATGCATGGGAGGAGGAAGTTGAAGAGATCACAGATGGGG--AAGGGGTAGTCATTTCTCAGCAGGCCCTGAAATTAAAACACTGTAAATCGTGGCTCAGAGGAGATGCATTTT-GACATATGTTTGTGTTTCTCTAGGGAAGGCGCAGATGTTGGGTTGAATATGATGGAGCATCGGACACAGATGCTGTGTTCACCTAACACAGCAGAACTCCTGAATACTTACTACAGTACAC  
C_preussi_008_B                   AAGATGGAGCGGAGGCGCAAGCCCCACCTGGACCGCAGAGGCGCCATCATCCAGAGCATGCCTGGCTTCTGGGCCAATGTTGTATCCTTTGCAGTGTTTCTTCTGCTTTTCCAGTTGAGAGGTGCTCTTGGGAAGTGTAAGGAACTTACGGGCGGCTCGGCGTCGATGTGACCATTTGGGGAACAAGGGTGGGTTTCCACAGACAAATGTGGCTGAAGAAAGCCAGAGCAGACACGGGTACTATTTTCCTGCGTGCGTGAGAGAAACGCTTCATGGTGCCAAGCAGCAGACGTTTGGGGCATCTTTCCCAAGAGCAGAAGCGAGTTCTCAGCAGAACACGTGTTGCTGTGAATCAAGCTATTGTTAAGGGACTGTGGCTGCTCCGCCTTGCCAGTCCGATCCGGGACTGGGCTTCTTCGGGTATGAGCAGATTCTGCCAGGCCTCAGACAGCGGCAGTTCTCTGCATATCGCCCCTCCCCGTGTCAGTTGTGAGGCGGTCAGCCTCACAATGATACACCCTCGGTGAAACCCGAGAGGTCTGAATTCAGGGGGAGGGAGAGGAGAAAGGGAGGTCATTCATGGATGCAGATCTGAAAAAATCCCCTAACCGCCCCTCTGGGTGCTCTTAGGCCTTCCCCGTTGCTTCTAGCT---TTTCTTTCCATTGCATCTCAAGGCTCTTTGACCTCAGTCAGATTGCAAACCACCCTCAGATGTCAGCCCTGATCACTGACCAAGATGAAGACATGCTGAGCTACATGATCAACTTGGAGGTGAGGCCGGGAAGACTAAGGCTGGAGGGTTGAGTGGGGGAGGCCAAGGGAGATAATTTCTTCCTGCAAGCAACAGTGGGCACCTCACCCAAAAAGGTGTTTAAGCTTTCTCCGCCTTGTCCTGACAGGTGAAAGAAGCGAAGCATCCCGTTCATCTCTGCCAGATCATGTTGTTCTTTCGGAGTAACCCCTACTTCCAGAATAAAGTGATTACCAAGGAATATCTCGTGAACGTCACAGGTGACAGGTGGCTCCCAGGATGGGTAGTGGAAGGAGGAAGGTGGGTGGATCAGTGCCAACGTGTTCCAGCCCCCTTACCAAAACGTCCTCTGTCTGTAGAATACAGGGCTTCTCATTCCACTCCAGTTCAGTGGTGTCAGGATTATGAAGTTGAGGCCTATCGCCGCAGACACAACAACAGCGGTCTTAACTTCTTCAACTGGTTTTCTGACCACAACTTCGCAGGATCCAATAGGATTGCTGAGGTGGGTCCTTGCTGGGAAACATGAGGAATGACCCCGGTGTGTTCCCAGCTGCTTGGGTCACCAGTCTGAGCTCTCATGAGGCCTTTTCCGATTGATTCCCC-TGACAGATCCTATGTAAGGACCTGTGGCGCAATCCCCTGCAATACTACAGGAGGATGAAGCCACCTGAAGAGGAAACAGAGATTTCAGGTGAGCCGTACAGTTGGAACTGGAGCTGTCTGATA-CCCAGGATAAGGGTGTTGACACACCTCTCTATTCAGGGAGCCTGGAGGCTCATTTCAGAAATGTAGAACCTGGGGGTCCGTCTTATCCGTGTCGAAATTCCTTGAGAGGAAGACACAGCATGACAGAAGCCAGGACATTCATGGCATTGGG-CTGAAAAGGGCACATGAGACACTGCACTGCAAAGCAGGTTATAACTGTGGACTCTTAAGCCCAGGGAAGCATAGTGCGTGTCCACACTCAC----------------------------------------------TGAGAAGTAAAGCCGAGTTATTGACTTCGATCTGTGGCACTGGGTTCCATGGCCGTCAACCCGACGGGGAGTCATCTTACCAACCCCTAAAGCTTGGGCTCCCCGAATGTGCCTGGTTGTCCTCCTTGCCACAGACCCCAAAGGACTGTTTAGATCCGTGGATTTT-CTGAAGCTATTACCCCATCGGATTTCCGTGTGCTTTTAGTGTACAACGCGTCCTGTTAGCTGACTCCCGTCACAGAGAATACTGGAAATGGGGCAGGTATTGCAGAGAATAGTTTGTAACCCATGCACGGTAGGAGGAAGTTGAAGAGATCACAAAAGGGG--AAGGGGTAGTCTTTTCTCAGCAGGCCGTAAAATTAAAACATTTTAAATGGTGGCTCAGAGGAGATGCATTTT-GACATGTGTTTGTGTTTCTCTAGGGAACGCGCAGATGTTGGGTTGAATATGATGGAGCATCGGACACAGGTGCTGTGTTCACCTAACACGGCAGAACTCCTGAAAACTTACTACAGTATGC
C_petaurista_1534                 AAGATGGAGCGGAGGCGCAAGCCCCACCTGGACCGCAGAGGCGCCATCATCCAGAGCATGCCTGGCTTCTGGGCCAATGTTGTATCCTTTGCAGTGTTTCTTCTGCTTTTCCAGTTGAGAGGTGCTCTTGGGAAGTGTAAGGAACTTACGGGCGGCTCGGCGTCCATGTGACCATTTGGGGAACGAGGGTGAGTTTCCACAGACAAATGTGGCTGAAGAAAGCCAGAGCAGACACGGGTACTATTTTCCTGCGTGCGTGAGAGAAACGCTTCATGGTGCCAAGCAGCAGACGTTTGGGGCATCTTTCTGAAGAGCAGAAGCGAGTTCTCGGCAGAACACGTGTTGCTGTGAATCAAGCTATTGTTAAGGGACTGTGACTGCTCCGCCTTGCCAGTCCSATCCGGGACTGGGCTTCTTCGGGTATGAGCAGATTCTGCCAGGCCTCAGACACCGGCAGTTCTCTGCATATCGCCCCTCCCGGTGTCAGT------GCGGTCAGCCTCGCAATGATACACCCTGGGTGAAACCCGAGAGGTCTGAATTCAGGGGGAGGGAGAGGAGAAAGGGAGGTCGTTCATGGATGCAGATCTGAAAAAATCCCCTAACCGCCCCTCTGGGTGCTCTTAGGCCTTCCCCGTTGCTTCTAGCT---TTTCTTCCCATTGCATCTCAAGGCTCTTTGACCTCAGTCAGATTGCAAACCACCCTCAGATGTCAGCCCTGATCACTGACCAAGATGAAGACATGCTGAGCTACCTGATCAACTTGGAGGTGAGGCCGGGAAGACTAAGGCTGGAGGGTTGAGTGGGGGAGGCTAAGGGAGATAATTTATTCCTGCAAGCAACAGTGGGCACCTCACCCAAAAAGGTGTTTAAGCTTTCTCCACCTTGTCCTGACAGGTGAAAGAAGCGAAGCATCCCGTTCATCTCTGCCAGATCATGTTGTTCTTTCGGAGTAACCCCTACTTCCAGAATAAAGTGATTACCAAGGAATATCTCGTGAACGTCACAGGTGACAGGTGGCTCCCAGGATGGGTAGTGGAAGGAGGAAGGTGGGTGGATCAGTGCCAACGTGTTCCAGCCCCCTTGCCAAAACATCCTCTGTCTGTAGAATACAGGGCTTCTCATTCCACTCCAATTCAGTGGTGTCAGGATTATGAAGTTGAGGCCTATCGCCGCAGACACAACAACAGCGGTCTTAACTTCTTCAACTGGTTTTCTGACCACAACTTTGCAGGATCCAATAGGATTGCTGAGGTGGGTCCTTGCTGGGAAACGTGAGGAATGACCCCGGTGTGTTCCCAGCTGCTCGGGTCACCAGTCTGAGCTCTCATGAGGCCTTTTCCGATTGATTCCCC-TGACAGATCCTATGTAAGGACCTGTGGCGCAATCCCCTGCAATACTACAGGAGGATGAAGCCACCTGAAGAGGAAACAGAGATTTCAGGTGAGCCGTACAGTTGGAACCGGAGCTGTCTGATAACCCAGGATAAGGGTGTTGACACACCTCTCTATTCAGGGAGCCTGGAGGCTCATTTCAGAAATGTAGAACCTGGGGGTCCGTCTTATCCATGTCGAAATTCCTTGAGAGGAAGACACAGCACGACAGAAGCCAGGACATTCATGGCATTGGG-CTGAAAAAGGCACATGAGACACTGCACTGCAAAGCAGGTTATAACTGTGGAGTCTTAAGCCCAGGGAAGCATAGTGCGTGTCCACACTCAC----------------------------------------------TGAGAAGTAAAGCCGAGTTATTAACTTCAATCTGTGGCACTTGGTTCCATGGCCGTCAACCCCACGGGGAGTCATCTTACCAACCCCTAAAGCTTGGGCTCCCCGAATGTGCCTGGTTGTCCTCCTTGCCACAGACCACAAAGGACTGCTTAGATCCATGGATTTT-CTGAAGCTATTACCCCACCGGATTTCCGTGTGCTTTTAGTGTACAACGCGTCTTGTTAGCTGACTCCTGTCACAGAGAATACTGGAAATGGGGCAGGTATTGCAGAGAAGAGTTTGTAACACATGCATGGTAGGAGGAAGTTGAAGAGATCACAAAAGGGG--AAGGGGTAGTCTTTTCTCAGCAGGCCGTAAAATTAAAACATTTTAAATGGTGGCTCAGAGGAGATGCATTTT-GACATGTGTTTGTGTTTCTCTAGGGAACGCGCAGATGTTGGGTTGAATATGATGGAGCATCGGACACGGGTGCTGTGTTCACCTAACACGGCAGAACTCCTGAAAACTTACTACAGTATGC
C_albogularis_89M009              AAGATGGAGCGGAGGCGCAAGCCCCACCTGGACCGCAGAGGCGCCATCATCCAGAGCATGCCTGGCTTCTGGGCCAATGTTGTATCCTTTGCAGTGTTTCTTCTGCTTTTCCAGTTGAGAGGTGCTCTTGGGAAGTGTAAGGAACTTACGGGCGGCTCGGCGTCGATGTGACCATTTGGGGAACGAGGGTGAGTTTCCACAGACAAATGTGGCTGAAGAAAGCCAGAGCAGACACGGGTACTATTTTCCTGCGTGCGTGAGAGAAACGCTTCATGGTGCCAAGCAGCAGACGTTTGGGGCATCTTTCTGAAGAGCAGAAGCGAGTTCTCGGCAGAGCACGTGTTGCTGTGAATCAAGCTATTGTTAAGGGACTGTGACTGCTCCGCCTTGCCAGTCCGATCCGGGACTGGGCTTCTTCGGGTATGAGCAGATTCTGCCAGGCCTCAGACACCGGCAGTTCTCTGCATATCGCCCCTCCCGGTGTCAGT------GCGGTCAGCCTCGCAATGATACACCCTCGGTGAAACCCGAGAGGTCTGAATTCAGGGGGAGGGAGAGGAGAAAGGGAGGTCGTTCATGGATGCAGATCTGAAAAAATCCCCTCACCGCCCCTCTGGGTGCTCTTAGGCCTTCCCCGTTGCTTCTAGCT---TTTCTTCCCATTGCATCTCAAGGCTCTTTGACCTCAGTCAGATTGCAAACCACCCTCAGATGTCAGCCCTGATCACTGACCAAGATGAAGACATGCTGAGCTACCTGATCAACTTGGAGGTGAGGCCGGGAAGACTAAGGCTGGAGGGTTGAGTGGGGGAGGCTAAGGGAGATAATTTATTCCTGCAAGCAACAGTGGGCACCTCACCCAAAAAGGTGTTTAAGCTTTCTCCACCTTGTCCTGACAGGTGAAAGAAGCGAAGCATCCCGTTCATCTCTGCCAGATCATGTTGTTCTTTCGGAGTAACCCCTACTTCCAGAATAAAGTGATTACCAAGGAATATCTCGTGAACGTCACAGGTGACAGGTGGCTCCCAGGATGGGTAGTGGAAGGAGGAAGGTGGGTGGATCAGTGCCAACGTGTTCCAGCCCCCTTGCCAAAACATCCTCTGTCTGTAGAATACAGGGCTTCTCATTCCACTCCAATTCAGTGGTGTCAGGATTATGAAGTTGAGGCCTATCGCCGCAGACACAACAACAGCGGTCTTAACTTCTTCAACTGGTTTTCTGACCACAACTTCGCAGGATCCAATAGGATTGCTGAGGTGGGTCCTTGCTGGGAAACGTGAGGAATGACCCCGGTGTGTTCCCAGCTGCTTGGGTCACCAGTCTGAGCTCTCATGAGGCCTTTTCCGATTGATTCCCC-TGACAGATCCTATGTAAGGACCTGTGGCGCAATCCCCTGCAATACCACAGGAGGATGAAGCCACCTGAAGAGGAAACAGAGATTTCAGGTGAGCCGTACAGTTGGAACCGGAGCTGTCTGATAACCCAGGATAAGGGTGTTGACACACCTCTCTATTCAGGGAGCCTGGAGGCTCATTTCAGAAATGTAGAACCTGGGGGTCCGTCTTATCCATGTCGAAATTCCTTGAGAGGAAGACACAGCATGACAGAAGCCAGGACTTTCATGGCATTGGG-CTGAAAAAGGCACATGAGACACTGCACTGCAAAGCAGGTTATAACTGTGGAGTCTTAAGCCCAGGGAAGCATAGTGCGTGTCCACACTCAC----------------------------------------------TGAGAAGTAAAGCCGAGTTATTAACTTCAATCTGTGGCACTTGGTTCCATGGCCGTCAACCCGACGGGGAGTCATCTTACCAACCCCTAAAGCTTGGGCTCCCCGAATGTGCCTGGTTGTCCTCCTTGCCACAGACCACAAAGGACTGCTTAGATCCATGGATTTT-CTGAAGCTATTACCCCATCGGATTTCCGTGTGCTTTTAGTGTACAACGCGTCTTGTTAGCTGACTCCTGTCACAGAGAATACTGGAAACGGGGCAGGTATTGCAGAGAATAGTTTGTAACACATGCATGGTAGGAGGAAGTTGAAGAGATCACAAAAGGGG--AAGGGGTAGTCTTTTCTCAGCAGGCCGTAAAATTAAAACATTTTAAACGGTGGCTCAGAGGAGATGCATTTT-GACATGTGTTTGTGTTTCTCTAGGGAACGCGCAGATGTTGGGTTGAATATGATGGAGCATCGGACACGGGTGCTGTGTTCACCTAACACGGCAGAACTCCTGAAAACTTACTACAGTATGC
C_erythrogaster_Mulhouse3         ????????????????????GCCCCACCTGGACCGCAGAGGCGCCATCATCCAGAGCATGCCTGGCTTCTGGGCCAATGTTGTATCCTTTGCAGTGTTTCTTCTGCTTTTCCAGTTGAGAGGTGCTCTTGGGAAGTGTGAGGAACTTACGGGCGGCTCGGCGTCCATGTGACCATTTGGGGAACGAGGGTGAGTTTCCACAGACAAATGTGGCTGAAGAAAGCCAGAGCAGACACGGGTACTATTTTCCTGCGTGCGTGAGAGAAACGCTTCATGGTGCCAAGCAGCAGACGTTTGGGGCATCTTTCTGAAGAGCAGAAGCGAGTTCTCGGCAGAACACGTGTTGCTGTGAATCAAGCTATTGTTAAGGGACTGTGACTGCTCCGCCTTGCCAGTCCGATCCGGGACTGGGCTTCTTCGGGTATGAGCAGATTCTGCCAGGCCTCAGACACCGGCAGTTCTCTGCATATCGCCCCTCCCGGTGTCAGT------GCGGTCAGCCTCGCAATGATACACCCTGGGTGAAACCCGAGAGGTCTGAATTCAGGGGGAGGGAGAGGAGAAAGGGAGGTCGTTCATGGATGCAGATCTGAAAAAATCCCCTAACCGCCCCTCTGGGTGCTCTTAGGCCTTCCCCGTTGCTTCTAGCT---TTTCTTCCCATTGCATCTCAAGGCTCTTTGACCTCAGTCAGATTGCAAACCACCCTCAGATGTCAGCCCTGATCACTGACCAAGATGAAGACATGCTGAGCTACCTGATCAACTTGGAGGTGAGGCCGGGAAGACTAAGGCTGGAGGGTTGAGTGGGGGAGGCTAAGGGAGATAATTTATTCCTGCAAGCAACAGTGGGCACCTCACCCAAAAAGGTGTTTAAGCTTTCTCCACCTTGTCCTGACAGGTGAAAGAAGCGAAGCATCCCGTTCATCTCTGCCAGATCATGTTGTTCTTTCGGAGTAACCCCTACTTCCAGAATAAAGTGATTACCAAGGAATATCTCGTGAACGTCACAGGTGACAGGTGGCTCCCAGGATGGGTAGTGGAAGGAGGAAGGTGGGTGGATCAGTGCCAACGTGTTCCAGCCCCCTTGCCAAAACATCCTCTGTCTGTAGAATACAGGGCTTCTCATTCCACTCCAATTCAGTGGTGTCAGGATTATGAAGTTGAGGCCTATCGCCGCAGACACAACAACAGCGGTCTTAACTTCTTCAACTGGTTTTCTGACCACAACTTTGCAGGATCCAATAGGATTGCTGAGGTGGGTCCTTGCTGGGAAACGTGAGGAATGACCCCGGTGTGTTCCCAGCTGCTTGGGTCACCAGTCTGAGCTCTCATGAGGCCTTTTCCGATTGATTCCCC-TGACAGATCCTATGTAAGGACCTGTGGCGCAATCCCCTGCAATACTACAGGAGGATGAAGCCACCTGAAGAGGAAACAGAGATTTCAGGTGAGCCGTACAGTTGGAACCGGAGCTGTCTGATAACCCAGGATAAGGGTGTTGACACACCTCTCTATTCAGGGAGCCTGGAGGCTCATTTCAGAAATGTAGAACCTGGGGGTCCGTCTTATCCATGTCGAAATTCCTTGAGAGGAAGACACAGCACGACAGAAGCCAGGACATTCATGGCATTGGG-CTGAAAAAGGCACATGAGACACTGCACTGCAAAGCAGGTTATAACTGTGGAGTCTTAAGCCCAGGGAAGCATAGTGCGTGTCCACACTCAC----------------------------------------------TGAGAAGTAAAGCCGAGTTATTAACTTCAATCTGTGGCACTTGGTTCCATGGCCGTCAACCCCACGGGGAGTCATCTTACCAACCCCTAAAGCTTGGGCTCCCCGAATGTGCCTGGTTGTCCTCCTTGCCACAGACCACAAAGGACTGCTTAGATCCATGGATTTT-CTGAAGCTATTACCCCACCGGATTTCCGTGTGCTTTTAGTGTACAACGCGTCTTGTTAGCTGACTCCTGTCACAGAGAATACTGGAAATGGGGCAGGTATTGCAGAGAATAGTTTGTAACACATGCATGGTAGGAGGAAGTTGAAGAGATCACAAAAGGGG--AAGGGGTAGTCTTTTCTCAGCAGGCCGTAAAATTAAAACATTTTAAATGGTGGCTCAGAGGAGATGCATTTT-GACATGTGTTTGTGTTTCTCTAGGGAACGCGCAGATGTTGGGTTGAATATGATGGAGCATCGGACACGGGTGCTGTGTTCACCTAACACGGCAGAACTCCTGAAAACTTACTACAGTATGC
M_mulatta_20156                   AAGATGGAGCGGAGGCGCAAGCCCCACCTGGACCGCAGAGGCGCCATCATCCAGAGCATGCCTGGCTTCTGGGCCAATGTTGTATCCTTTGCAGTGTTTCTTCTGCTTTTCCAGTTGAGAGGTGCTCTTGGGAAGTGTAAGGAACTTACGGGCGGCTCGGCGTCGATGTGACCATTTGGGGAACACGGGTGAGTGTCCACAGACAAATGTGGCTGAAGAAAGCCAGAGCAGACACGGGTACTATTTTCCTGCGTGCGTGAGAGAAACGCTTCATGGTGCCAAGCAGCAGACGTTTGGGGCATCTTTCTGAAGAGCAGAAGCGAGTTCTCAGCAGAACACGTGTTGCTGTGAATCAAGCTATTGTTAAGGGACTGTGACTGCTCCGCCTTGCCAGTCCGATCTGGGACTGGGCTTCTTCGGGTATGAGCAGATTCTGCCAGGCCTCAGACACCGGCAGTTCTCTGCATATCGCCCCTCCCCGTGTCAGT------GCGGTCAGCCTCACAATGATACACCCTCGGTGAACCCCGAGAGGTCTGAATTCAGGGGGAGGGAGAGGAGAAAGGGAGGTCATTCATGGATGCAGATCTGAAAAAATCCCCTAGCCGCCCCTCTGGGTGCTCTTAGGCCTTCCCCGTTGCTTCTAGCT---TTTCTTTCCGTTGCATCTCAAGGCTCTTTGACCTCAATCAGATTGCAAACCACCCTCAGATGTCGGCCCTGCTCACTGACCAAGATGAAGACATGCTGAGCTACATGATCAACTTGGAGGTGAGGCCGGGAAGACTAAGGCTGGAGGGTTGAGTGGGGGAGGGCAAGGGACATAATTTATTCCTGCAGGCAACAGTGGGCACCTCAGCCAAAAAGGTGTTTAAGCTTTCTCCACCTTGTCCGGACAGGTGAAAGAAGCGAAGCATCCCGTTCATCTCTGCCAGATCATGTTGTTCTTTCGGAGTAACCCCTACTTCCAGAATAAAGTGATTACCAAGGAATATCTCGTGAACGTCACAGGTGACAGGTGGCTCCCAGGATGGGTAGTGGAAGGAGGAAGGTGGGTGGATCAGTGCCAACGTGTTCCAGCCCCCTTACCAAAACATCCTCTGTCTGTAGAATACAGGGCTTCTCATTCCACTCCAATTCAGTGGTGTCAGGATTATGAAGTTGAGGCCTATCGCCGCAGACACAACAACAGCGGTCTTAACTTCTTCAACTGGTTTTCTGACCACAACTTCGCAGGATCCAATAGGATTGCTGAGGTGGGTCCTTGCTGGGAAACATGAGGAATGACCCCGGTGTGTTCCCAGCTGCTTGGGTCACCAGTCTGAGCTCTCATGAGGCCTTTTCCGGTTGATTCCCC-TGACAGATCCTATGTAAGGACCTGTGGCGCAATCCCCTGCAATACTACAGGAGGATGAAGCCACCTGAAGAGGAAACAGAGATTTCAGGTGAGGCGTACAGTTGGAACTGGAGCTGTCTGATA-CCCGGGATAAGGGTGTTGACACACCTCTCTATTCAGGGAGCCTGGAGGCTCATTTCAGAAATGTAGAACCTGGGGGTCCGTCTTATCCATGTGGAAATTCCTTGAGAGGAAGACACAGCATGACAGAATCCAGGACATTCATGGCATTGGG-CTGAAAAAGGCACATGAGACACTGCACTGCAAAGCAGGTTATAACTGTGGAGTCTTAAGCCCGGGGAAGCATAGTGCGTGTCCACACTCAC----------------------------------------------TGAGAAGTAAAGCCGAGTTATTACCTTCAATCTGTGGCACTTGGTTCCATGGCCGTCAACCCGACGGGGAGTCATCTTACCAACCCCTAAAGCTTGGGCTCCCGGAATGTGCCTGGTTGTCCTCCTTGCCACAGACCACAAAGGACTGTTTAGATCGATGGATTTC-CTTAAGCTATTACCCCATCGGATTTCCGTGTGCTTTTAGTGTACAACGCGTCTTGTTAGCTGACTCCTGTCACAGAGAATACTGGAAATGGGGCAGGTATTGCAGAGAATAGTTTGTAACACATGCACGGCAGGAGGAAGTTGAAGAGATCACAAAAGGGG--AAGGGGTAGTCTTTTCTCAGCAGGCCGTAAAATTAAAACATTTTAAATGGTGGCTCAGAGGAGATGCAATTT-GACATGTGTTTGTGTTTCTCTAGGGAACGCGCAGATGTTGGGTTGAATATGATGGAGCATCGGACACAGGTGCTGTGTTCACCTAACACGGCAGAACTCCTGAAAACTTACTACAGTATGC
M_talapoin_1511                   AAGATGGAGCGGAGGCGCAAGCCCCACCTGGACCGCAGAGGCGCCATCATCCAGAGCACGCCTGGCTTCTGGGCCAATGTTGTATCCTTTGCAGTGTTTCTTCTGCTTTTCCAGTTGAGAGGTGCTCTTGGGAAGTGTAAGGAACTTACGGGCGGCTCGGCGTCGATGTGACCATTTGGGGAACAAGGGTGAGTTTCCACAGACAAATGTGGCTGAAGAAAGCCAGAGCAGACACGGCTACCATTTTCCTGCGTGCCTGAGAGAAACGCTTCATGGTGCCAAGCAGCAGACGTTTGGGGCATCTTTCTGAAGAGCAGAAGCGAGTTCTCAGCAGAACACGTGTTGCTGTGAATCAAGCTATTGTTAAGGGACTGTGACTGCTCCGCCTTGCCAGTCCGATCCGGGACTGGGCATCCTCGGGTATGAGCAGATTCTGCCAGGCCTCAGACACCGGCAGTTCTCTGCATATCGCCCCTCCCCGTGTCAGT------GCGGTCAGCCTCACAATGATACACCCTCGGTGAAACCCGAGAGGTCTGAATTCAGGGGGAGGGAGAGGAGAAAAGGAGGTCGTTCATGGACGCAGATCTGAAAAAATCCCCTAAGCGCCCCTCTGGGTGCTCTTAGGCCTTCCCCGTTGCTTCTAGCTGCTTTTCTTTCCATTGCATCTCAAGGCTCTTTGACCTCAGTCAGATTGCAAACCACCCTCAGATGTCAGCCCTGATCACTGACCAAGATGAAGACATGCTGAGCTACATGATCAACTTGGAGGTGAGGCCGGGAAGACTAAGGCTGGAGGGTTGAGTGGGGGAGGCTAAGGGAGATAATTTATTCCTGCAAGCAACAGTGGGCACCTCACCCAAAAAGGTGTTTAAGCTTTCTCCACCTTGTCCTGACAGGTGAAAGAAGCGAAGCATCCCCTTCATCTCTGCCAGATCATGTTGTTCTTTCGGAGTAACCCCTACTTCCAGAATAAAGTGATTACCAAGGAATATCTCGTGAACGTCACAGGTGACAGGTGGCTCCCAGGATGGGTAGTGGAAGGAGGAAGGTGGGTGGATCAGTGCCAACGTGTTCCAGCCCCCCTGCCAAAACATCCTCTGTCTGTAGAATACAGGGCTTCTCATTCCACTCCAATTCAGTGGTGTCAGGATTATGAAGTTGAGGCCTATCGCCGCAGACACAACAACAGCGGTCTTAACTTCTTCAACTGGTTTTCTGACCACAACTTCGCGGGATCCAATAGGATTGCTGAGGTGGGTCCTTGCTGGGAAACATGAGGAATGACCCCGGTGTGTTCCCAGCTGCTTGGGTCACCAGTCTGAGCTCTCATGAGGCCTTTTCCGATTGATTCCCCCTGACAGATCCTATGTACGGACCTGTGGCGCAATCCCCTGCAATACTACAGGAGGATGAAGCCACCTGCAGAGGAAACAGAGATTTCAGGTGAGCCGTACAGTTGGAACTGGAGCTGTCTGATA-CCCAGGATAAGGGTGTTGACACACCTCTCAATTCAGGGAGCCTGGAGGCTCATTTCAGAAATGTAGAACCTGGGGGTCCGTCTTATCCGTGTCGAAATTCCTTGAGAGGAAGACACAGCATGACAGAAGCCGGGACATTCATGGCATTCGGGCTGAAAAAGGCACATGAGACACTGCACTGCAAAGCAGGTTGTAACTCTGGAGTCTTAAGCCCAGGGAAGCATAGCGCGTGTCCACACTCAC----------------------------------------------TGAGAAGTAAAGCCGCGTTATTAACTTCAATCTGTGGCCCTTGGTTCCGTGGCCGTCCACCCGACGGGGAGTCATCTTACCAACCCCTAAAGCTTGGGCTCCCCGAATGTGCCTGGTTGTCCTCCTTGCCACAGACCACAAAGGACTCTTTAGATCCATGGATTTT-CTGAAGCTATTACCCCATCGGATTTCCGTGTGCTTTTAGTGTACATCGCGTCTTGTTAGCTGACTCCTGTCACAGAGAATACGGGAAATGGGGCAGGTATTGCAGAGAATAGTTTGTAACCCACGCATGGTAGGAGGAAGTTGAAGAGATCACAAAAGGGGGGAAGGGGTAGTCTTTTCTCAGCAGGCCATAAAATTAAAACATTTTAAATGGTGGCTCAGAGGAGATGCAGTTT-GACATGTGTTTGTGTTTCTCTAGGGAACGCGCAGATGTTGGGTTGAATATGATGGAGCATCGGACACAGGTGCTGTGTTCACCGAACACGGCAGAACTCCTGAAAACTTACTACAGTATGC
C_pogonias_108_G                  AAGATGGAGCGGAGGCGCAAGCCCCACCTGGACCGCAGAGGCGCCATCATCCAGAGCATGCCTGGCTTCTGGGCCAATGTTGTATCCTTTGCAGTGTTTCTTCTGCTTTTCCAGTTGAGAGGTGCTCTTGGGAAGTGTAAGGAACTTACGGGCGGCTCGGCGTCGATGTGACCATTTGGGGAAGGAGGGTGAGTTTCCACAGACAAATGTGGCTGAAGAAAGCCAGAGCAGACACGGGTACTATTTTCCTGCGTGCGTGAGAGAAACGCTTCATGGTGCCAAGCAGCAGACGTTTGGGGCATCTTTCTGAAGAGCAGAAGCGAGTTCTCGGCAGAACACGTGTTGCTGTGAATCAAGCTGTTGTTAAGGGACTGTGACTCCTCCGCCTTGCCAGTCCGATCCGGGACTGGGCTTCTTCGGGTATGAGCAGATTCTGCCAGGCCTCAGACACCGGCAGTTCTCTGCATATCGCCCCTCCCGGTGTCAGT------GCGGTCAGCCTGGCAATGATACCGCCTCGGTGAAACCCGAGAGGTCTGAATTCAGGGGGAGGGAGAGGAGAAAGGGAGGTCGTTCATGGATGCAGGTCTGAAAAAATCCCCTAACCGCCCCTCTGGGTGCTCTTAGGCCTTCCCCGTTGCTTCTAGCT---TTTCTTCCCATTGCATCTCAAGGCTCTTTGACCTCAGTCAGATTGCAAACCACCCTCAGATGTCAGCCCTGATCACTGACCAAGATGAAGACATGCTGAGCTACCTGATCAACTTGGAGGTGAGGCCGGGAAGACTAAGGCTGGAGGGTTGAGTGGGGGAGGCTAAGGGAGATAATTTATTCCTGCAAGCAACAGTGGGCACCTCACCCAAAAAGGTGTTTAAGCTTTCTCCACCTTGTCCTGACAGGTGAAAGAAGCGAAGCATCCCGTTCATCTCTGCCAGATCATGTTGTTCTTTCGGAGTAACCCCTACTTCCAGAATAAAGTGATTACCAAGGAATATCTCGTGAACGTCACAGGTGACAGGTGGCTCCCAGGATGGGCAGTGGAAGGAGGAAGGTGGGTGGATCAGTGCCAACGTGTTCCAGCCCCCTTGCCAAAACATCCTCTGTCTGTAGAATACAGGGCTTCTCATTCCACTCCAATTCAGTGGTGTCAGGATTATGAAGTTGAGGCCTATCGCCGCAGACACAACAGCAGCGGTCTTAACTTCTTCAACTGGTTTTCTGACCACAACTTCGCAGGATCCAATAGGATTGCTGAGGTGGGTCCTTGCTGGGAAACGTGAGGAATGACCCCGGTGTGTTCCCAGCTGCTTGGGTCACCAGTCTGAGCTCTCATGAGGCCTTTTCCGATTGATTCCCC-TGACAGATCCTATGTAAGGACCTGTGGCGCAATCCCCTGCAATACTACAGGAGGATGAAGCCACCTGAAGAGGAAACAGAGATTTCAGGTGAGCCGTACAGTTGGAACCGGAGCTTTCCGATA-CCCAGGATAAGGGTGTTGACACACCTCTCTATTCTGGGAGCCTGGAGGCTCATTTCAGAAATGTAGAACCTGGGGGTCCGTCTTATCCATGTCGAAATTCCTTGAGAGGAAGATACAGCATGACACAAGCCAGGACATTCATGGCATTGGG-CTGAAAAAGGCACATGAGACACTGCACTGCAAAGCAGGTTATAACTGTGGAGTCTTAAGCCCAGGGAAGCATAGTGCGTGTCCACACTCAC----------------------------------------------TGAGAAGTAAAGCCGAGTTATTAACTTCAATCTGTGGCACTTGGTTCCATGGCCGTCAACCCGACGGGGAGTCATCTTACCAACCCCTAAAGCTTGGGCTCCCCGAATGTGCCTGGTTGTCCTCCTTGCCACAGACCACAAAGGACTGCTTAGATCCATGGATTTT-CTGAAGCTATTACCCCATCGGATTTCCGTGTGCTTTTAGTGTACAACGCGTCTTGTTAGCTGACTCCTGTCACAGAGAATACTGGAAATGGGGCAGGTATTGCAGAGAATAGTTTGTAACACATGCATGGTAGGAGGAAGTTGAAGAGATCACAAAAGGGG--AAGGGGTAGTCTTTTCTCAGCAGGCCGTAAAATTAAAACATTTTAAATGGTGGCTCAGAGGAGATGCATTTT-GACATGTGTTTGTGTTTCTCTAGGGAACGCGCAGATGTTGGGTTGAATATGATGGAGCATCGGACACGGGTGCTGTGTTCACCTAACACGGCAGAACTCCTGAAAACTTACTACAGTATGC
C_aethiops_90_017                 AAGATGGAGCGGAGGCGCAAGCCCCACCTGGACCGCAGAGGCGCCATCATCCAGAGCATGCCTGGCTTCTGGGCCAATGTTGTATCCTTTGCAGTGTTTCTTCTGCTTTTCCAGTTGAGAGGTGCTCTTGGGAAGTGTAAGGAACTTACGGGCGGCTCGGCGTCGATGTGACCATTTGGGGAACAAGGGTGGGTTTCCACAGACAAATGTGGCTGAAGAAAGCCAGAGCAGACACGGGTACTATTTTCCCGCGTGCGTGAGAGAAACGCTTCATGGTGCCAAGCAGCAGACGTTTGGGGCATCTTTCCGAAGAGCAGAAGCGAGTTCTCAGCAGAACACGTGTTGCTGTGAATCAAGCTATTGTTAAGGGACTGTGACTGCTCCGCCTTGCCAGTCCCATCCGGGACTGGGCTTCTTCGGGTATGAGCAGATTCTGCCAGGCCTCAGACACCGGCAGTTCTCTGCATATCGCCCCTCCCCGTGTCAGTTGTGAGGCGGTCAGCCTCACAATGATACACCCTCGGTGAAACCCGAGAGGTCTGAATTCAGGGGGAGGGAGAGGAGAAAGGGAGGTCATTCATGGATGCAGATCTGAAAAAATCCCCTAACCGCCCCTCTGGGTGCCCTTAGGCCTTCCCCGTTGCTTCTAGCT---TTTCTTTCCATTGCATCTCAAGGCTCTTTGACCTCAGTCAGATTGCAAACCACCCTCAGATGTCAGCCCTGATCACTGACCAAGATGAAGACATGCTGAGCTACATGATCAACTTGGAGGTGAGGCCGGGAAGACTAAGGCTGGAGGGTTGAGTGGGGGAGGCTAAGGGAGATAATTTATTCCTGCAAGCAACAGTGGGCACCTCACCCAAAAAGGTGTTTAAGCTTTCTCCACCTTGTCCTGACAGGTGAAAGAAGCGAAGCATCCCGTTCATCTCTGCCAGATCATGTTGTTCTTTCGGAGTAACCCCTACTTCCAGAATAAAGTGATTACCAAGGAATATCTCGTGAACGTCACAGGTGACAGGTGGCTCCCAGGATGGGTAGTGGAAGGAGGAAGGTGGGTGGATCAGTGCCAACGTGTTCCAGCCCCCTTACCACAACGTCCTCTGTCTGTAGAATACAGGGCTTCTCATTCCACTCCAGTTCAGTGGTGTCAGGATTATGAAGTTGAGGCCTATCGCCGCAGACACAACAACAGCGGTCTTAACTTCTTCAACTGGTTTTCTGACCACAACTTCGCAGGATCCAATAGGATTGCTGAGGTGGGTCCTTGCTGGCAAGCATGAGGAATGACCCCGGTGTGTTCCCAGCTGCTTGGGTCACCAGTCTGAGCTCTCATGAGGCCTTTTCCGATTGATTCCCC-TGACAGATCCTGTGTAAGGACCTGTGGCGCAATCCCCTGCAATACTACAGGAGGATGAAGCCACCTGAAGAGGAAACAGAGATTTCAGGTGAGCCGTACAGTTGGAACTGGAGCTGTCTGATA-CCCAGGATAAGGGTGTTGACACACCTCTCTATTCAGGGAGCCTGGAGGCTCGTTTCAGAAATGTAGAACCTGGGGGTCCGTCTTATCCATGTCGAAATTCCTTGAGAGGAAGACACAGCATGACAGAAGCCAGGACATTCATGGCATTGGG-CTGAAAAAGGCACATGAGACACTGCACTGCAAAGCAGGTTATAACTGTGGAGCCTTAAGCCCAGGGAAGCATAGTGCGAGTCCACCCTCAC----------------------------------------------TGAGAAGTAAAGCCGAGTTATTAACTTCAATCTGTGGCACTTGGTWCCATGGCCGTCAACCCGACGGGGAGTCATCTTACCAACCCCTAAAGCCTGGGCTCCCCGAATGTGCCTGGTTGTCCTCCTTGCCACAGACCACAAAGGACTGTTTAGATCCATGGATTTT-CTGAGGCTATTACCCCATCGGATTTCCGTGTGCTTTTAGTGTACAACGCGTCTTGTTAGCTGACTCCTGTCACAGAGAATACTGGAAATGGGGCAGGTATTGCAGAGAATAGTTTGTAACCCATGCACGGTAGGAGGAAGTTGAAGAGATCACAAAAGGGG--AAGGGGTAGTCTTTTCTCAGCAGGCCGTAAAATTAAAACATTTTAAATGGTGGCTCAGAGGAGATGCATTTTTGACATGTGTTTGTGTTTCTCTAGGGAACGCGCAGATGTTGGGTTGAATATGATGGAGCATCGGACACAGGTGCTGTGTTCACCTAACACGGCAGAACTCCTGAAAACTTACTACAGTATGC
C_ascanius_41137B                 AAGATGGAGCGGAGGCGCAAGCCCCACCTGGACCGCAGAGGCGCCATCATCCAGAGCATGCCTGGCTTCTGGGCCAATGTTGTATCCTTTGCAGTGTTTCTTCTGCTTTTCCAGTTGAGAGGTGCTCTTGGGAAGTGTAAGGAACTTACGGGCGGCTCGGCGTCGATGTGACCATTTGGGGAACGAGGGTGAGTTTCCACAGACAGATGTGGCTGAAGAAAGCCAGAGCAGACACGGGTACTATTTTCCTGCGTGCGTGAGAGAAACGCTTCATGGTGCCAAGCAGCAGACGTTTGGGGCATCTTTCTGAAGAGCAGAAGCGAGTTCTCGGCAGAACACGTGTTGCTGTGAATCAAGCTATTGTTAAGGGACTGTGACTGCTCCGCCTTGCCAGTCCGATCCGGGACTGGGCTTCTTCGGGTATGAGCAGATTCTGCCAGGCCTCAGACACCGGCAGTTCTCTGCATATCGCCCCTCCCGGTGTCAGT------GCGGTCAGCCTCGCAATGATACACCCTGGGTGAAACCCGAGAGGTCTGAATTCAGGGGGAGGGAGAGGAGAAAGGGAGGTCGTTCATGGATGCAGATCTGAAAAAATCCCCTAACCGCCCCTCTGGGTGCTCTTAGGCCTTCCCCGTTGCTTCTAGCT---TTTCTTCCCATTGCATCTCAAGGCTCTTTGACCTCAGTCAGATTGCAAACCACCCTCAGATGTCAGCCCTGATCACTGACCAAGATGAAGACATGCTGAGCTACCTGATCAACTTGGAGGTGAGGCCGGGAAGACTAAGGCTGGAGGGTTGAGTGGGGGAGGCTAAGGGAGATAATTTATTCCTGCAAGCAACAGTGGGCACCTCACCCAAAAAGGTGTTTAAGCTTTCTCCACCTTGTCCTGACAGGTGAAAGAAGCGAAGCATCCCGTTCATCTCTGCCAGATCATGTTGTTCTTTCGGAGTAACCCCTACTTCCAGAATAAAGTGATTACCAAGGAATATCTCGTGAACGTCACAGGTGACAGGTGGCTCCCAGGATGGGTAGTGGAAGGAGGAAGGTGGGTGGATCAGTGCCAACGTGTTCCAGCCCCCTTGCCAAAACATCCTCTGTCTGTAGAATACAGGGCTTCTCATTCCACTCCAATTCAGTGGTGTCAGGATTATGAAGTTGAGGCCTATCGCCGCAGACACAACAACAGCGGTCTTAACTTCTTCAACTGGTTTTCTGACCACAACTTCGCAGGATCCAATAGGATTGCTGAGGTGGGTCCTTGCTGGGAAACGTGAGGAATGACCCCGGTGTGTTCCCAGCTGCTTGGGTCACCAGTCTGAGCTCTCATGAGGCCTTTTCCGATTGATTCCCC-TGACAGATCCTATGTAAGGACCTGTGGCGCAATCCCCTGCAATACTACAGGAGGATGAAGCCACCTGAAGAGGAAACAGAGATTTCAGGTGAGCCGTACAGTTGGAACCGGAGCTGTCTGATAACCCAGGATAAGGGTGTTGACACACCTCTCTATTCAGGGAGCCTGGAGGCTCATTTCAGAAATGTAGAACCTGGGGGTCCGTCTTATCCATGTCGAAATTCCTTGAGAGGAAGACACAGCACGACAGAAGCCAGGACATTCATGGCATTGGG-CTGAAAAAGGCACATGAGACACTGCACTGCAAAGCAGGTTATAACTGTGGAGTCTTAAGCCCAGGGAAGCATAGTGCGTGTCCACACTCAC----------------------------------------------TGAGAAGTAAAGCCGAGTTATTAACTTCAATCTGTGGCACTTGGTTCCATGGCCGTCAACCCCACGGGGAGTCATCTTACCAACCCCTAAAGCTTGGGCTCCCCGAATGTGCCTGGTTGTCCTCCTTGCCACAGACCACAAAGGACTGCTTAGATCCATGGATTTT-CTGAAGCTATTACCCCACCGGATTTCCGTGTGCTTTTAGTGTACAACGCGTCTTGTTAGCTGACTCCTGTCACAGAGAATACTGGAAATGGGGCAGGTATTGCAGAGAATAGTTTGTAACACATGCATGGTAGGAGGAAGTTGAAGAGATCACAAAAGGGG--AAGGGGTAGTCTTTTCTCAGCAGGCCGTAAAATTAAAACATTTTAAATGGTGGCTCAGAGGAGATGCATTTT-GACATGTGTTTGTGTTTCTCTAGGGAACGCGCAGATGTTGGGTTGAATATGATGGAGCATCGGACACGGGTGCTGTGTTCACCTAACACGGCAGAACTCCTGAAAACTTACTACGGTATGC
;
END;

BEGIN PAUP;
Lset  Base=(0.2299 0.2594 0.2855)  Nst=2  TRatio=1.2353  Rates=gamma  Shape=0.7748  Pinvar=0;
END;


BEGIN CODONS;
	CODONPOSSET * CodonPositions = 
		N: 1-2290;
	CODESET  * UNTITLED = Universal: all ;
END;

BEGIN MRBAYES;

	
	outgroup TcristDJ1;

	unlink shape=(all) pinvar=(all) statefreq=(all) revmat=(all);
	prset applyto=(all) ratepr=variable;
	lset applyto=(all) nst=2  rates=gamma;
	
	set autoclose = yes;
	mcmc ngen=1000000 printfreq=100 samplefreq=100 nchains=4 nruns=2 savebrlens=yes;
	sumt burnin=2500;
	sump burnin=2500;
END;


BEGIN ASSUMPTIONS;
	OPTIONS  DEFTYPE=unord PolyTcount=MINSTEPS ;
END;
