# Supplementary material for: Lesula: A New Species of Cercopithecus Monkey Endemic to the Democratic Republic of Congo and Implications for Conservation of Congo’s Central Basin
Source: PLoS One. 2012 Sep 12;7(9):e44271. doi: 10.1371/journal.pone.0044271 (PMC3440422; doi:10.1371/journal.pone.0044271)
Supplement: Matrix S2 — DNA sequence alignment for the Xq13.3 homolog. (NEX) [file pone.0044271.s018.nex]

#NEXUS 

BEGIN DATA;
	DIMENSIONS  NTAX=28 NCHAR=4853;
	FORMAT DATATYPE=DNA  MISSING=? GAP=- ;
MATRIX
[                                    10        20        30        40        50        60        70        80        90        100       110       120       130       140       150       160       170       180       190       200       210       220       230       240       250       260       270       280       290       300       310       320       330       340       350       360       370       380       390       400       410       420       430       440       450       460       470       480       490       500       510       520       530       540       550       560       570       580       590       600       610       620       630       640       650       660       670       680       690       700       710       720       730       740       750       760       770       780       790       800       810       820       830       840       850       860       870       880       890       900       910       920       930       940       950       960       970       980       990       1000      1010      1020      1030      1040      1050      1060      1070      1080      1090      1100      1110      1120      1130      1140      1150      1160      1170      1180      1190      1200      1210      1220      1230      1240      1250      1260      1270      1280      1290      1300      1310      1320      1330      1340      1350      1360      1370      1380      1390      1400      1410      1420      1430      1440      1450      1460      1470      1480      1490      1500      1510      1520      1530      1540      1550      1560      1570      1580      1590      1600      1610      1620      1630      1640      1650      1660      1670      1680      1690      1700      1710      1720      1730      1740      1750      1760      1770      1780      1790      1800      1810      1820      1830      1840      1850      1860      1870      1880      1890      1900      1910      1920      1930      1940      1950      1960      1970      1980      1990      2000      2010      2020      2030      2040      2050      2060      2070      2080      2090      2100      2110      2120      2130      2140      2150      2160      2170      2180      2190      2200      2210      2220      2230      2240      2250      2260      2270      2280      2290      2300      2310      2320      2330      2340      2350      2360      2370      2380      2390      2400      2410      2420      2430      2440      2450      2460      2470      2480      2490      2500      2510      2520      2530      2540      2550      2560      2570      2580      2590      2600      2610      2620      2630      2640      2650      2660      2670      2680      2690      2700      2710      2720      2730      2740      2750      2760      2770      2780      2790      2800      2810      2820      2830      2840      2850      2860      2870      2880      2890      2900      2910      2920      2930      2940      2950      2960      2970      2980      2990      3000      3010      3020      3030      3040      3050      3060      3070      3080      3090      3100      3110      3120      3130      3140      3150      3160      3170      3180      3190      3200      3210      3220      3230      3240      3250      3260      3270      3280      3290      3300      3310      3320      3330      3340      3350      3360      3370      3380      3390      3400      3410      3420      3430      3440      3450      3460      3470      3480      3490      3500      3510      3520      3530      3540      3550      3560      3570      3580      3590      3600      3610      3620      3630      3640      3650      3660      3670      3680      3690      3700      3710      3720      3730      3740      3750      3760      3770      3780      3790      3800      3810      3820      3830      3840      3850      3860      3870      3880      3890      3900      3910      3920      3930      3940      3950      3960      3970      3980      3990      4000      4010      4020      4030      4040      4050      4060      4070      4080      4090      4100      4110      4120      4130      4140      4150      4160      4170      4180      4190      4200      4210      4220      4230      4240      4250      4260      4270      4280      4290      4300      4310      4320      4330      4340      4350      4360      4370      4380      4390      4400      4410      4420      4430      4440      4450      4460      4470      4480      4490      4500      4510      4520      4530      4540      4550      4560      4570      4580      4590      4600      4610      4620      4630      4640      4650      4660      4670      4680      4690      4700      4710      4720      4730      4740      4750      4760      4770      4780      4790      4800      4810      4820      4830      4840      4850]
[                                    .         .         .         .         .         .         .         .         .         .         .         .         .         .         .         .         .         .         .         .         .         .         .         .         .         .         .         .         .         .         .         .         .         .         .         .         .         .         .         .         .         .         .         .         .         .         .         .         .         .         .         .         .         .         .         .         .         .         .         .         .         .         .         .         .         .         .         .         .         .         .         .         .         .         .         .         .         .         .         .         .         .         .         .         .         .         .         .         .         .         .         .         .         .         .         .         .         .         .         .         .         .         .         .         .         .         .         .         .         .         .         .         .         .         .         .         .         .         .         .         .         .         .         .         .         .         .         .         .         .         .         .         .         .         .         .         .         .         .         .         .         .         .         .         .         .         .         .         .         .         .         .         .         .         .         .         .         .         .         .         .         .         .         .         .         .         .         .         .         .         .         .         .         .         .         .         .         .         .         .         .         .         .         .         .         .         .         .         .         .         .         .         .         .         .         .         .         .         .         .         .         .         .         .         .         .         .         .         .         .         .         .         .         .         .         .         .         .         .         .         .         .         .         .         .         .         .         .         .         .         .         .         .         .         .         .         .         .         .         .         .         .         .         .         .         .         .         .         .         .         .         .         .         .         .         .         .         .         .         .         .         .         .         .         .         .         .         .         .         .         .         .         .         .         .         .         .         .         .         .         .         .         .         .         .         .         .         .         .         .         .         .         .         .         .         .         .         .         .         .         .         .         .         .         .         .         .         .         .         .         .         .         .         .         .         .         .         .         .         .         .         .         .         .         .         .         .         .         .         .         .         .         .         .         .         .         .         .         .         .         .         .         .         .         .         .         .         .         .         .         .         .         .         .         .         .         .         .         .         .         .         .         .         .         .         .         .         .         .         .         .         .         .         .         .         .         .         .         .         .         .         .         .         .         .         .         .         .         .         .         .         .         .         .         .         .         .         .         .         .         .         .         .         .         .         .         .         .         .         .         .         .         .         .         .         .         .         .         .         .         .         .         .         .         .         .         .         .         .         .         .         .         .         .         .         .         .         .         .         .         .         .         .         .         .         .         .         .         .         .         .         .         .         .         .         .         .         .         .         .         .         .         .         .         .         .         .         .         .         .         .         .         .         .         .         .         .         .         .         .         .         .         .         .         .   ]

C_hamlyni_GP612            TTTCCTTTGCAGGGACATGGATGGAGTTGGAAGTCATTATCCTCAGCAATCTAATGCAGGAATTGAAAACCAAACACCACATGTTCTCACTTATAAATGGGAGCTGAATTATGAGAACACATGGACACATGGTGAGAAACAACAAACATTGGAGTCTGTTGGGGGCTGTTTGGTGAGAGAGAGCATCAGGAAGAATAGCTAATGGATGCTGGGCTGAATAATTAGGTGATGGGATGATCTTTTCAGCAAATGACCATGACACACATTTACCTCTGTCACAACCTTGCACATCCTGCATATGTATCCCTAAACTTAAAGTAAAAGTTGAAGAAAAAAAA--TGGAAAGAAAAACAAAGATCAAAGTATGTCTCTAAAGATATTCCTGATAATAAAAATGGCACAATGTTATGACTAAAACTTCATCATATTCCTTTTTTACCTGAAGCCCAATTCAGAGGTCAATA-----CTTCTGTCTCAATATTGCATCTCAACTCCCATTTTTTCCTTACATCAGGCAACCCTACTCTCACTCCCCTCTTCTTCAAACTCCTACTGAATTTGTAGGCTGCACTGTGAGAAGGTAAGACTACAGAGCATAGGCACATATTAACAGAGCCTTAGGCATTTTTGCTTGTAAAGTCTCTCCCATGAACCACTCTCCCAAACAACAACCATAATCTTTCTCCTTTCTGCTACTGAAGAAAATGTGGTCAAAGCAAGAATAATAAGGTTTTGGTCTAAGAAATCTGAACACCTAAGAGCTTAAAAGCAGGCAATCCAGCTTTCTATTTGAAATCCAACAGGAATCCCTTAAGCTTAATTAGGAATTTGGTCACTGAAAACTTTATTTTATGGAAATAACTAAATGTTTTCTCACAATACAAATGTGTGGCAGGTCTTTAAATGTGATTCATTGGAGCTGAGTCCAAAACCTTACTAGATACTAGTACCATCTACCCCAAAGCAGCTGCTCTTTCCAACCAACTAGCTCAGCGTTGTGGTTTTCACAAAGTTACAGCCAAAGTGAGCTTATATTATTATGGCATCAGAATTTATATTAGTTTTCTAAGTCCCAGTGAAGAAATTTCCACATCCTGTCAGTAACTAGCTAAGTGCTATTCACATGTTACCTCTAATCTTTGTAAGAATTCTGAGTTAATTATTACTATAATCCTTTACAGATTAGAAAATGGAGTCTCAGCAGGAGTAAGTGACTTTCTGCAAGTCAGAGTTATTATGATTTTAACTGTAATAAGGCTTTTCATAAGCAC-GAAAGTTGAAGTTATTTTTAACTGAATAACTTATTATATGGACAGAAACATATTTTAAAGTGGTATTTCTGTGGATAAGACTGTTCCTCGGAGATTAAAAAAA----------GCTATTGTTTTCGGTTCTAGTTCTAGCAGTTTTATGCATACGCACTACGCATATAAGGCAAATTGCCGCCCACAAGGTGTCAGGATAGGGTTATATCAAAACTAACGTTCTTTATGGAGTTGTGCTTATGAATTCAAATTATAACAAATCTGCAGATAGAAGTACTGGAAGAATTTCTTTACAACAGGAATGAACTGAGCAGGACAAGACTTGCTGTAAGATAGAGAAGACTCAAAAGCAGTAGAATTTTTAGAAAAATGTACTGGATTTGTAGCTAAGATACTTGGATATCGGTAATATTTAAATATTATTTGTGCTGCTCTGATATGCTCTTTCCCTTCTGTGAGTTTCATTTCCTCATTATTAAAATAATATGATTTAAACTAGATGACCTTTAACTCCCTTCTAGCTCTCATTTGGCATGATTTCATGAGCATTCCCCCTCTGAATCCTGCCCCTAACTAATACCATCACCATTGCGACTGCTGCCACTTATGCAGCTGGTACCAACTCCATAAATCTTCGCTCTCAATCTTCCCCGTCTTTTCACCACTCATCAGTAAGTCACTGGCACCACTAAGTAAACATGTTTATCAAATTTACTTCTCCATTTTATATGATGCTGAAGCCTGTCTGTGGGTTTGTCATCCTGGGAGGAGAAGAAATAATTAAACAGAAAAAAA-GTTGCTGATGGGGGCCCCTCCCACTCTCTAGAGGACAACTTTTAAATGTCATCTGGGAACTGAACTTGCTTTGCCTCATCTTACATTTTTCTTTTATTTTTAACCACTAAATTTCACATGAATTATCCAAAACAATCTGATCTCCATGACCCTGGTGTTCTTCATTCAGCCGCTTACAACCAGAACCAAAGAGTAGCAGCTAGAATTGGAAACTCTGCTGTTTCCTGAATAAATCTATATCAACTCCAAATAAGCCTGTTTGACATCCAAAACACACAAATTTGGACACATTCTGCAAGTATAGACATTTTCCTCTGTTAGGGGAAGTGAAAATTATTTTTATCCTTAAAATGAATTAAAGCAATTA-GACCGCTACCAAGCAACAACTTAAAGTTTGAATCTGAACTTTTACGCATGAATCTGTATTGGATTTTCAATCATTTAGGAAGGTGGCCTAATTAGATATAATTTTTGCAGTTGTTGCAGCATTTTATGGGTGGAAATAATCATGTTCTTTGGGAAGACCTGGTATCATATCATGTCTCAGTTGTTGGCTCTCTGGCCTGAAACAATTCACTTCATATCCCCGGGCTTCAGTTTCCTCTTTTGTAAAATTAGAATAGTTTCTGCCACATAATTTGTTTTAAACATTAAAGAAAAATGTGTGTGAAAATAATAATCTGAGTAAACAGAAAACCCCCAGAATGGGAGAAAATATTTGCAGACTACGCATCTGACAAAGGACTAGAAACTAGAATCTACAAGGAACTCAAACAAGTCAACAATAGAAAAAGAAATATTCTCGTTATAAAGTGCTCAAAGGACATAAACAGAGATTCCTCAAAAGAAGATATACAAATGGCCAACAACCATGAAAAAA-TGTTCGACATCACTAATGATCAGATAAATGCAAATTAAATCCAGAATAAAATAGCACCTTACTGCAAATGGCTATTATTAAAAAGTCAAGAAAAATAGATGCTGGTATGTTTGTGGATAAAAGAGAATGCTTCTACACTGCTGGTGGGAATGTAAATTAATACAATTTCTATAGAAAACAGTATGGAGCTTCCTTAAAGAGCTACAAGTAAATCTACCATTTGATACAGCAATCCTACTAATCACAATTGCAAAGATGTGTAATGAATCTATGTGCCAATTGACTAATGAGTGGATAAAGTAAACGTGGTATATATATA--CTATGGAATACTCCTCTGCCATAAAAAGGATCGCAGTAATGTATTTTGCAGTAACTTGGATGGAGCTGGAGTCCACTATTCTAAGTAAAATAACACAAGAGTGAAAAATAATAATA---TAAAAAGATGTTCCCAATTATAAGTGACAGATAAGCTACGATTATGCAAAGGTATACAGAGTGATATAATGGAATCTAGAGACTCAGAAGGGGGAGGGTGAGACAGGCTAGGCATAAAAGTATTACACATTGGGTACAATGTTCACTACTCGGGTGATGGGTACACTAAAAATCTCAGAATTTACTGCTATATAATTTATCCGTGCAACAGAATAAACACTTGCAGTTCAAGAAAATACTGAAATAAAAATT--AAAAAAAGAAAATGTGTGTAAAAGTACCTATTTTCATGTCTGATACCCAGTAAGCATTAAATAAATGTGAGTTCATTTCCTCTTTATTTGTACACAGAGTCATTTCCAAGGGCTTTTGGTTGGATCCTATACATTTCTTAATTTAGAAAATCCCCTAAGAAGTGTAGTTGTAGCAGAGGACTAGAATATCTAGAGCAGTAATTTTTAAAGTGAAAGGGTAGAAAATAAGTGTTACTTGAAAAAACATATTCCTTATTATAACAAATATATTTGGAAAGCAAAATTTAAAATGTCATTATTGTTTCTACAATAAAAACTGTGAAAGTACAGATCTACAAAATCTTCTTAGCTGTCGGGCATTTAGTACTTGGAAAATGTCAATGTGATGGAGCAGATTTTTCTACAAGTCCAGGGTCTGGTTCCTAAGAAGGCAAGTTCACAGTAACCTTGTAGTGAAATGTTTATGTTTCTCAAAGGGAACCTTGGTTTTAAAAGATTGAGAAATGCCGACTGAGTGTCATTGTCACTGTGGAAATCAGATTTCAGAAAGTTTTATCTTTTTTCTTGCATTTTCTCATTTTTTAAAAAGGGAAATTGCTTACAAAGCATTTGTCTGTAGTCTAAAAGTTGAAGCTCTCATGATGACATTACCTGAAAGAAATATAATGCCAATTGGGAAAGGATACTCAGTTCTCTTGGAGATCTGAACTACACTTCCAGAATGTCCTCTCTAGATAGATTTCCCTATTAAGATTCCATTATTCACCACTCCATAACATTTAACTCTTCGT-AGGTATCTAACAGTCTAAATCAAATCATTGGATTACTAGGAAGGAAATTAGAAACCATCTATTCCAAGCCCTCTCCCATTATAATAGACGAGATTATTGAGACCTACAGAAATGAAATAACTCACCAAAGGCCACACCAGTCATTGGCAGAACTTGAACTATAACATAGACTTCTGACTCCTTGTGTATTAATATATCTATTTTATCACTCTACCTGTGATGTATATGAATTGATACTAGGAGAAAACTTTCCCACAAAATATACTGATCTGAAGAATAAATAAACCTTTTTGCCAAAAGCTTTTAAAATAAATCATAGACCCCCAGGAAGCCATTGCCATGACTGTGAGAACTTTTAGAAAGTCTCATTTTACTATAAACAGCTCTGTTCTCTTTGCTTGAGCCAT?????   [4824]
E_patas_R229               TTTCCTTTGCAGGGACATGGATGGAGTTGGAAGTCATTATCCTCAGCAATCTAATGCAGGAATTGAAAACCAAACACCACATGTTCTCACTTATAAATGGGAGCTGAATTATGAGAACACATGGACACATGGTGAGAAACAACAAACATTGGAGTCTGTTGGGGGCTGTTTGGTGAGAGATAGCATCAGGAAGAATAGCTAATGGATGCTGGGCTGAATAATTAGGTGATGGGATGATCTTTTCAGCAAATGACCATGACACACATTTACCTCTGTCACAACCTTGCACATCCTGCACATGTATCCCTAAACTTAAAGTAAAAGTTGAAGAAAAAAAAA-TGTAAAGAAAAACAAAGATCAAAGTATGTCTCTAAAGATATTCCTGATAATAAAAATGGCACAATGTTATGACTAAAACTTCATCATATTCCTTTTTTACCTGGAGCCCAATTCAGAGGTCAATA-----CTTCTGTCTCAATATCGCATCTCAACTCCCATTTTTTCCTTACATCAGGCAACCCTACTCTCACTCCCCTCTTCTTCAAACTCCTACTGAATTTGTAGGCTGCACTGTGAGAAGGTAAGACTACAGAGCATAGGCACATATTAACAGAGCCTTAGGCATTTTTGCTTGTAAAGTCTCTCCCATGAACCACTCTCCCAAACAACAGCCATAATCTTTCTCCTTTCTGCTACTGAAGAAAATGTGGTCAAAGCAAGAATAATAAGGTTTTGGTCCAAGAAATCTGAACACCTAAGAGCTTAAAAGCAGGCAATCCAGCTTTCTATTTGAAATCCAACAGGAATCCCTTAAGCTTAATTAGGAATTTGGTCACTGAAAACTTTATTTTATGGAAATAACTAAATGTTTTCTCACAATACAAATGTGTGGCAGGTCTTTAAATGTGATTCATTGGAGCTGAGTCCAAAACCTTACTAGATACTAGTACCATCTACCCCAAAGCAGCTGCTCTTTCCAACCAACTAGTTCAGCGTTGTGGTTTTCACAAAGTTACAGCCAAAGTGAGCTTATATTATTATGGCATCAGAATTTATATTAGTTTTCTAAGTCCCAGTGAAGAAATTTCCACATCCTGTCAGTAACTAGCTAAGTGCTATTCACATGTTACCTCTAATCTTTGTAAGAATTCTGAGTTAATTATTACTATAATCCTTTACAGATTAGAAAATGGAGTCTCAGCAGGAGTAAGTGACTTTCTGCAAGTCAGAGTTATTATGATTTTAACTGTAATAAGGCTTTTCATAAGCAC-GAAAGTTGAAGTTATTTTTAACTGAATAACTTATTATATGGACAGAAACATATTTTAAAGTGGTATTTCTGTGGATAAGACTGTTCCTCGGAGATAAAAAAAAAAAA------GCTATTGTTTTCGGTTCTAGTTCTAGCAGTTTTATGCATATGCACTACGCATATAAGACAAATTGCCGCCCACAAGGTGTCAGGATAGGGTTATATCAAAACTAACGTTCTTTATGGAGTTGTGCTTATGAATTCAAATTATAACAAATCTGCAGATAGAAGTACTGGAAGAATTTCTTTACAACCGGAATGATCTGAGTAGGACAAGACTTGCTGTAAGATAGAGAAGACTCAAAAGCAGTAGAATTTTTAGAAAAGTGTACTGGATTTGTAGCTAAGATACTTGGATATCGGTAATATTTAAATATTCTTTCTGCTGCTTTGATATGCTCTTTCCCTTCTGTGAGTTTCATTTCCTCATTATTAAAATAATATGATTTAAACTAGATGACCTTTAACTCCCTTCTAGCTCTCATTTGGCATGATTTCATGAGCATTCCCCCTCTGAACCCTGCCCCTAACTAATACCATCACCATTGCGACTGCTGCCACTTATGCAGCTGGTACCAACTCCATAAATCTTCGCTCTCAATCTTCCCCGTCTTTTCACCACTCATCAGTAAGTCACTGGCACCACTAAGTAAACATGTTTATCAAATTTACTTCTCCATTTTATTTGATGCTGAAGCCTGTCTGTGGGCTTGTCATCCTGGGAGGAGAAGAAATAATTAAACAGAAAAAAA-GTTGCTGATGGGGGCCCCTCCCACTCTCTAGAGGACGACTTTTAAATGTCATCTGGGAACTTAACTTGCTTTGCCTCATCTTACATTTTTCTTTTATTTTTAACCACTAAATTTCACATGAATTATCCAAAACAATCTGATCTCCATGACCCTGGTGTTCTTCATTCAGCCGCTTACAACCAGAACCAAAGAGTAGTAGCTAGAATTGGAAACTCTGCTGTTTCCTGAATAAATCTATATCAACTCCAAATAAGCCTGTTTGACATCCAAAACACACAAATTTGGACACATTCTGCAAGTATAGACATTTTCCTCTGTTAGGGGAAGTGAAAATTATTTTTATCCTTAAAATGAATTAAAGCAATTA-GACCACTACCAAGCAACAATTTAAAGTTTGAATCTGAACTTTTACGCATGAATCTGTATTGGATTTTCAATCATTTAGGAAGGTGGCCTAATTAGATATAATTTTTGCAGTTGTTGCAGCATTTTATGGGTGGAAATAATCATGTTCTTTGGGAAGACCTGGTATCATATCATGTCTCAGTTGTTGGCTCTCTGGCCTGAAACAATTCACTTCATATCCCCGGGCTTCAGTTTCCTCTTTTGTAAAATTAGAATAGTTTCTGCCACATAATTTGTTTTAAACATTAAAGAAAAATGTGTGTGAAAATAATAATCTGAGTAAACAGAAAACCCCCAGAATGGGAGAAAATATTTGCAGACTATGCATCTGACAAAGGACTAGAAACTAGAATCTACAAGGAACGCAAACAAGTCAACAATAGAAAAAGAAATATTCTTGTTATAAAGTGCTCAAAGGACATAAATAGAGATTCCTCAAAAGAAGATATACAAATGGCCAACAACCATGAAAAAA-TGCTCGACATCACTAATGATCAGATAAATGCAAATTAAATCCAGAATAAAATAGCACCTTACTGCAAATGGCTATTATTAAAAAGTCAAGAAAAATAGATGCTGTTATGTATGTGGATAAAAGAGAATACTTCTACACTGCTGGTGGGAATATAAATTAATACGATTTCTATAGAAAACAGTATGGAGATTCCTTAAAGAGCTACAAGTAAATCTACCATTTGATACAGCAATCCTACTAATCACAATTGCAAAGATGTGTAATGAATCTATGTGCCAATTGACTAATGAGTGGATAAAGTAAACGTGGTATATATATA--CTATGGAATACTCCTCTGCCATAAAAAGGATCGCAGTAATGTATTTTGCAGTAACTTGGATGGAGCTGGAGTCCACTATTCTAAGTAAAATAACACAGGAGTGAAAAATAATAATA---CAAAAAGATGTTCCCAATTATAAGTGACAGATAAGCTACGATTATGCAAAGGTATACAGAGTGATATAATGGAATCTAGAGACTCAGAAGGGGGAGGGTGAGACAGGCTAGGCATAAAAGTATTACACATTGGGTACAATGTTCACTACTCAGGTGATGGGTACACTAAAAATCTCAGAATTTACTGCTATGTAATTTATCCGTGCAACAGAATAAACACTTGCAGTTCAAGAAAATACTGAAATAAAAATT--AAAAAAAGAAAATGTGTGTAAAAGTACCTATTTTCATGTCTGATACCCAGTAAGCATTAAATAAATGTGAGTTCATTTCCTCTTTATTTGTACACAGAGTCATCTCCAAGGGCCTTTGGTTGGATCCTACACATTTCTTAATTTAGAAAATCCCCTAAGAAGTGTAGTTGTAGCAGAGGACTAGAATATCTAGAGCAGTAATTTTTAAAGTGAAAGGGTAGAAAATAAGTGTTACTTGAAAAAACATATTCCTTATTATAACAAATATATTTGGAAAACAAAATAAAAAATGTCATTATTGTTTCTACAATAAAAACTGTGAAAGTACAGATCTACAAAATCTTCTTAGCTGTTGGGCATTTAGTACTTGGAAAATGTCAATGTGATGGAGCAGATTTTTCTACAAGTCCAGGGTCTGGTTCCTAGGAAGGCAAGTTCACAGTAACCTTGTAGTGAAATGTTTATGTTTCTCATTGGGAACCTTGGTTTTAAAAGATTGAGAAATGCCAACTGAGTGTCATTGTCACTGTGGAAATCAGATTTCAGAAAGTTTTATCTTTTTTCTTGCATTTTCTCATTTTTTGAAAAGGGAAATTGCTTACAAAGCACTTGTCTGTGGTCTAAAAGTTGAAGCTCTCATGATGACATTACCTGAAAGAAATATAATGCCAATTGGGAAAGGATACTCAGTTCTCTTGGAGATCTGAACTACACTTCCAGAATGTCCTCTCTAAATAGATTTCCCTATTAAGATTCCATTATTCACCACTCCATAATATTTAACTCTTCGT-AGGTATCTAACAGTCTAAATCAAATCATTGGATTACTAGGAAGGAAATTAGAAACCATCTATTCCAAGCCCTCTCCCATTATAATAGACAAGATTATTGAGACCCACAGAAATGAAATAACTCACCAAAGGCCACACCAGTCATTGGCAGAACTTGAACTATAACATAGACTTCTGACTCCTTGTGTATTGATATATCTATTTTATCACTCTACCTGTGATGTATATGAATTGATACTAGGAGAAAACTTCCCCACAAAATATACTGATCTGAAGAATAAATAAACCTTTTTGCCAAAAGCTTTTAAAATAAATCATAGACCCCCAGGAAGCGATTGCCATGACTGTGAGAATTTTTAGAAAGTCTCATTTTACTATAAACAGCTCTGTTCTCTTTGCTTGAGCCATTACAG   [4829]
C_aethiops_90017           TTTCCTTTGCAGGGACATGGATGGAGTTGGAAGTCATTATCCTCAGCAATCTAATGCAGGAATTGAAAACCAAACACCACATGTTCTCACTTATAAATGGGAGCTGAATTATGAGAACACATGGACACATGGTGAGAAACAACAAACATTGGAGTCTGTTGGGGGCTGTTTGGCGAGAGATAGCATCAGGAAGAATAGCTAATGGATGCTGGGCTGAATAATTAGGTGATGGGATGATCTTTTCAGCAAATGACCATGACACATATTTACCTCTGTCACAACCTTGCACATCCTGCACATGTATCCCTAAACTTAAAGTAAAAGTTGAAGAAAAAAAAAATGTAAAGAAAAACAAAGATCAAAGTATGTCTCTAAAGATATTCCTGATAATAAAAATGGCACAATGTTGTGACTAAAACTTCATCATATTCCTTTTTTACCTGGAGCCCAACTCAGAGGTCAATA-----CTTCTGTCTCAATATCGCATCTCAACTCCCATTTTTTCCTTACATCAGGCAACCCTACTCTCACTCCCCTCTTCTTCAAACTCCTACTGAATTTGTAGGCTGCACTGTGAGAAGGTAAGACTACAGAGCATAGGCACATATTAACAGCGCCTTAGGCATTTTTGCTTGTAAAGTCTCTCCCATGAACCACTCTCCCAAACAACAGCCATAATCTTTCTCCTTTCTGCTACTGAAGAAAATGTGGTCAAAGCAAGAATAATAAGGTTTTGGTCTAAGAAATCTGAACACCTAAGAGCTTAAAAGCAGGCAATCCAGCTTTCTATTTGAAATCCAACAGGAATCCCTTAAGCTTAATTAGGAATTTGGTCACTGAAAACTTTATTTTATGGAAATAACTAAATGTTTTCTCACAATACAAATGTGTGGCAGGTCTTTAAATGTGATTCATTGGAGCTGAGTCCAAAACCTTACTAGATACTAGTACCATCTACCCCAAAGCAGCTGCTCTTTCCAACCAACTAGTTCAGCGTTGTGGTTTTCACAAAGTTACAGCCAAAGTGAGCTTATATTATTATGGCATCAGAATTTATATTAGTTTTCTAAGTCCCAGTGAAGAAATTTCCACATCCTGTCAGTAACTAGCTAAGTGCTATTCACATGTTACCTCTAATCTTTGTAAGAATTCTGAGTTAATTATTACTATAATCCTTTACAGATTAGAAAATGGAGTCTCAGCAGGAGTAAGTGACTTTCTGCAAGTCAGAGTTATTATGATTTTAACTGTAATAAGGCTTTTCATAAGCAC-AAAAGTTGAAGTTATTTTTAACTGAATAACTTATTATATGGACAGAAACATATTTTAAAGTGGTATTTCTGTGGATAAGACTGTTCCTCGGAGATAAAAAAAAAA--------GCTATTGTTTTCGTTTCTAGTTCTAGCAGTTTTATGCATACGCACTACGCATATAAGGCAAATTGCCGCCCACAAGGTGTCAGGATAGGGTTATATCAAAACTAACGTTCTTTATGGAGTTGTGCTTATGAATTCAAATTATAACAAATCTGCAGATAGAAGTACTGGAAGAATTTCTTTACAACCGGAATGATCTGAGTAGCACAAGACTTGCTGTAAGATAGAGAAGACTCAAAAGCAGTAGAATTTTTAGAAAAGTGTACTGGATTTGTAGCTAAGATACTTGGATATCGGTAATATTTAAATATTCTTTCTGCTGCTTTGATATGCTCTTTCCCTTCTGTGAGTTTCATTTCCTCATTATTAAAATAATATGATTTAAACTAGATGACCTTTAACTCCCTTCT----CTCATTTGGCATGATTTCATGAGCATTCCCCCTCTGAACCCTGCCCCTAACTAATACCATCACCATTGCGACTGCTGCCACTTATGCAGCTGGTACCAACTCCATAAATCTTCGCTCTCAATCTTCCCCGTCTTTTCACCACTCATCAGTAAGTCACTGGCACCACTAAGTAAACATGTTTATCAAATTTACTTCTCCATTTTATTTGATGCTGAAGCCTGTCTGTGGGCTTGTCATCCTGGGAGGAGAAGAAATAATTAAACAGAAAAAAA-GTTGCTGATGGGGGCCCCTCCCACTCTCTAGAGGACAACTTTTAAATGTCATCTGGGAACTTAACTTGCTTTGCCTCATCTTACATTTTTCTTTTATTTTTAACCACTAAATTTCACATGAATTATCCAAAACAATCTGATCTCCATGACCCTGGTGTTCTTCATTCAGCCGCTTACAACCAGAACCAAAGAGTAGTAGCTAGAATTGGAAACTCTGCTGTTTCCTGAATAAATCTATATCAACTCCAAATAAGCCTGTTTGACATCCAAAACACACAAATTTGGACACATTCTGCAAGTATAGACATTTTCCTCTGTTAGGGGAAGTGAAAATTATTTTTATCCTTAAAATGAATTAAAGCAATTA-GACCACTACCAAGCAACAACTTAAAGTTTGAATCTGAACTTTTACGCATGAATCTGTATTGGATTTTCAATCATTTAGGAAGGTGGCCTAATTAGATATAATTTTTGCAGTTGTTGCAGCATTTTATGGGTGGAAATAATCATGTTCTTTGGGAAGACCTGGTATCATATCATGTCTCAGTTGTTGGCTCTCTGGCCTGAAACAATTCACTTCATATCCCCGGGCTTCAGTTTCCTCTTTTGTAAAATTAGAATAGTTTCTGCCACATAATTTGTTTTAAACATTAAAGAAAAATGTGTGTGAAAATAATAATCTGAGTAAACAGAAAACCCCCAGAATGGGAGAAAATATTTGCAGACTATGCATCTGACAAAGCACTAGAAACTAGAATCTACAAGGAACGCAAACAAGTCAACAATAGAAAAAGAAATATTCTCGTTATAAAGTGCTCAAAGGACATAAATAGAGATTCCTCAAAAGAAGATATACAAATGGCCAACAACCATGAAAAAA-TGCTCGACATCACTAATGATCAGATAAATGCAAATTAAATCCAGAATAAAATAGCACCTTACTGCAAATGGCTATTATTAAAAAGTCAAGAAAAATAGATGCTGGTATGTATGTGGATAAAAGAGAATACTTCTACACTGCTGGTGGGAATGTAAATTAATACAATTTCTATAGAAAACAGTATGGAGATTCCTTAAAGAGCTACAAGTAAATCTACCATTTGATACAGCAATCCTACTAATCACAATTGCAAAGATGTGTAATGAATCTATGTGCCAATTGACTAATGAGTGGATAAAGTAAACGTGGTATATATATA--CTATGGAATACTCCTCTGCCATAAAAAGGATTGTAGTAATGTATTTTGCAGTAACTTGGATGGAGCTGGAGTCCACTATTCTAAGTAAAATAACACAGGAGTGAAAAATAATAATA---CAAAAAGATGTTCCCAATTATAAGTGACAGATAAGCTACGATTATGCAAAGGTATACAGAGTGATATAATGGAATCTAGAGACTCAGAAGGGGGAGGGTGAGACAGGCTAGGCATAAAAGTATTACACATTGGGTACAATGTTCACTACTCAGGTGATGGGTACACTAAAAATCTCAGAATTTACTGCTATATAATTTATCCATGCAACAGAATAAACACTTGCAGTTCAAGAAAATACTGAAATAAAAATTTAAAAAAAAGAAAATGTGTGTAAAAGTACCTATTTTCATGTCTGATACCCAGTAAGCATTAAATAAATGTGAGTTCATTTCCTCTTTATTTGTACACAGAGTCATCTCCAAGGGCCTTTGGTTGGATCCTATACATTTCTTAATTTAGAAAATCCCCTAAGAAGTGTAGTTGTAGCAGAGGACTAGAATATCTAGAGCAGTAATTTTTAAAGTGAAAGGGTAGAAAATAAGTGTTACTTGAAAAAACATATTCCTTATTATAACAAATACATTTGGAAAACAAAATAAAAAATGTCATTATTGTTTCTACAATAAAAACTGTGAAAGTACAGATCTACAAAATCTTCTTAGCTGTTGGGCATTTAGTACTTGGAAAATGTCAATGTGATGGAGCAGATTTTTCTACAAGTCCAGGGTCTGGTTCCTAGGAAGGCAAGTTCACAGTAACCTTGTAGTGAAATGTTTATGTTTCTCATTGGGAACCTTGGTTTTAAAAGATTGAGAAATGCCAACTGAGTGACATTATCACTGTGGAAATCAGATTTCAGAAAGTTTTATCTTTTTTCTTGCATTTTCTCATTTTTTGAAAAGGGAAATTGCTTACAAAGCATTTGTCTGTGGTCTAAAAGTTGAAGCTCTCATGATGACATTACCTGAAAGAAATATAATGCCAATTGGGAAAGGATACTCAGTTCTCTTGGAGATCTGAACTACACTTCCAGAATGTCCTCTCTAGATAGATTTCCCTATTAAGATTCCATTATTCACCACTCCATAATATTTAACTCTTCGT-AGGTATCTAACAGTCTAAATCAAATCATTGGATTACTAGGAAGGAAATTAGAAACCATCTATTCCAAGCCCTCTCCCATTATAATAGACAAGATTATTGAGACCCACAGAAATGAAATAACTCACCAAAGGCCACACCAGTCATTGGCAGAACTTGAACTATAACATAGACTTCTAACTCCTTGTGTATTGATATATCTATTTTATCACTCTACCTGTGATGTATATGAATTGATACTAGGGGAAAACTTCCCCACAAAATATACTGATCTGAAGAATAAATAAACCTTTTTGCCAAAAGCTTTTAAAATAAATCATAGACCCCCAGGAAGCGATTGCCATGACTGTGAGAACTTTTAGAAAGTCTCATTTTACTATAAACAGCTCTGTTCTCTTTGCTTGAGCCATTACAG   [4826]
C_lhoesti_Antwerp          TTTCCTTTGCAGGGACATGGATGGAGTTGGAAGTCATTATCCTCAGCAATCTAATGCAGGAATTGAAAACCAAACACCACATGTTCTCACTTATAAATGGGAGCTGAATTATGAGAACACATGGACACATGGTGAGAAACAACAAACATTGGAGTCTGTTGGGGGCTGTTTGGTGAGAGATAGCATCAGGAAGAATAGCTAATGGATGCTGGGCTGAATAATTAGGTGATGGGATGATCTTTTCAGCAAATGACCATGACACACATTTACCTCTGTCACAACCTTGCACATCCTGCACATGTATCCCTAAACTTAAAGTAAAAGTTGAAGAAAAAAAAA-TGTAAAGAAAAACAAAGATCAAAGTATGTCTCTAAAGATATTCCTGATAATAAAAATGGCACAATGTTATGACTAAAACTTCATCATATTCCTTTTTTACCTGGAGCCCAATTCAGAGGTCAATA-----CTTCTGTCTCAATATCGCATCTCAACTCCCATTTTTTCCTTACATCAGGCAACCCTACTCTCACTCCCCTCTTCTTCAAACTCCTACTGAATTTGTAGGCTGCACTGTGAGAAGGTAAGACTACAGAGCATAGGCACATATTAACAGAGCCTTAGGCATTTTTGCTTGTAAAGTCTCTCCCATGAACCACTCTCCCAAACAACAGCCATAATCTTTCTCCTTTCTGCTACTGAAGAAAATGTGGTCAAAGCAAGAATAATAAGGTTTTGGTCTAAGAAATCTGAACACCTAAGAGCTTAAAAGCAGGCAATCCAGCTTTCTATTTGAAATCCAACAGGAATCCCTTAAGCTTAATTAGGAATTTGGTCACTGAAAACTTTATTTTATGGAAATAACTAAATGTTTTCTCACAATACAAATGTGTGGCAGGTCTTTAAATGTGATTCATTGGAGCTGAGTCCAAAACCTTACTAGATACTAGTACCATCTACCCCAAAGCAGCTGCTCTTTCCAACCAACTAGTTCAGCGTTGTGGTTTTCACAAAGTTACAGCCAAAGTGAGCTTATATTATTATGGCATCAGAATTTATATTAGTTTTCTAAGTCCCAGTGAAGAAATTTCCACATCCTGTCAGTAACTAGCTAAGTGCTATTCACATGTTACCTCTAATCTTTGTAAGAATTCTGAGTTAATTATTACTATAATCCTTTACAGATTAGAAAATGGAGTCTCAGCAGGAGTAAGTGACTTTCTGCAAGTCAGAGTTATTATGATTTTAACTGCAATAAGGCTTTTCATAAGCAC-GAAAGTTGAAGTTATTTTTAACTGAATAACTTATTATATGGACAGAAACATATTTTAAAGTGGTATTTCTGTGGATAAGACTGTTCCTCGGAGATTAAAAAAAAAA-------GCTATTGTTTTCAGTTCTAGTTCTAGCAGTTTTATGCATGCGCACTACGCATATAAGGCAAATTGCCGCCCACAAGGTGTCAGGATAGGGTTATATCAAAACTAACGTTCTTTATGGAGTTGTGCTTATGAATTCAAATTATAACAAATCTGCAGATAGAAGTACTGGAAGAATTTCTTTACAACCGGAATGATCTGAGTGGGACAAGACTTGCTGTAACATAGAGAAGACTCAAAAGCAGTAGAATTTTTAGAAAAGTGTACTGAATTTGTAGCTAAGATACTTGGATATCGGTAATATTTAAATATTCTTTCTGCTGCTCTGATATGCTCTTTCCCTTCTGTGAGTTTCATTTCCTCATTATTAAAATAATATGATTTAAACTAGATGACCTTTAACTCCCTTCTAGCTCTCATTTGGCATGATTTCATGAGCATTCCCCCTCTGAACCCTGCCCCTAACTAATACCATCACCATTGCGACTGCTGCCACTTATGCAGCTGGTACCAACTCCATAAATCTTCACTCTCAATCTTCCCCGTCTTTTCACCACTCATCAGTAAGTCACTGGCACCACTAAGTAAACATGTTTATCAAATTTACTTCTCCATTTTATTTGATGCTGAAGCCTGTCTGTGGGCTTGTCATCCTGGGAGGAGAAGAAATAATTAAACAGAAAAAAA-GTTGCTGATGGGGGCCCCTCCCACTCTCCAGAGGACAACTTTTAAATGTCATCTGGGAACTTAACTTGCTTTGCCTCATCTTACATTTTTCTTTTGTTTTTAACCACTAAATTTCACATGAATTATCCAAAACAATCTGATCTCCATGACCCTGGTGTTCTTCATTCAGCCGCTTACAACCAGAACCAAAGAGTAGCAGCTAGAATTGGAAACTCTGCTGTTTCCTGAATAAATCTATATCAACTCCAAATAAGCCTGTTTGACATCCAAAACACACAAATTTGGACACATTCTGCAAGTATAGACATTTTCCTCTGTTAGGGGAAGTGAAAATTATTTTTATCCTTAAAATGAATTAAAGCAATTA-GACCACTACCAAGCAACAACTTAAAGTTTGAATCTGAACTTTTACGCATGAATCTGTATTGGATTTTTAATCATTTAGGAAGGTGGCCTAATTAGATATAATTTTTGCAGTTGTTGCAGCATTTTATGGGTGAAAATAATCATGTTCTTTGGGAAGACCTGGTATCATATCATGTCTCAGTTGTTGGCTCTCTGGCCTGAAACAATTCACTTCATATCCCCGGGCTTCAGTTTCCTCTTTTGTAAAATTAGAATAGTTTCTGCCACATAATTTGTTTTAAACATTAAAGAAAAATGTGTGTGAAAATAATAATCTGAGTAAACAGAAAACCCCCAGAATGGGAGAAAATATTTGCAGACTATGCGTCTGACAAAGGACTAGAAACTAGAATCTACAAAGAACGCAAACAAGTCAACAATAGAAAAAGAAATATTCTCGTTATAAAGTGCTCAAAGGACATAAATAGACATTCCTCAAAAGAAGATATACAAATGGCCAACAACCATGAAAAAA-TGCTCGACATCACTAATGATCAGATAAATGCAAATTAAATCCAGAATAAAATAGCACCTTACTGCAAATGGCTATTATTAAAAAGTCAAGAAAAATAGATGCTGGTATGTATGTGGATAAAAGAGAATACTTCTACACTGCTGGTGGGAATGTAAATTAATACAATTTCTATAGAAAACAGTATGGAGATTCCTTAAAGAGCTACAAGTAAATCTACCATTTGATACAGCAATCCTACTAATCACAATTGCAAAGATGTGTAATGAATCTATGTGCCAATTGACTAATGAGTGGATAAAGTAAACGTGGTATATATATA--CTATGGAATATTCCTCTGCCATAAAAAGGATCGCAGTAATGTATTTTGCAGTAACTTGGATGGAGCTGGAGTCCACTATTCTAAGTAAAATAACACAGGAGTGAAAAATAATAATA---CAAAAAGATGTTCCCAATTATAAGTGACAGATAAGCTACGATTATGCAAAGGTATACAGAGTGATATAATGGAATCTAGAGACTCAGAAGGGGGAGGGTGAGACAGGCTAGGCATAAAAGTATTACACATTGGGTACAATGTTCACTACTCAGGTGATGGGTACACTAAAAATCTCAGAATTTACTGCTATATAATTTATCCGTGCAACAGAATAAACACTTGCAGTTCAAGAAAATACTGAAATAAAAATT--AAAAAAAGAAAATGTGTGTAAAAGTACCTATTTTCATGTCTGATACCCAGTAAGCATTAAATAAATGTGAGTTCATTTCCTCTTTATTTGTACACAGAGTCATCTCCAAGGGCCTTTGGTTGGATCCTATACATTTCTTAATTTAGAAAATCCCCTAAGAAGTGTAGTTGTAGCAGAGGACTAGAATATCTAGAGCAGTAATTTTTAAAGTGAAAGGGTAGAAAATAAGTGTTATTTGAAAAAACATATTCCTTATTATAACAAATATATTTGGAAAACAAAATAAAAAATGTCATTATTGTTTCTACAATAAAAACTGTGAAAGTACAGATCTACAAAATCTTCTTAGCTGTTGGGCATTTAGTACTTGGAAAATGTCAATGTGATGGAGCAGATTTTTCTACAAGTCCAGGGTCTGGTTCCTAGGAAGGCAAGTTCACAGTAACCTTGTAGTGAAATGTTTATGTTTCTCATTGGGAACCTTGGTTTTAAAAGATTGAGAAATGCCAACTGAGTGTCATTGTCACGGTGGAAATCAGATTTCAGAAAGTTTTATCTTTTTTCTTGCATTTTCTCATTTTTTGAAAAGGGAAATTGCTTACAAAGCATTTGTCTGTGGTCTAAAAGTTGAAGCTCTCATGATGATATTACCTGAAAGAAACATAATGCCAATTGGGAAAAGATACTCAGTTCTCTTGGAGATCTGAACTACACTTCCAGAATGTCCTCTCTAGATAGATTTCCCTGTTAAGATTCCATTATTCACCAGTCCATAATATTTAACTCTTCGT-AGGTATCTAACAGTCTAAATCAAATCATTGCATTACTAGGAAGGAAATTAGAAACCATCTATTCCAAGTCCTCTCCCATTATAATAGACAAGATTATTGAGACCCACAGAAGTGAAATAACTCACCAAAGGCCACACCAGTCATTGGCAGAACTTGAACTATAATATAGACTTCTGACTCCTTGTGTATTGATATATCTATTTTATCACTCTACCTGTGATGTATATGAATTGATACTAGGAGAAAACTTCCCCACAAAATATACTGATCTGAAGAATAAATAAACCTTTTTGCCAAAAGCTTTTAAAATAAATCATAGACCCCCAGGAAGCGATTGCCATGACTGTGAGAACTTTTAGAAAGTCTCATTTTACTATAAACAGCTCTGTTCTCTTTGCTTGAGCCATTACAG   [4828]
C_solatus_Ombue            TTTCCTTTGCAGGGACATGGATGGAGTTGGAAGTCATTATCCTCAGCAATCTAATGCAGGAATTGAAAACCAAACACCACATGTTCTCACTTATAAATGGGAGCTGAATTATGAGAACACATGGACACATGGTGAGAAACAACAAACATTGGAGTCTGTTGGGGGCTGTTTGGTGAGAGATAGCATCAGGAAGAATAGCTAATGGATGCTGGGCTGAATAATTAGGTGATGGGATGATCTTTTCAGCAAATGACCATGACACACATTTACCTCTGTCACAACCTTGCACATCCTGCACATGTATCCCTAAACTTAAAGTAAAAGTTGAAGAAAAAAAAA-TGTAAAGAAAAACAAAGATCAAAGTATGTCTCTAAAGATATTCCTGATAATAAAAATGGCACAATGTTATGACTAAAACTTCATCATATTCCTTTTTTACCTGGAGCCCAATTCAGAGGTCAATA-----CTTCTGTCTCAATATCGCATCTCAACTCCCATTTTTTCCTTACATCAGGCAACCCTACTCTCACTCCCCTCTTCTTCAAACTCCTACTGAATTTGTAGGCTGCACTGTGAGAAGGTAAGACTACAGAGCATAGGCACATATTAACAGAGCCTTAGGCATTTTTGCTTGTAAAGTCTCTCCCATGAACCACTCTCCCAAACAACAGCCATAATCTTTCTCCTTTCTGCTACTGAAGAAAATGTGGTCAAAGCAAGAATAATAAGGTTTTGGTCTAAGAAATCTGAACACCTAAGAGCTTAAAAGCAGGCAATCCAGCTTTCTATTTGAAATCCAACAGGAATCCCTTAAGCTTAATTAGGAATTTGGTCACTGAAAACTTTATTTTATGGAAATAACTAAATGTTTTCTCACAATACAAATGTGTGGCAGGTCTTTAAATGTGATTCATTGGAGCTGAGTCCAAAACCTTACTAGATACTAATACCATCTACCCCAAAGCAGCTGCTCTTTCCAACCAACTAGTTCAGCGTTGTGGTTTTCACAAAGTTACAGCCAAAGTGAGCTTATATTATTATGGCATCAGAATTTATATTAGTTTTCTAAGTCCCAGTGAAGAAATTTCCACATCCTGTCAGTAACTAGCTAAGTGCTATTCACATGTTACCTCTAATCTTTGTAAGAATTCTGAGTTAATTATTACTATAATCCTTTACAGATTAGAAAATGGAGTCTCAGCAGGAGTAAGTGACTTTCTGCAAGTCAGAGTTATTATGATTTTAACTGTAATAAGGCTTTTCATAAGCAC-GAAAGTTGAAGTTATTTTTAACTGAATAACTTATTATATGGACAGAAACATATTTTAAAGTGGTATTTCTGTGGATAAGACTGTTCCTCGGAGATAAAAAAAAAAA-------GCTATTGTTTTCAGTTCTAGTTCTAGCAGTTTTATGCATGCGCACTACGCATATAAGGCAAATTGCCGCCCACAAGGTGTCAGGATAGGGTTATATCAAAACTAACGTTCTTTATGGAGTTGTGCTTATGAATTCAAATTATAACAAATCTGCAGATAGAAGTACTGGAAGAATTTCTTTACAACCGGAATGATCTGAGTGGGACAAGACTTGCTGTAACATAGAGAAGACTCAAAAGCAGTAGAATTTTTAGAAAAGTGTACTGAATTTGTAGCTAAGATACTTGGATATCGGTAATATTTAAATATTCTTTCTGCTGCTCTGATATGCTCTTTCCCTTCTGTGAGTTTCATTTCCTCATTATTAAAATAATATGATTTAAACTAGATGACCTTTAACTCCCTTCTAGCTCTCATTTGGCATGATTTCATGAGCATTCCCCCTCTGAACCCTGCCCCTAACTAATACCATCACCATTGCGACTGCTGCTACTTATGCAGCTGGTACCAACTCCATAAATCTTCACTCTCAATCTTCCCCGTCTTTTCACCACTCATCAGTAAGTCACTGGCACCACTAAGTAAACATGTTTATCAAATTTACTTCTCCATTTTATTTGATGCTGAAGCCTGTCTGTGGGCTTGTCATCCTGGGAGGAGAAGAAATAATTAAACAGAAAAAAA-GTTGCTGATGGGGGCCCCTCCCACTCTCTAGAGGACAACTTTTAAATGTCATCTGGGAACTTAACTTGCTTTGCCTCATCTTACATTTTTCTTTTATTTTTAACCACTAAATTTCACATGAATTATCCAAAACAATCTGATCTCCATGACCCTGGTGTTCTTCATTCAGCCGCTTACAACCAGAACCAAAGAGTAGCAGCTAGAATTGGAAACTCTGCTGTTTCCTGAATAAATCTATATCAACTCCAAATAAGCCTGTTTGACATCCAAAACACACAAATTTGGACACATTCTGCAAGTATAGACATTTTCCTCTGTTAGGGGAAGTGAAAATTATTTTTATCCTTAAAATGAATTAAAGCAATTA-GACCACTACCAAGCAACAACTTAAAGTTTGAATCTGAACTTTTACGCATGAATCTGTATTGGATTTTTAATCATTTAGGAAGGTGGCCTAATTAGATATAATTTTTGCAGTTGTTGCAGCATTTTATGGGTGAAAATAATCATGTTCTTTGGGAAGACCTGGTATCATATCATGTCTCAGTTGTTGGCTCTCTGGCCTGAAACAATTCACTTCATATCCCCGGGCTTCAGTTTCCTCTTTTGTAAAATTAGAATAGTTTCTGCCACATAATTTGTTTTAAACATTAAAGAAAAATGTGTGTGAAAATAATAATCTGAGTAAACAGAAAACCCCCAGAATGGGAGAAAATATTTGCAGACTATGCGTCTGACAAAGGACTAGAAACTAGAATCTACAAGGAACGCAAACAAGTCAACAATAGAAAAAGAAATATTCTCGTTATAAAGTGCTCAAAGGACATAAATAGACATTCCTCAAAAGAAGATATACAAATGGCCAACAACCATGAAAAAA-TGCTCGACATCACTAATGATCAGATAAATGCAAATTAAATCCAGAATAAAATAGCACCTTACTGCAAATGGCTATTATTAAAAAGTCAAGAAAAATAGATGCTGGTATGTATGTGGATAAAAGAGAATACTTCTACACTGCTGGTGGGAATGTAAATTAATACAATTTCTATAGAAAACAGTATGGAGATTCCTTAAAGAGCTACAAGTAAATCTACCATTTGATACAGCAATCCTACTAATCACAATTGCAAAGATGTGTAATGAATCTATGTGCCAATTGACTAATGAGTGGATAAAGTAAACGTGGTATATATATA--CTATGGAATACTCCTCTGCCATAAAAAGGATCGCAGTAATGTATTTTGCAGTAACTTGGATGGAGCTGGAGTCCACTATTCTAAGTAAAATAACACAGGAGTGAAAAATAATAATA---CAAAAAGATGTTCCCAATTATAAGTGACAGATAAGCTACGATTATGCAGAGGTATACAGAGTGATATAATGGAATCTAGAGACTCAGAAGGGGGAGGGTGAGACAGGCTAGGCATAAAAGTATTACACATTGGGTACAATGTTCACTACTCAGGTGATGGGTACACTAAAAATCTCAGAATTTACTGCTATATAATTTATCCGTGCAACAGAATAAACACTTGCAGTTCAAGAAAATACTGAAATAAAAATT--AAAAAAAGAAAATGTGTGTAAAAGTACCTATTTTCATGTCTGATACCCAGTAAGCATTAAATAAATGTGAGTTCATTTCCTCTTTATTTGTACACAGAGTCATCTCCAAGGGCCTTTGGTTGGATCCTATACATGTCTTAATTTAGAAAATCCCCTAAGAAGTGTAGTTGTAGCAGAGGACTAGAATATCTAGAGCAGTAATTTTTAAAGTGAAAGGGTAGAAAATAAGTGTTATTTGAAAAAACATATTCCTTATTATAACAAATATATTTGGAAAACAAAATAAAAAATGTCATTATTGTTTCTACAATAAAAACTGTGAAAGTACAGATCTACAAAATCTTCTTAGCTGTTGGGCATTTAGTACTTGGAAAATGTCAATGTGATGGAGCAGATTTTTCTACAAGTCCAGGGTCTGGTTCCTAGGAAGGCAAGTTCACAGTAACCTTGTAGTGAAATGTTTATGTTTCTCATTGGGAACCTTGGTTTTAAAAGATTGAGAAATGCCAACTGAGTGTCATTGTCACTGTGGAAATCAGATTTCAGAAAGTTTTATCTTTTTTCTTGCATTTTCTCATTTTTTGAAAAGGGAAATTGCTTACAAAGCATTTGTCTGTGGTCTAAAAGTTGAAGCTCTCATGATGACATTACCTGAAAGAAACATAATGCCAATTGGGAAAAGATACTCAGTTCTCTTGGAGATCTGAACTACACTTCCAGAATGTCCTCTCTAGATAGATTTCCCTGTTAAGATTCCATTATTCACCAGTCCATAATATTTAACTCTTCGT-AGGTATCTAACAGTCTGAATCAAATCATTGCATTACTAGGAAGGAAATTAGAAACCATCTATTCCAAGTCCTCTCCCATTATAATAGACAAGATTATTGAGACCCACAGAAGTGAAATAACTCACCAAAGGCCACACCAGTCATTGGCAGAACTTGAACTATAATATAGACTTCTGACTCCTTGTGTATTGATATATCTATTTTATCACTCTACCTGTGATGTATATGAATTGATACTAGGAGAAAACTTCCCCACAAAATATACTGATCTGAAGAATAAATAAACCTTTTTGCCAAAAGCTTTTAAAATAAATCATAGACCCCCAGGAAGCGATTGCCATGACTGTGAGAACTTTTAGAAAGTCTCATTTTACTATAAACAGCTCTGTTCTCTTTGCTTGAGCCATTACAG   [4828]
C_mitis_C_Lehn             TTTCCTTTACAGGGACATGGATGGAGTTGGAAGTCATTATCCTCAGCAATCTAATGCAGGAATTGAAAACCAAACACCACATGTTCTCACTTATAAATGGGAGCTGAATTATGAGAACACATGGACACATGGTGAGAAACAACAAACATTGGAGTCTGTTGGGGGCTGTTTGGTGAGAGAGAGCATCAGGAAGAATAGCTAATGGATGCTGGGCTGAATAATTAGGTGATGGGATGATCTTTTCAGCAAATGACCATGACACACATTTACCTCTGTCACAACCTTGCACATCCTGCACATGTATCCCTAAACTTAAAGTAAAAGTTGAAGAAAAAAAAA-TGGAAAGAAAAACAAAGATCAAAGTATGTCTCTAAAGATATTCCTGATAATAAAAATGGCACAATGTTATGACTAAAACTTCATCATATTCCTTTTTTACCTGGAGCCCAATTCAGAGGTCAATA-----CTTCTGTCTCAATATCGCATCTCAACTCCCATTTTTTCCTTACATCAGGCAACCCTACTCTCACTCCCCTCTTCTTCAAACTCCTACTGAATTTGTAGGCTGCACTGTGAGAAGGTAAGACTACAGAGCATAGGCACATATTAACAGAGCCTTAGGCATTTTTGCTTGTAAAGTCTCTCCCATGAACCACTCTCCCAAACAACAGCCATAATCTTTCTCCTTTCTGCTACTGAAGAAAATGTGGTCAAAGCAAGAATAATAAGGTTTTGGTCTAAGAAATCTGAACACCTAAGAGCTTAAAAGCAGGCAATCCAGCTTTCTATTTGAAATCCAACAGGAATCCCTTAAGTTTAATTAGGAATTTGGTCACTGAAAACTTTATTTTATGGAAATAACTAAATGTTTTCTCACAATACAAATGTGTGGCAGGTCTTTAAATGTGATTCATTGGAGCTGAGTCCAAAACCTTACTAGATACTAGTACCATCTACCCCAAAGTAGCTGCTCTTTCCAACCAACTAGCTCAGCGTTGTGGTTTTCACAAAGTTACAGCCAAAGTGAGCTTATATTATTATGGCATCAGAATTTATATTAGTTTTCTAAGTCCCAGTGAAGAAATTTCCACATCCTGTCAGTAACTAGCTAAGTGCTATTCACATGTTACCTCTAATCTTTGTAAGAATTCTGAGTTAATTATTACTATAATCTTTTACAGATTAGAAAATGGAGTCTCAGCAGGAGTAAGTGACTTTCTGCAAGTCAGAGTTATTATGATTTTAACTGTAATAAGGCTTTTCATAAGCAC-GAAAGTTGAAGTTATTTTTAACTGAATAACTTATTATATGGACAGAAACATATTTTAAAGTGGTATTTCTGTGGATAAGACTGTTCCTCGGAGATAAAAAAAAAA--------GCTATTGTTTTCGGTTCTAGTTCTAGCAGTTTTATGCATACGCACTACGCATATAAGGCAAATTGCCGCCCACAAGGTGTCAGGATAGGGTTATATCAAAACTAACGTTCTTTATGGAGTTGTGCTTATGAATTCAAATTATAACAAATCTGCAGATAGAAGTACTGGAAGAATTTCTTTACAACAGGAATGAACTGAGCAGGACAAGACTTGCTGTAAGATAGAGAAGACTCAAAAGCAGTAGAATTTTTAGAAAAGTGTACTGGATTTGTAGCTAAGATACTTGGATATTGGTAATATTTAAATATTATTTGTGCTGCTCTGATATGCTCTTTCCCTTCTGTGAGTTTCATTTCCTCATTATTAAAATAATATGATTTAAACTAGATGACCTTTAACTCCCTTCTAGCTCTCATTTGGCATGATTTCATGAGCATTCCCCCTCTGAATCCTGCCCCTAACTAATACCATCACCATTGCGACTGCTGCCACTTATGCAGCTGGTACCAACTCCATAAATCTTCGCTCTCAATCTTCCCCGTCTTTTCACCACTCATCAGTAAGTCACTGGCACCACTAAGTAAACATGTTTATCAAATTTACTTCTCCATTTTATTTGATGCTGAAGCCTGTCTGTGGGTTTGTCATCCTGGGAGGAGAAGAAATAATTAAACAGAAAAAAA-GTTGCTGATGGGGGCCCCTCCCACTCTCTAGAGGACAACTTTTAAATGTCGTCTGGGAACTGAACTTGCTTTGCCTCATCTTACATTTTTCTTTTATTTTTAACCACTAAATTTCACATGAATTATCCAAAACAATCTGATCTCCATGACCCTGGTGTTCTTCATTCAGCCGCTTACAACCAGAACCAAAGAGTAGCAGCTAGAATTGGAAACTCTGCTGTTTCCTGAATAAATCTATATCAACTCCAAATAAGCCTGTTTGACATCCAAAACACACAAATTTGGACACATTCTGCAAGTATAGACATTTTCCTCTGTTAGGGGAAGTGAAAATTATTTTTATCCTTAAAATGAATTAAAGCAATTA-GACCACTACCAAGCAACAACTTAAAGTTTGAATCTGAACTTTTACGCATGAATCTGTATTGGATTTTCAATCATTTAGGAAGGTGGCCTAATTAGATATAATTTTTGCAGTTGTTGCAGCATTTTATGGGTGGAAATAATCATGTTCTTTGGGAAGACCTGGTATCATATCATGTCTCAGTTGTTGGCTCTCTGGCCTGAAACAATTCACTTCATATCCCCGGGCTTCAGTTTCCTCTTTTGTAAAATTAGAACAGTTTCTGCCACATAATTTGTTTTAAACATTAAAGAAAAATGTGTGTGAAAATAATAATCTGAGTAAACAGAAAACCCCCAGAATGGGAGAAAATATTTGCAGACTATGCATCTGACAAAGGACTAGAAACTAGAATCTACAAGGAACTCAAACAAGTCAACAATAGAAAAAGAAATATTCTCGTTATAAAGTGCTCAAAGGACATAAACAGAGATTCCTCAAAAGAAGATATACAAATGGCCAACAACCATGAAAAAA-TGCTCGACATCACTAATGATCAGATAAATGCAAATTAAATCCAGAATAAAATAGCACCTTACTGCAAATGGCTATTATTAAAAAGTCAAGAAAAATAGATGCTGGTATGTATGTGGATAAAAGAGAATGCTTCTACACTGCTGGTGGGAATGTAAATTAATACAATTTCTATAGAAAACAGTATGGAGATTCCTTAAAGAGCTACAAGTAAATCTACCATTTGATACAGCAATCCTACTAATCACAATTGCAAAGATGTGTAATGAATCTATGTGCCAATTGACTAATGAGTGGATAAAGTAAACGTGGTATATATATA--CTATGGAATACTCCTCTGCCATAAAAAGGATCGCAGTAATGTATTTTGCAGTAACTTGGATGGAGCTGGAGTCCACTATTCTAAGTAAAATAACACAAGAGTGAAAAATAATAATA---TAAAAAGATGTTCCCAATTATAAGTGACAGATAAGCTACGATTATGCAGAGGTATACAGAGTGATATAATGGAATCTAGAGACTCAGAAGGGGGAGGGTGAGACAGGCTAGGCATAAAAGTATTACACATTGGGTACAATGTTCACTACTCGGGTGATGGGTACACTACAAATCTCAGAATTTGCTGCTATATAATTTATCCGTGCAACAGAATAAACACTTGCAGTTCAAGAAAATACTGAAATAAAAATT--AAAAAAAGAAAATGTGTGTAAAAGTACCTATTTTCATGTCTGATACCCAGTAAGCATTAAATAAATGTGAGTTCATTTCCTCTTTATTTGTACACAGAGTCATCTCCAAGGGCCTTTGGTTAGATCCTATACATTTCTTAATTTAGAAAATCCCCTAAGAAGTATAGTTGTAGCAGAGGACTAGAATATCTAGAGCAGTAATTTTTAAAGTGAAAGGGTAGAAAATAAGTGTTACTTGAAAAAACATATTCCTTATTACAACAAATATATTTGGAAAACAAAATTAAAAATGTCATTATTGTTTCTACAATAAAAACTGTGAAAGTACAGATCTACAAAATCTTCTTAGCTGTCGGGCATTTAGTACTTGGAAAATGTCAATGTGATGGAGCAGATTTTTCTACAAGTCCAGGGTCTGGTTCCTAAGAAGGCAAGTTCACAGTAACCTTGTAGTGAAATGTTTATGTTTCTCAAAGGGAACCTTGGTTTTAAAAGATTGAGAAATGCCGACTGAGTGTCATTGTCACTGTGGAAATCAGATTTCAGAAAGTTTTATCTTTTTTCTTGCATTTTCTCATTTTTTAAAAAGGGAAATTGCTTACAAAGCATTTGTCTGTGGTCTAAAAGTTGAAGCTCTCATGATGACATTACCTGAAAGAAATATAATGCCAATTGGGAAAGGATACTCAGTTCTCTTGGAGATCTGAACTACACTTCCAGAATGTCCTCTCTAGATAGATTTCCCTATTAAGATTCCATTATTCACCACTCCATAACATTTAACTCTTCGT-AGGTATCTAACAGTCTAAATCAAATCATTGGATTACTAGGAAGGAAATTAGAAACCATCTATTCCAAGCCCTCTCCCATTATAATAGACGAGATTATTGAGACCTACAGAAATGAAATAACTCACCAAAGGCCACACCAGTCATTGGCAGAACTTGAACTATAACATAGACTTCTGACTCCTTGTGTATTAATATATCTATTTTATCACTCTACCTGTGATGTATATGAATTGATACTAGGAGAAAACTTTCCCACAAAATATACTGATCTGAAGAATAAATAAACCTTTTTGCCAAAAGCTTTTAAAATAAATCATAGACCCCCAGGAAGCCATTGCCATGACTGTGAGAACTTTTAGAAAGTCTCATTTTACTATAAACAGCTCTGTTCTCTTTGCTTGAGCCATTACAG   [4827]
C_albigularis_89M009       TTTCCTTTACAGGGACATGGATGGAGTTGGAAGTCATTATCCTCAGCAATCTAATGCAGGAATTGAAAACCAAACACCACATGTTCTCACTTATAAATGGGAGCTGAATTATGAGAACACATGGACACATGGTGAGAAACAACAAACATTGGAGTCTGTTGGGGGCTGTTTGGTGAGAGAGAGCATCAGGAAGAATAGCTAATGGATGCTGGGCTGAATAATTAGGTGATGGGATGATCTTTTCAGCAAATGACCATGACACACATTTACCTCTGTCACAACCTTGCACATCCTGCACATGTATCCCTAAACTTAAAGTAAAAGTTGAAGAAAAAAAAA-TGGAAAGAAAAACAAAGATCAAAGTATGTCTCTAAAGATATTCCTGATAATAAAAATGGCACAATGTTATGACTAAAACTTCATCATATTCCTTTTTTACCTGGAGCCCAATTCAGAGGTCAATA-----CTTCTGTCTCAATATCGCATCTCAACTCCCATTTTTTCCTTACATCAGGCAACCCTACTCTCACTCCCCTCTTCTTCAAACTCCTACTGAATTTGTAGGCTGCACTGTGAGAAGGTAAGACTACAGAGCATAGGCACATATTAACAGAGCCTTAGGCATTTTTGCTTGTAAAGTCTCTCCCATGAACCACTCTCCCAAACAACAGCCATAATCTTTCTCCTTTCTGCTACTGAAGAAAATGTGGTCAAAGCAAGAATAATAAGGTTTTGGTCTAAGAAATCTGAAGACCTAAGAGCTTAAAAGCAGGCAATCCAGCTTTCTATTTGAAATCCAACAGGAATCCCTTAAGCTTAATTAGGAATTTGGTCACTGAAAACTTTATTTTATGGAAATAACTAAATGTTTTCTCACAATACAAATGTGTGGCAGGTCTTTAAATGTGATTCTTTGGAGCTGAGTCCAAAACCTTACTAGATACTAGTACCATCTACCCCAAAGTAGCTGCTCTTTCCAACCAACTAGCTCAGCGTTGTGGTTTTCACAAAGTTACAGCCAAAGTGAGCTTATATTATTATGGCATCAGAATTTATATTAGTTTTCTAAGTCCCAGTGAAGAAATTTCCACATCCTGTCAGTAACTAGCTAAGTGCTATTCACATGTTACCTCTAATCTTTGTAAGAATTCTGAGTTAATTATTACTATAATCCTTTACAGATTAGAAAATGGAGTCTCAGCAGGAGTAAGTGACTTTCTGCAAGTCAGAGTTATTATGATTTTAACTGTAATAAGGCTTTTCATAAGCAC-GAAAGTTGAAGTTATTTTTAACTGAATAACTTATTATATGGACAGAAACATATTTTAAAGTGGTATTTCTGTGGATAAGACTGTTCCTCGGAGATAAAAAAAAAAAAAAAA--GCTATTGTTTTCGGTTCTAGTCCTACCAGTTTTATGCATACGCACTATGCATATAAGGCAAATTGCCGCCCACAAGGTGTCAGGATAGGGTTATATCAAAACTAACGTTCTTTATGGAGTTGTGCTTATGAATTCAAATTATAACAAATCTGCAGATAGAAGTACTGGAAGAATTTCTTTACAACAGGAATGAACTGAGCAGGACAAGACTTGCTGTAAGATAGAGAAGACTCAAAAGCAGTAGAATTTTTAGAAAAGTGTACTGGATTTGTAGCTAAGATACTTGGATATCAGTAATATTTAAATATTATTTGTGCTGCTCTGATATGCTCTTTCCCTTCTGTGAGTTTCATTTCCTTATTATTAAAATAATATGATTTAAACTAGATGACCTTTAACTCCCTTCTAGCTCTCATTTGGCATGATTTCATGAGCATTCCCCCTCTGAATCCTGCCCCTAACTAATACCATCACCATTGCGACTGCTGCCACTTATGCAGCTGGTACCAACTCCATAAATCTTCGCTCTCAATCTTCCCCGTCTTTTCACCACTCATCAGTAAATCACTGGCACCACTAAGTAAACATGTTTATCAAATTTACTTCTCCATTTTATTTGATGCTGAAGCCTGTCTGTGGGTTTGTCATCCTGGGAGGAGAAGAAATAATTAAACAGAAAAAAA-GTTGCTGATGGGGGCCCCTCCCACTCTCTAGAGGACAACTTTTAAATGTCATCTGGGAACTGAACTTGCTTTGCCTCATCTTAAATTTTTCTTTTATTTTTAACCACTAAATTTCACATGAATTATCCAAAACAATCTGATCTCCATGACCCTGGTGTTCTTTATTCAGCCGCTTACAACCAGAACCAAAGAGTAGCAGCTAGAATTGGAAACTCTGCTGTTTCCTGAATAAATCTATATCAACTCCAAATAAGCCTGTTTGACATCCAAAACACACAAATTTGGACACATTCTGCAAGTATAGACATTTTCCTCTGTTAGGGGAAGTGAAAATTATTTTTATCCTTAAAATGAATTAAAGCAATTA-GACCACTACCAAGCAAGAACTTAAAGTTTGAATCTGAACTTTTACGCATGAATCTGTATTGGATTTTCAATCATTTAGGAAGGTGGCCTAATTAGATATAATTTTTGCAGTTGTTGCAGCATTTTATGGGTGGAAATAATCATGTTCTTTGGGAAGACCTGGTATCATATCATGTCTCAGTTGTTGGCTCTCTGGCCTGAAACAATTCACTTCATATCCCCGGGCTTCAGTTTCCTCTTTTGTAAAATTAGAACAGTTTCTGCCACATAATTTGTTTTAAACATTAAAGAAAAATGTGTGTGAAAATAATAATCTGAGTAAACAGAAAACCCCCAGAATGGGAGAAAATATTTGCAGACTATGCATCTGACAAAGGACTAGAAACTAGAATCTACAAGGAACTCAAACAAGTCAACAATAGAAAAAGAAATATTCTCGTTATAAAGTGCTCAAAGGACATAAACAGAGATTCCTCAAAAGAAGATATACAAATGGCCAACAACCATGAAAAAA-TGCTCGACATCACTAATGATCAGATAAATGCAAATTAAATCCAGAATAAAATAGCACCTTACTGCAAATGGCTATTATTAAAAAGTCAAGAAAAATAGATGCTGGTATGTATGTGGATAAAAGAGAATGCTTCTACACTGCTGGTGGGAATGTAAATTAATACAATTTCTATAGAAAACAGTATGGAGATTCCTTAAAGAGCTACAAGTAAATCTACCATTTGATACAGCAATCCTACTAATCACAATTGCAAAGATGTGCAATGAATCTATGTGCCAATTGATTAATGAGTGGATAAAGTAAACGTGGTATATATATA--CTATGGAATACTCCTCTGCCATAAAAAGGATCGCAGTAATGTATTTTGCAGTAACTTGGATGGAGCTGGAGTCCACTATTCTAAGTAAAATAACACAAGAGTGAAAAATAATAATA---TAAAAAGATGTTCCCAATTATAAGTGACAGATAAGCTACGATTATGCAGAGGTATACAGAGTGATATAATGGAATCTAGAGACTCAGAAGGGGGAGGGTGAGACAGGCTAGGCATAAAAGTATTACACATTGGGTACAATGTTCACTACTCGGGTGATGGGTACACTAAAAATCTCAGAATTTGCTGCTATATAATTTATCCGTGCAACAGAATAAACACTTGCAGTTCAAGAAAATACTGAAATAAAAATT--AAAAAAAGAAAATGTGTGTAAAAGTACCTATTTTCATGTCTGATACCCAGTAAGCATTAAATAAATGTGAGTTCATTTCCTCTTTATTTGTACACAGAGTCATCTCCAAGGGCCTTTGGTTAGATCCTATACATTTCTTAATTTAGAAAATCCCCTAAGAAGTGTAGTTGTAGCAGAGGACTAGAATATCTAGAGCAGTAATTTTTAAAGTGAAAGGGTAGAAAATAAGTGTTACTTGAAAAAACATATTCCTTATTACAACAAATATATTTGGAAAACAAAATTAAAAATGTCATTATTGTTTCTACAATAAAAACTGTGAAAGTACAGATCTACAAAATCTTCTTAGCTGTCGGGCATTTAGTACTTGGAAAATGTCAATGTGATGGAGCAGATTTTTCTACAAGTCCAGGGTCTGGTTCCTAAGAAGGCAAGTTCACAGTAACCTTGTAGTGAAATGTTTATGTTTCTCAAAGGGAACCTTGGTTTTAAAAGATTGAGAAATGCCGACTGAGTGTCATTGTCACTGTGGAAATCAGATTTCAGAAAGTTTTATCTTTTTTCTTGCATTTTCTCATTTTTTAAAAAGGGAAATTGCTTACAAAGCATTTGTCTGTGGTCTAAAAGTTGAAGCTCTCATGATGATATTACCTGAAAGAAATATAATGCCAATTGGGAAAGGATACTCAGTTCTCTTGGAGATCTGAACTACACTTCCAGAATGTCCTCTCTAGATAGATTTCCCTATTAAGATTCCATTATTCACCACTCCATAACATTTAACTCTTCGT-AGGTATCTAACAGTCTAAATCAAATCATTGGATTACTAGGAAGGAAATTAGAAACCATCTATTCCAAGCCCTCTCCCATTATAATAGACGAGATTATTGAGACCTACAGAAATGAAATAACTCACCAAAGGCCACACCAGTCATTGGCAGAACTTGAACTATAACATAGACTTCTGACTCCTTGTGTATTAATATATCTATTTTATCACTCTACCTGTGATGTATATGAATTGATACTAGGAGAAAACTTTCCCACAAAATATACTGATCTGAAGAATAAATAAACCTTTTTGCCAAAAGTTTTTAAAATAAATCATAGACCCCCAGGAAGCCATTGCCATGACTGTGAGAACTTTTAGAAAGTCTCATTTTACTATAAACAGCTCTGTTCTCTTTGCTTGAGCCATTACAG   [4833]
C_nictitans_Newton         TTTCCTTTACTGGGACATGGATGGAGTTGGAAGTCATTATCCTCAGCAATCTAATGCAGGAATTGAAAACCAAACACCACATGTTCTCACTTATAAATGGGAGCTGAATTATGAGAACACATGGACACATGGTGAGAAACAACAAACATTGGAGTCTGTTGGGGGCTGTTTGGTGAGAGAGAGCATCAGGAAGAATAGCTAATGGATGCTGGGCTGAATAATTAGGTGATGGGATGATCTTTTCAGCAAATGACCATGACACACATTTACCTCTGTCACAACCTTGCACATCCTGCACATGTATCCCTAAACTTAAAGTAAAAGTTGAAGAAAAAAAAA-TGGAAAGAAAAACAAAGATCAAAGTATGTCTCTAAAGATATTCCTGATAATAAAAATGGCACAATGTTATGACTAAAACTTCATCATATTCCTTTTTTACCTGGAGCCCAATTCAGAGGTCAATA-----CTTCTGTCTCAATATCGCATCTCAACTCCCATTTTTTCCTTACATCAGGCAACCCTACTCTCACTCCCCTCTTCTTCAAACTCCTACTGAATTTGTAGGCTGCACTGTGAGAAGGTAAGACTACAGAGCATAGGCACATATTAACAGAGCCTTAGGCATTTTTGCTTGTAAAGTCTCTCCCATGAACCACTCTCCCAAACAACAGCCATAATCTTTCTCCTTTCTGCTACTGAAGAAAATGTGGTCAAAGCAAGAATAATAAGGTTTTGGTCTAAGAAATCTGAAGACCTAAGAGCTTAAAAGCAGGCAATCCAGCTTTCTATTTGAAATCCAACAGGAATCCCTTAAGCTTAATTAGGAATTTGGTCACTGAAAACTTTATTTTATGGAAATAACTAAATGTTTTCTCACAATACAAATGTGTGGCAGGTCTTTAAATGTGATTCTTTGGAGCTGAGTCCAAAACCTTACTAGATACTAGTACCATCTACCCCAAAGTAGCTGCTCTTTCCAACCAACTAGCTCAGCGTTGTGGTTTTCACAAAGTTACAGCCAAAGTGAGCTTATATTATTATGGCATCAGAATTTATATTAGTTTTCTAAGTCCCAGTGAAGAAATTTCCACATCCTGTCAGTAACTAGCTAAGTGCTATTCACATGTTACCTCTAATCTTTGTAAGAATTCTGAGTTAATTATTACTATAATCCTTTACAGATTAGAAAATGGAGTCTCAGCAGGAGTAAGTGACTTTCTGCAAGTCAGAGTTATTATGATTTTAACTGTAATAAGGCTTTTCATAAGCAC-GAAAGTTGAAGTTATTTTTAACTGAATAACTTATTATATGGACAGAAACATATTTTAAAGTGGTATTTCTGTGGATAAGACTGTTCCTCGGAGATAAAAAAAAAAAA------GCTATTGTTTTCGGTTCTAGTCCTAGCAGTTTTATGCATACGCACTACGCATATAAGGCAAATTGCCGCCCACAAGGTGTCAGGATAGGGTTATATCAAAACTAACGTTCTTTATGGAGTTGTGCTTATGAATTCAAATTGTAACAAATCTGCAGATAGAAGTACTGGAAGAATTTCTTTACAACAGGAATGAACTGAGCAGGACAAGACTTGCTGTAAGATAGAGAAGACTCAAAAGCAGTAGAATTTTTAGAAAAGTGTACTGGATTTGTAGCTAAGATACTTGGATATCGGTAATATTTAAATATTATTTGTGCTGCTCTGATATGCTCTTTCCCTTCTGTGAGTTTCATTTCCTTATTATTAAAATAATATGATTTAAACTAGATGACCTTTAACTCCCTTCTAGCTCTCATTTGGCATGATTTCATGAGCATTCCCCCTCTGAATCCTGCCCCTAACTAATACTATCACCATTGCGACTGCTGCCACTTATGCAGCTGGTACCAACTCCATAAATCTTCGCTCTCAATCTTCCCCGTCTTTTCACCACTCATCAGTAAGTCACTGGCACCACTAAGTAAACATGTTTATCAAATTTACTTCTCCATTTTATTTGATGCTGAAGCCTGTCTGTGGGTTTGTCATCCTGGGAGGAGAAGAAATAATTAAACAGAAAAAAA-GTTGCTGATGGGGGCCCCTCCCACTCTCTAGAGGACAACTTTTAAATGTCATCTGGGAACTGAACTTGCTTTGCCTCATCTTAAATTTTTCTTTTATTTTTAACCACTAAATTTCACATGAATTATCCAAAACAATCTGATCTCCATGACCCTGGTGTTCTTCATTCAGCCGCTTACAACCAGAACCAAAGAGTAGCAGCTAGAATTGGAAACTCTGCTGTTTCCTGAATAAATCTATATCAACTCCAAATAAGCCTGTTTGACATCCAAAACACACAAATTTGGACACATTCTGCAAGTATAGACATTTTCCTCTGTTAGGGGAAGTGAAAATTATTTTTATCCTTAAAATGAATTAAAGCAATTA-GACCACTACCAAGCAAGAACTTAAAGTTTGAATCTGAACTTTTACGCATGAATCTGTATTGGATTTTCAATCATTTAGGAAGGTGGCCTAATTAGATATAATTTTTGCAGTTGTTGCAGCATTTTATGGGTGGAAATAATCATGTTCTTTGGGAAGACCTGGTATCATATCATGTCTCAGTTGTTGGCTCTCTGGCCTGAAACAATTCACTTCATATCCCCGGGCTTCAGTTTCCTCTTTTGTAAAATTAGAACAGTTTCTGCCACATAATTTGTTTTAAACATTAAAGAAAAATGTGTGTGAAAATAATAATCTGAGTAAACAGAAAACCCCCAGAATGGGAGAAAATATTTGCAGACTATGCATCTGACAAAGGACTAGAAACTAGAATCTACAAGGAACTCAAACAAGTCAACAATAGAAAAAGAAATATTCTCGTTATAAAGTGCTCAAAGGACATAAACAGAGATTCCTCAAAAGAAGATATACAAATGGCCAACAACCATGAAAAAA-TGCTCGACATCACTAATGATCAGATAAATGCAAATTAAATCCAGAATAAAATAGCACCTTACTGCAAATGGCTATTATTAAAAAGTCAAGAAAAATAGATGCTGGTATGTATGTGGATAAAAGAGAATGCTTCTACACTGCTGGTGGGAATGTAAATTAATACAATTTCTATAGAAAACAGTATGGAGATTCCTTAAAGAGCTACAAGTAAATCTACCATTTGATACAGCAATCCTACTAATCACAATTGCAAAGATGTGTAATGAATCTATGTGCCAATTGACTAATGAGTGGATAAAGTAAACGTGGTATATATATA--CTATGGAATACTCCTCTGCCATAAAAAGGATCGCAGTAATGTATTTTGCAGTAACTTGGATGGAGCTGGAGTCCACTATTCTAAGTAAAATAACACAAGAGTGAAAAATAATAATA---TAAAAAGATGTTCCCAATTATAAGTGACAGATAAGCTACGATTATGCAGAGGTATACAGAGTGATATAATGGAATCTAGAGACTCAGAAGGGGGAGGGTGAGACAGGCTAGGCATAAAAGTATTACACATTGGGTACAATGTTCACTACTCGGGTGATGGGTACACTAAAAATCTCAGAATTTGCTGCTATATAATTTATCCGTGCAACAGAATAAACACTTGCAGTTCAAGAAAATACTGAAATAAAAATT--AAAAAAAGAAAATGTGTGTAAAAGTACCTATTTTCATGTCTGATACCCAGTAAGCATTAAATAAATGTGAGTTCATTTCCTCTTTATTTGTACACAGAGTCATCTCCAAGGGCCTTTGGTTAGATCCTACACATTTCTTAATTTAGAAAATCCCCTAAGAAGTGTAGTTGTAGCAGAGGACTAGAATATCTAGAGCAGTAATTTTTAAAGTGAAAGGGTAGAAAATAAGTGTTACTTGAAAAAACATATTCCTTATTACAACAAATATATTTGGAAAACAAAATTAAAAATGTCATTATTGTTTCTACAATAAAAACTGTGAAAGTACAGATCTACAAAATCTTCTTAGCTGTCGGGCATTTAGTACTTGGAAAATGTCAATGTGATGGAGCAGATTTTTCTACAAGTCCAGGGTCTGGTTCCTAAGAAGGCAAGTTCACAGTAACCTTGTAGTGAAATGTTTATGTTTCTCAAAGGGAACCTTGGTTTTAAAAGATTGAGAAATGCCGACTGAGTGTCATTGTCACTGTGGAAATCAGATTTCAGAAAGTTTTATCTTTTTTCTTGCATTTTCTCATTTTTTAAAAAGGGAAATTGCTTACAAAGCATTTGTCTGTGGTCTAAAAGTTGAAGCTCTCATGATGACATTACCTGAAAGAAATATAATGCCAATTGGGAAAGGATACTCAGTTCTCTTGGAGATCTGAACTACACTTCCAGAATGTCCTCTCTAGATATATTTCCCTATTAAGATTCCATTATTCACCACTCCATAACATTTAACTCTTCGT-AGGTATCTAACAGTCTAAATCAAATCATTGGATTACTAGGAAGGAAATTAGAAACCATCTATTCCAAGCCCTCTCCCATTATAATAGACGAGATTATTGAGACCTACAGAAATGAAATAACTCACCAAAGGCCACACCAGTCATTGGCAGAACTTGAACTATAACATAGACTTCTGACTCCTTGTGTATTAATATATCTATTTTATCACTCTACCTGTGATGTATATGAATTGATACTAGGAGAAAACTTTCCCACAAAATATACTGATCTGAAGAATAAATAAACCTTTTTGCCAAAAGCTTTTAAAATAAATCATAGACCCCCAGGAAGCCATTGCCATGACTGTGAGAACTTTTAGAAAGTCTCATTTTACTATAAACAGCTCTGTTCTCTTTGCTTGAGCCATTACAG   [4829]
C_ascanius_41137B          TTTCCTTTACAGGGACATGGATGGAGTTGGAAGTCATTATCCTCAGCAATCTAATGCAGGAATTGAAAACCAAACACCACATGTTCTCACTTATAAATGGGAGCTGAATTATGACAACACATGGACACATGGTGAGAAACAACAAACATTGGAGTCTGTTGGGGGCTGTTTGGTGAGAGAGAGCATCAGGAAGAATAGCTAATGGATGCTGGGCTGAATAATTAGGTGATGGGATGATCTTTTCAGCAAATGACCATGACACACATTTACCTCTGTCACAACCTTGCACATCCTGCACATGTATCCCTAAACTTAAAGTAAAAGTTGAAGAAAAAAAAA-TGGAAAGAAAAACAAAGATCAAAGTATGTCTCTAAAGATATTCCTGATAATAAAAATGGCACAATGTTATGACTAAAACTTCATCATATTCCTTTTTTACCTGGAGCCCAATTCAGAGGTCAATA-----CTTCTGTCTCAATATCGCATCTCAACTCCCATTTTTTCCTTACATCAGGCAACCCTACTCTCACTCCCCTCTTCTTCAAACTCCTACTGAATTTGTAGGCTGCACTGTGAGAAGGTAAGACTACAGAGCATAGGCACATATTAACAGAGCCTTAGGCATTTTTGCTTGTAAAGTCTCTCCCATGAACCACTCTCCCAAACAACAGCCATAATCTTTCTCCTTTCTGCTACTGAAGAAAATGTGGTCAAAGCAAGAATAATAAGGTTTTGGTCTAAGAAATCTGAAGACCTAAGAGCTTAAAAGCAGGCAATCCAGCTTTCTATTTGAAATCCAACAGGAATCCCTTAAGCTTAATTAGGAATTTGGTCACTGAAAACTTTATTTTATGGAAATAACTAAATGTTTTCTCACAATACAAATGTGTGGCAGGTCTTTAAATGTGATTCATTGGAGCTGAGTCCAAAACCTTACTAGATACTAGTACCATCTACCCCAAAGTAGCTGCTCTTTCCAACCAACTAGCTCAGCGTTGTGGTTTTCACAAAGTTACAGCCAAAGTGAGCTTATATTATTATGGCATCAGAATTTATATTAGTTTTCTAAGTCCCAGTGAAGAAATTTCCACATCCTGTCAGTAACTAGCTAAGTGCTATTCACATGTTACCTCTAATCTTTGTAAGAATTCTGAGTTAATTATTACTATAATCCTTTACAGATTAGAAAATGGAGTCTCAGCAGGAGTAAGTGACTTTCTGCAAGTCAGAGTTATTATGATTTTAACTGTAATAAGGCTTTTCATAAGCAC-GAAAGTTGAAGTTATTTTTAACTGAATAACTTATTATATGGACAGAAACATATTTTAAAGTGGTATTTCTGTGGATAAGACTGTTCCTCGGAGATAAAAAAAAAAAA------GCTATTGTTTTCGGTTCTAGTCCTAGCAGTTTTATGCATACGCACTACACATATAAGGCAAATTGCCGCCCACAAGGTGTCAGGATAGGGTTATATCAAAACTAACGTTCTTTATGGAGTTGTGCTTATGAATTCAAATTATAACAAATCTGCAGATAGAAGTACTGGAAGAATTTCTTTACAACAGGAATGAACTGAGCAGGACAAGACTTGCTGTAAGATAGAGAAGACTCAAAAGCAGTAGAATTTTTAGAAAAGTGTACTGGATTTGTAGCTAAGATACTTGGATATCGGTAATATTTAAATATTATTTGTGCTGCTCTGATATGTTCTTTCCCTTCTGTGAGTTTCATTTCCTCATTATTAAAATAATATGATTTAAACTAGATGACCTTTAACTCCCTTCTAGCTCTCATTTGGCATGATTTCATGAGCATTCCCCCTCTGAATCCTGCCCCTAACTAATACCATCACCATTGCGACTGCTGCCACTTATGCAGCTGGTACCAACTCCATAAATCTTCGCTCTCAATCTTCCCCGTCTTTTCACCACTCATCAGTAAGTCACTGGCACCACTAAGTAAACATGTTTATCAAATTTACTTCTCCATTTTATTTGATGCTGAAGCCTGTCTGTGGGTTTGTCATCCTGGGAGGAGAAGAAATAATTAAACAGAAAAAAA-GTTGCTGATGGGGGCCCCTCCCACTCTCTAGAGGACAACTTTTAAATGTCATCTGGGAACTGAACTTGCTTTGCCTCATCTTAAATTTTTCTTTTATTTTTAACCACTAAATTTCACATGAATTATCCAAAACAATCTGATCTCCATGACCCTGGTGTTCTTCATTCAGCCGCTTACAACCAGAACCAAAGAGTAGCAGCTAGAATTGGAAACTCTGCTGTTTCCTGAATAAATCTATATCAACTCCAAATAAGCCTGTTTGACATCCAAAACACACAAATTTGGACACATTCTGCAAGTATAGACATTTTCCTCTGTTAGGGGAAGTGAAAATTATTTTTATCCTTAAAATGAATTAAAGCAATTA-GACCACTACCAAGCAACAACTTAAAGTTTGAATCTGAACTTTTACGCATGAATCTGTATTGGATTTTCAATCATTTAGGAAGGTGGCCTAATTAGATATAATTTTTGCAGTTGTTGCAGCATTTTATGGGTGGAAATAATCATGTTCTTTGGGAAGACCTGGTATCATATCATGTCTCAGTTGTTGGCTCTCTGGCCTGAAACAATTCACTTCATATCCCCGGGCTTCAATTTCCTCTTTTGTAAAATTAGAACAGTTTCTGCCACATAATTTGTTTTAAACATTAAAGAAAAATGTGTGTGAAAATAATAATCTGAGTAAACAGAAAACCCCCAGAATGGGAGAAAATATTTGCAGACTATGCATCTGACAAAGGACTAGAAACTAGAATCTACAAGGAACTCAAACAAGTCAACAATAGAAAAAGAAATATTCTCGTTATAAAGTGCTCAAAGGACATAAACAGAGATTCCTCAAAAGAAGATATACAAATGGCCAACAACCATGAAAAAA-TGCTCGACATCACTAATGATCAGATAAATGCAAATTAAATCCAGAATAAAATAGCACCTTACTGCAAATGGCTATTATTAAAAAGTCAAGAAAAATAGATGCTGGTATGTATGTGGATAAAAGAGAATGCTTCTACACTGCTGGTGGGAATGTAAATTAATACAATTTCTATAGAAAACAGTATGGAGATTCCTTAAAGAGCTACAAGTAAATCTACCATTTGATACAGCAATCCTACTAATCACAATTGCAAAGATGTGTAATGAATCTATGTGCCAATTGACTAATGAGTGGATAAAGTAAACGTGGTATATATATA--CTATGGAATACTCCTCTGCCATAAAAAGGATCGCAGTAATGTATTTTGCAGTAACTTGGATGGAGCTAGAGTCCATTATTCTAAGTAAAATAACACAAGAGTGAAAAATAATAATA---TAAAAAGATGTTCCCAATTATAAGTGACAGATAAGCTACGATTATGCAGAGGTATACAGAGTGATATAATGGAATCTAGAGACTCAGAAGGGGGAGGGTGAGACAGGCTAGGCATAAAAGTATTACACATTGGGTACAATGTTCACTACTCGGGTGATGGGTACAATAAAAATCTCAGAATTTGCTGCTATATAATTTATCCGTGCAACAGAATAAACACTTGCAGTTCAAGAAAATACTGAAATAAAAATT--AAAAAAAGAAAATGTGTGTAAAAGTACCTATTTTCATGTCTGATACCCAGTAAGCATTAAATAAATGTGAGTTCATTTCCTCTTTATTTGTACACAGAGTCATCTCCAAGGGCCTATGGTTAGATCCTATATATTTCTTAATTTAGAAAATCCCCTAAGAAGTGTAGTTGTAGCAGAGGACTAGAATATCTAGAGCAGTAATTTTTAAAGTGAAAGGGTAGAAAATAAGTGTTACTTGAAAAAACATATTCCTTATTACAACAAATATATTTGGAAAACAAAATTAAAAATGTCATTATTGTTTCTACAATAAAAACTGTGAAAGTACAGATCTACAAAATCTTCTTAGCTGTCGGGCATTTAGTACTTGGAAAATGTCAATGTGATGGAGCAGATTTTTCTACAAGTCCAGGGTCTGGTTCCTAAGAAGGCAAGTTCACAGTAACCTTGTAGTGAAATGTTTATGTTTCTCAAAGGGAACCTTGGTTTTAAAAGATTGAGAAATGCCGACTGAGTGTCATTGTCACTGTGGAAATCAGATTTCAGAAAGTTTTATCTTTTTTCTTGCATTTTCTCATTTTT-AAAAAGGGAAATTGCTTACAAAGCATTTGTCTGTGGTCTAAAAGTTGAAGCTCTCATGATGACATTACCTGAAAGAAATATAATGCCAATTGGGAAAGGATACTCAGTTCTCTTGGAGATCTGAACTACACTTCCAGAATGTCCTCTCTAGATAGATTTCCCTATTAAGATTCCATTATTCACCACTCCATAACATTTAACTCTTCGT-AGGTATCTAATAGTCTAAATCAAATCATTGGATTACTAGGAAGGAAATTAGAAACCATCTATTCCAAGCCCTCTCCCATTATAATAGACGAGATTATTGAGACCTACAGAAATGAAATAACTCACCAAAGGCCACACCAGTCATTGGCAGAACTTGAACTATAACATAGACTTCTGACTCCTTGTGTATTAATATATCTATTTTATCACTCTACCTGTGATGTATATGAATTGATACTAGGAGAAAACTTTCCCACAAAATATACTGATCTGAAGAATAAATAAACCTTTTTGCCAAAAGCTTTTAAAATAAATCATAGACCCCCAGGAAGCCATTGCCATGACTGTGAGAACTTTTAGAAAGTCTCATTTTACTATAAACAGCTCTGTTCTCTTTGCTTGAGCCATTACAG   [4828]
C_cephus_The_Zoo_1         TTTCCTTTACAGGGACATGGATGGAGTTGGAAGTCATTATCCTCAGCAATCTAATGCAGGAATTGAAAACCAAACACCACATGTTCTCACTTATAAATGGGAGCTGAATTATGAGAACACATGGACACATGGTGAGAAACAACAAACATTGGAGTCTGTTGGGGGCTGTTTGGTGAGAGAGAGCATCAGGAAGAATAGCTAATGGATGCTGGGCTGAATAATTAGGTGATGGGATGATCTTTTCAGCAAATTACCATGACACACATTTACCTCTGTCACAACCTTGCACATCCTGCACATGTATCCCTAAACTTAAAGTAAAAGTTGAAGAAAAAAAAA-TGGAAAGAAAAACAAAGATCAAAGTATGTCTCTAAAGATATTACTGATAATAAAAATGGCACAATGTTATGACTAAAACTTCATCATATTCCTTTTTTACCTGGAGCCCAATTCAGAGGTCAATA-----CTTCTGTCTCAATATCGCATCTCAACTCCCATTTTTTCCTTACATCAGGCAACCCTACTCTCACTCCCCTCTTCTTCAAACTCCTACTGAATTTGTAGGCTGCACTGTGAGAAGGTAAGACTACAGAGCATAGGCACATATTAACAGAGCCTTAGGCATTTTTGCTTGTAAAGTCTCTCCCATGAACCACTCTCCCAAACAACAGCCATAATCTTTCTCCTTTCTGCTACTGAAGAAAATGTGGTCAAAGCAAGAATAATAAGGTTTTGGTCTAAGAAATCTGAAGACCTAAGAGCTTAAAAGCAGGCAATCCAGCTTTCTATTTGAAATCCAACAGGAATCCCTTAAGCTTAATTAGGAATTTGGTCACTGAAAACTTTATTTTATGGAAATAACTAAATGTTTTCTCACAATACAAATGTGTGGCAGGTCTTTAAATGTGATTCATTGAAGCTGAGTCCAAAACCTTACTAGATACTAGTACCATCTACCCCAAAGTAGCTGCTCTTTCCAACCAACTAGCTCAGCGTTGTGGTTTTCACAAAGTTACAGCCAAAGTGAGCTTATATTATTATGGCATCAGAATTTATATTAGTTTTCTAAGTCCCAGTGAAGAAATTTCCACATCCTGTCAGCAACTAGCTAAGTGCTATTCACATGTTACCTCTAATCTTTGTAAGAATTCTGAGTTAATTATTACTATAATCCTTTACAGATTAGAAAATGGAGTCTCAGCAGGAGTAAGTGACTTTCTGCAAGTCAGAGTTATTATGATTTTAACTGTAATAAGGCTTTTCATAAGCAC-GAAAGTTGAAGTTATTTTTAACTGAATAACTTATTATATGGACAGAAACATATTTCAAAGTGGTATTTCTGTGGATAAGACTGTTCCTCGGAGATAAAAAAAAAAAAA-----GCTATTGTTTTCGGTTCTAGTCCTAGCAGTTTTATGCATACGCACTACACATATAAGGCAAATTGCCGCCCACAAGGTGTCAGGATAGGGTTATATCAAAACTAACGTTCTTTATGGAGTTGTGCTTATGAATTCAAATTATAACAAATCTGCAGATAGAAGTACTGGAAGAATTTCTTTACAACAGGAATGAACTGAGCAGGACAAGACTTGCTGTAAGATAGAGAAGACTCAAAAGCAGTAGAATTTTTAGAAAAGTGTACTGGATTTGTAGCTAAGATACTTGGATATCGGTAATATTTAAATATTATTTGTGCTGCTCTGATATGCTCTTTCCCTTCTGTGAGTTTCATTTCCTCATTATTAAAATAATATGATTTAAACTAGATGACCTTTAACTCCCTTCTAGCTCTCATTTGGCATGATTTCATGAGCATTCCCCCTCTGAATCCTGCCCCTAACTAATACCATCACCATTGCGACTGCTGCCACTTATGCAGCTGGTACCAACTCCATAAATCTTCGCTCTCAATCTTCCCCGTCTTTTCACCACTCATCAGTAAGTCACTGGCACCACTAAGTAAACATGTTCATCAAATTTACTTCTCCATTTTATTTGATGCTGAAGCCTATCTGTGGGTTTGTCATCCTGGGAGGAGAAGAAATAATTAAACAGAAAAAAA-GTTGCTGATGGGGGCCCCTCCCACTCTCTAGAGGACAACTTTTAAATGTCATCTGGGAACTGAACTTGCTTTGCCTCATCTTAAATTTTTCTTTTATTTTTAACCACTAAATTTCACATGAATTATCCAAAACAATCTGATCTCCATGACCCTGGTGTTCTTCATTCAGCCGCTTACAACCAGAACCAAAGAGTAGCAGCTAGAATTGGAAACTCTGCTGTTTCCTGAATAAATCTATATCAACTCCAAATAAGCCTGTTTGACATCCAAAACACACAAATTTGGACACATTCTGCAAGTATAGACATTTTCCTCTGTTAGGGGAAGTGAAAATTATTTTTATCCTTAAAATGAATTAAAGCAATTA-GACCACTACCAAGCAACAACTTAAAGTTTGAATCTGAACTTTTACGCATGAATCTGTATTGGATTTTCAATCATTTAGGAAGGTGGCCTAATTAGATATAATTTTTGCAGTTGTTGCAGCATTTTATGGGTGGAAATAATCATGTTCTTTGGGAAGACCTGGTATCATATCATGTCTCAGTTGTTGGCTCTCTGGCCTGAAACAATTCACTTCATATCCCCGGGCTTCAGTTTCCTCTTTTGTAAAATTAGAACAGTTTCTGCCACATAATTTGTTTTAAACATTAAAGAAAAATGTGTGTGAAAATAATAATCTGAGTAAACAGAAAACCCCGAGAATGGGAGAAAATATTTGCAGACTATGCATCTGACAAAGGACTAGAAACTAGAATCTACAAGGAACTCAAACAAGTCAACAATAGAAAAAGAAATATTCTCGTTATAAAGTGCTCAAAGGACATAAACAGAGATTCCTCAAAAGAAGATATACAAATGGCCAACAACCATGAAAAAA-TGCTCGACATCACTAATGATCAGTTAAATGCAAATTAAATCCAGAATAAAATAGCACCTTACTGCAAATGGCTATTATTAAAAAGTCAAGAAAAATAGATGCTGGTATGTATGTGGATAAAAGAGAATGCTTCTACACTGCTGGTGGGAATGTAAATTAATACAATTTCTATAGAAAACAGTATGGAGATTCCTTAAAGAGCTACAAGTAAATCTACCATTTGATACAGCAATCCTACTAATCACAATTGCAAAGATGTGTAATGAATCTATGTGCCAATTGACTAACGAGTGGATAAAGTAAACGTGGTATATATATATACTATGGAATACTCCTCTGCCATAAAAAGGATCGCAGTAATGTATTTTGCAGTAATTTGGATGGAGCTGGAGTCCACTATTCTAAGTAAAATAACACAAGAGTGAAAAATAATAATA---TAAAAAGATATTCCCAATTATAAGTGACAGATAAGCTACGATTATGCAGAGGTATACAGAGTGATATAATGGAATCTAGAGACTCAGAAGGGGAAGGGTGAGACAGGCTAGGCATAAAAGTATTACACATTGGGTACAATGTTCACTACTCGGGTGATGGGTACAATAAAAATCTCAGAATTTGCTGCTATATAATTTATCCGTGCAACAGAATAAACACTTGCAGTTCAAGAAAATACTGAAATAAAAATT--AAAAAAAGAAAATGTGTGTAAAAGTACCTATTTTCATGTCTGATACCCAGTAAGCATTAAATAAATGTGAGTTCATTTCCTCTTTATTTGTACACAGAGTCATCTCCAAGGTCCTTTGGTTAGATCCTATACATTTCTTAATTTAGAAAATCCCCTAAGAAGTGTAGTTGTAGCAGAGGACTAGAATATCTAGAGCAGTAATTTTTAAAGTGAAAGGGTAGAAAATAAGTGTTACTTGAAAAAACATATTCCTTATTACAACAAATATATTTGGAAAACAAAATTAAAAATGTCATTATTGTTTCTACAGTAAAAACTGTGAAAGTACAGATCTACAAAATCTTCTTAGCTGTCGGGCATTTAGTACTTGGAAAATGTCAATGTGATGGAGCAGATTTTTCTACAAGTCCAGGGTCTGGTTCCTAAGAAGGCAAGTTCACAGTAACCTTGTAGTGAAATGTTTATGTTTCTCAAAGGGAACCTTGGTTTTAAAAGATTGAGAAATGCCGACTGAGTGTCATTGTCACTGTGGAAATCAGATTTCAGAAAGTTTTATCTTTTTTCTTGCATTTTCTCATTTTT-AAAAAGGGAAATTGCTTACAAAGCATTTGTCTGTGGTCTAAAAGTTGAAGCTCTCATGATGACATTACCTGAAAGAAATATAATGCCAATTGGGAAAGGATACTCAGTTCTCTTGGAGATCTGAACTACACTTCCAGAATGTCCTCTCTAGATAGACTTCCCTATTAAGATTCCATTATTCACCACTCCATAACATTTAACTCTTCGT-AGGTATCTAATAGTCTAAATCAAATCATTGGATTACTAGGAAGGAAATTAGAAACCATCTATTCCAAGCCCTCTCCCATTATAATAGACGAGATTATTGAGACCTACAGAAATGAAATAACTCACCAAAGACCACACCAGTCATTGGCAGAACTTGAACTATAACATAGACTTCTGACTCCTTGTGTATTAATATATCTATTTTATCACTCTACCTGTGATGTATATGAATTGATACTAGGAGAAAACTTTCCCACAAAATATACTGATCTGAAGAATAAATAAACCTTTTTGCCAAAAGCTTTTAAAATAAATCATAGACCCCCAGGAAGCCATTGCCATGACTGTGAGAACTTTTAGAAAGTCTCATTTTACTATAAACAGCTCTGTTCTCTTTGCTTGAGCCATTACAG   [4831]
C_petaurista_1534          TTTCCTTTACAGGGACATGGATGGAGTTGGAAGTCATTATCCTCAGCAATCTAATGCAGGAATTGAAAACCAAACACCACATGTTCTCACTTATAAATGGGAGCTGAATTATGAGAACACATGGACACATGGTGAGAAACAACAAACATTGGAGTCTGTTGGGGGCTGTTTGGTGAGAGAGAGCATCAGGAAGAATAGCTAATGGATGCTGGGCTGAATAATTAGGTGATGGGATGATCTTTTCAGCAAATGACCATGACACACATTTACCTCTGTCACAACCTTGCACATCCTGCACATGTATCCCTAAACTTAAAGTAAAAGTTGAAGAAAAAAAAA-TGGAAAGAAAAACAAAGATCAAAGTATGTCTCTAAAGATATTCCTGATAATAAAAATGGCACAATGTTATGACTAAAACTTCATCATATTCCTTTTTTACCTGGAGCCCAATTCAGAGGTCAATA-----CTTCTGTCTCAATATCGCATCTCAACTCCCATTTTTTCCTTACATCAGGCAACCCTACTCTCACTCCCCTCTTCTTCAAACTCCTACTGAATTTGTAGGCTGCACTGTGAGAAGGTAAGACTACAGAGCATAGGCACATATTAACAGAGCCTTAGGCATTTTTGCTTGTAAAGTCTCTCCCATGAACCACTCTCCCAAACAACAGCCATAATCTTTCTCCTTTCTGCTACTGAAGAAAATGTGGTCAAAGCAAGAATAATAAGGTTTTGGTCTAAGAAATCTGAAGACCTAAGAGCTTAAAAGCAGGCAATCCAGCTTTCTATTTGAAATCCAACAGGAATCCCTTAAGCTTAATTAGGAATTTGGTCACTGAAAACTTTATTTTATGGAAATAACTAAATGTTTTCTCACAATACAAATGTGTGGCAGGTCTTTAAATGTGATTCATTGGAGCTGAGTCCAAAACCTTACTAGATACTAGTACCATCTACCCCAAAGTAGCTGCTCTTTCCAACCAACTAGCTCAGCGTTGTGGTTTTCACAAAGTTACAGCCAAAGTGAGCTTATATTATTATGGCATCAGAATTTATATTAGTTTTCTAAGTCCCAGTGAAGAAATTTCCACATCCTGTCAGTAACTAGCTAAGTGCTATTCACATGTTACCTCTAATCTTTGTAAGAATTCTGAGTTAATTATTACTATAATCCTTTACAGATTAGAAAATGGAGTCTCAGCAGGAGTAAGTGACTTTCTGCAAGTCAGAGTTATTATGATTTTAACTGTAATAAGGCTTTTCATAAGCAC-GAAAGTTGAAGTTATTTTTAACTGAATAACTTATTATATGGACAGAAACATATTTTAAAGTGGTATTTCTGTGGATAAGACTGTTCCTCGGAGATTAAAAAAAA---------GCTATTGTTTTCGGTTCTAGTCCTAGCAGTTTTATGCATACGCACTATGCATATAAGGCAAATTGCCGCCCACAAGGTGTCAGGATAGGGTTATATCAAAACTAACGTTCTTTATGGAGTTGTGCTTATGAATTCAAATTATAACAAATCTGCAGATAGAAGTACTGGAAGAATTTCTTTACAACAGGAATGAACTGAGCAGGACAAGACTTGCTGTAAGATAGAGAAGACTCAAAAGCAGTAGAATTTTTAGAAAAGTGTACTGGATTTGTAGCTAAGATACTTGGATATCGGTAATATTTAAATATTATTTGTGCTGCTCTGATATGCTCTTTCCCTTCTGTGAGTTTCATTTCCTCATTATTAAAATAATATGATTTAAACTAGATGACCTTTAACTCCCTTCTAGCTCTCATTTGGCATGATTTCATGAGCATTCCCCCTCTGAATCCTGCCCCTAACTAATACCATCACCATTGCGACTGCTGCCACTTATGCAGCTGGTACCAACTCCATAAATCTTCGCTCTCAATCTTCCCCGTCTTTTCACCACTCATCAGTAAGTCACTGGCACCACTAAGTAAACATGTTTATCAAATTTACTTCTCCATTTTATTTGATACTGAAGCCTGTCTGTGGGTTTGTCATCCTGGGAGGAGAAGAAATAATTAAACAGAAAAAAA-GTTGCTGATGGGGGCCCCTCCCACTCTCTAGAGGACAACTTTTAAATGTCATCTGGGAACTGAACTTGCTTTGCCTCATCTTAAATTTTTCTTTTATTTTTAACCACTAAATTTCACATGAATTATCCAAAACAATCTGATCTCCATGACCCTGGTGTTCTTCATTCAGCCGCTTACAACCAGAACCAAAGAGTAGCAGCTAGAATTGGAAACTCTGCTGTTTCCTGAATAAATCTATATCAACTCCAAATAAGCCTGTTTGACATCCAAAACACACAAATTTGGACACATTCTGCAAGTATAGACATTTTCCTCTGTTAGGGGAAGTGAAAATTATTTTTATCCTTAAAATGAATTAAAGCAATTA-GACCACTACCAAGCAACAACTTAAAGTTTGAATCTGAACTTTTACGCATGAATCTGTATTGGATTTTCAATCATTTAGGAAGGTGGCCTAATTAGATATAATTTTTGCAGTTGTTGCAGCATTTTATGGGTGGAAATAATCATGTTCTTTGGGAAGACCTGGTATCATATCATGTCTCAGTTGTTGGCTCTCTGGCCTGAAACAATTCACTTCATATCCCCGGGCTTCAGTTTCCTCTTTTGTAAAATTAGAACAGTTTCTGCCACATAATTTGTTTTAAACATTAAAGAAAAATGTGTGTGAAAATAATAATCTGAGTAAACAGAAAACCCCCAGAATGGGAGGAAATATTTGCAGACTATGCATCTGACAAAGGACTAGAAACTAGAATCTACAAGGAACTCAAACAAGTCAACAATAGAAAAAGAAATATTCTCGTTATAAAGTGCTCAAAGGACATAAACAGAGATTCCTCAAAAGAAGATATACAAATGGCCAACAACCATGAAAAAA-TGCTTGACATCACTAATGATCAGATAAATGCAAATTAAATCCAGAATAAAATAGCACCTTACTGCAAATGGCTATTATTAAAAAGTCAAGAAAAATAGATGCTGGTATGTATGTGGATAAAAGAGAATGCTTCTACACTGCTGGTGGGAATGTAAATTAATACAATTTCTATAGAAAACAGTATGGAGATTCCTTAAAGAGCTACAAGTAAATCTACCATTTGATACAGCAATCCTACTAATCACAATTGCAAAGATGTGTAATGAATCTATGTGCCAATTGACTAATGAGTGGATAAAGTAAACGTGGTATATATATA--CTATGGAATACTCCTCTGCCATAAAAAGGATCGCAGTAATGTATTTTGCAGTAACTTGGATGGAGCTGGAGTCCACTATTCTAAGTAAAATAACACAAGAGTGAAAAATAATAATA---TAAAAAGATGTTCCCAATTATAAGTGACAGATAAGCTACGATTATGCAGAGGTATACAGAGTGATATAATGGAATCTAGAGACTCAGAAGGAGGAGGGTGAGACAGGCTAGGCATAAAAGTATTACACATTGGGTACAATGTTCACTACTCGGGTGATGGGTACACTAAAAATCTCAGAATTTGCTGCTATATAATTTATCCGTGCAACAGAATAAACACTTGCAGTTCAAGAAAATACTGAAATAAAAATT--AAAAAAAGAAAATGTGTGTAAAAGTACCTATTTTCATGTCTGATACCCAGTAAGCATTAAATAAATGTGAGTTCATTTCCTCTTTATTTGTACACAGAGTCATCTCCAAGGGCCTTTGGTTAGATCCTATACATTTCTTAATTTAGAAAATCCCCTAAGAAGTGTAGTTGTAGCAGAGGACTAGAATATCTAGAGCAGTAATTTTTAAAGTGAAAGGGTAGAAAATAAGTGTTACTTGAAAAAACATATTCCTTATTACAACAAATATATTTGGAAAACAAAATTAAAAATGTCATTATTGTTTCTACAATAAAAACTGTGAAAGTACAGATCTACAAAATCTTCTTAGCTGTCGGGCATTTAGTACTTGGAAAATGTCAATGTGATTGAGCAGATTTTTCTACAAGTCCAGGGTCTGGTTCCTAAGAAGGCAAGTTCACAGTAACCTTGTAGTGAAATGTTTATGTTTCTCAAAGGGAACCTTGGTTTTAAAAGATTGAGAAATGCCGACTGAGTGTCATCGTCACTGTGGAAATCAGATTTCAGAAAGTTTTATCTTTTTTCTTGCATTTTCTCATTTTTTAAAAAGGGAAATTGCTTACAAAGCATTTGTCTGTGGTCTAAAAGTTGAAGCTCTCATGATGACATTACCTGAAAGAAATATAATGCCAATTGGGAAAGGATATTCAGTTCTCTTGGAGATCTGAACTACACTTCCAGAATGTCCTCTCTAGATAGATTTCCCTATTAAGATTCCATTATTCACCACTCCATAACATTTAACTCTTCGT-AGGTATCTAACAGTCTAAATCAAATCATTGGATTACTAGGAAGGAAATTAGAAACCATCTATTCCAAGCCCTCTCCCATTATAATAGACGAGATTATTGAGACCTACAGAAATGAAATAACTCACCAAAGGCCACACCAGTCATTGGCAGAACTTGAACTATAACATAGACTTCTGACTCCTTGTGTATTAATATATCTATTTTATCACTCTACCTGTGATGTATATGAATTGATACTAGGAGAAAACTTTCCTACAAAATATACTGATCTGAAGAATAAATAAACCTTTTTGCCAAAAGCTTTTAAAATAAATCATAGACCCCCAGGAAGCCATTGCCATGACTGTGAGAACTTTTAGAAAGTCTCATTTTACTATAAACAGCTCTGTTCTCTTTGCTTGAGCCATTACAG   [4826]
C_erythrotis_066_B         TTTCCTTTACAGGGACATGGATGGAGTTGGAAGTCATTATCCTCAGCAATCTAATGCAGGAATTGAAAACCAAACACCACATGTTCTCACTTATAAATGGGAGCTGAATTATGACAACACATGGACACATGGTGAGAAACAACAAACATTGGAGTCTGTTGGGGGCTGTTTGGTGAGAGAGAGCATCAGGAAGAATAGCTAATGGATGCTGGGMTGAATAATTAGGTGATGGGATGATCTTTTCAGCAAATGACCATGACACACATTTACCTCTGTCACAACCTTGCACATCCTGCACATGTATCCCTAAACTTAAAGTAAAAGTTGAAGAAAAAAAA--TGGAAAGAAAAACAAAGATCAAAGTATGTCTCTAAAGATATTCCTGATAATAAAAATGGCACAATGTTATGACTAAAACTTCATCATATTCCTTTTTTACCTGGAGCCCAATTCAGAGGTCAATA-----CTTCTGTCTCAATATCGCATCTCAACTCCCATTTTTTCCTTACATCAGGCAACCCTACTCTCACTCCCCTCTTCTTCAAACTCCTACTGAATTTGTAGGCTGCACTGTGAGAAGGTAAGACTACAGAGCATAGGCACATATTAACAGAGCCTTAGGCATTTTTGCTTGTAAAGTCTCTCCCATGAACCACTCTCCCAAACAACAGCCATAATCTTTCTCCTTTCTGYTACTGAAGAAAATGTGGTCAAAGCAAGAATAATAAGGTTTTGSTCTAAGAAATCTGAAGACCTAAGAGCTTAAAAGCAGGCAATCCAGCTTTCTATTTGAAATCCAACAGGAATCCCTTAAGCTTAATTAGGAATTTGGTCACTGAAAACTTTATTTTATGGAAATAACTAAATGTTTTCTCACAATACAAATGTGTGGCAGGTCTTTAAATGTGATTCATTGGAGCTGAGTCCAAAACCTTACTAGATACTAGTACCATCTACCCCAAAGTAGCTGCTCTTTCCAACCAACTAGCTCAGCGTTGTGGTTTTCACAAAGTTACAGCCAAAGTGAGCTTATATTRTTATGGCATCAGAATTTATATTAGTTTTCTAAGTCCCAGTGAAGAAATTTCCACATCCTGTCAGYAACTAGCTAAGTGCTATTCACATGTTACCTCTAATCTTTGTAAGAATTCTGAGTTAATTATTACTATAATCCTTTACAGATTAGAAAATGGAGTCTCAGCAGGAGTAAGTGACTTTCTGCAAGTCAGAGTTATTATGATTTTAACTGTAATAAGGCTTTTCATAAGCAC-GAAAGTTGAAGTTATTTTTAACTGAATAACTTATTATATGGACAGAAACATATTTCAAAGTGGTATTTCTGTGGATAAGACTGTTCCTCGGAGATAAAAAAAAAAA-------GCTATTGTTTTCGGTTCTAGTCCTAGCAGTTTTATGCATACGCACTACACATATAAGGCAAATTGCCGCCCACAAGGTGTCAGGATAGGGTTATATCAAAACTAACGTTCTTTATGGAGTTGTGCTTATGAATTCAAATTATAACAAATCTGCAGATAGAAGTACTGGAAGAATTTCTTTACAACAGGAATGAACTGAGCAGGACAAGACTTGCTGTAAGATAGAGAAGACTCAAAAGCAGTAGAATTTTTAGAAAAGTGTACTGGATTTGTARCTAAGATACTTGGATATCGGTAATATTTAAATATTATTTGTGCTGCTCTGATATGCTCTTTCCCTTCTGTGAGTTTCATTTCCTCATTATTAAAATAATATGATTTAAACTAGATGACCTTTAACTCCCTTCTAGCTCTCATTTGGCATGATTTCATGAGCATTCCCCCTCTGAATCCTGCCCCTAACTAATACCATCACCATTGCGACTGCTGCCACTTATGCAGCTGGTACCAACTCCATAAATCTTCGCTCTCAATCTTCCCCGTCTTTTCACCACTCATCAGTAAGTCACTGGCACCACTAAGTAAACATGTTCATCAAATTTACTTCTCCRTTTTATTTGATGCTGAAGCCTGTCTGTGGGTTTGTCATCCTGGGAGGAGAAGAAATAATTAAACAGAAAAAAA-GTTGCTGATGGGGGCCCCTCCCACTCTCTAGAGGACAACTTTTAAATGTCATCTGGGAACTGAACTTGCTTTGCCTCATCTTAAATTTTTCTTTTATTTTTAACCACTAAATTTCACATGAATTATCCAAAACAATCTGATCTCCATGACCCTGGTGTTCTTCATTCAGCCGCTTACAACCAGAACCAAAGAGTAGCAGCTAGAATTGGAAACTCTGCTGTTTCCTGAATAAATCTATATCAACTCCAAATAAGCCTRTTTGACATCCAAAACACACAAATTTGGACACATTCTGCAAGTATAGACATTTTCCTCTGTTAGGGRAAGTGAAAATTATTTTTATCCTTAAAATGAATTAAAGCAATTA-GACCACTACCAAGCAACAACTTAAAGTTTGAATCTGAACTTTTACGCATGAATCTGTATTGGATTTTCAATCATTTAGGAAGGTGGCCTAATTAGATATAATTTTTGCAGTTGTTGCAGCATTTTATGGGTGGAAATAATCATGTTCTTTGGGAAGACCTGGTATCATATCATGTCTCAGTTGTTGGCTCTCTGGCCTGAAACAATTCACTTCATATCCCCGGGCTTCAGTTTCCTCTTTTGTAAAATTAGAACAGTTTCTGCCACATAATTTGTTTTAAACATTAAAGAAAAATGTGTGTGAAAATAATAATCTGAGTAAACAGAAAACCCCCAGAATGGGAGAAAATATTTGCAGACTATGCATCTGACAAAGGACTAGAAACTAGAATCTACAAGGAACTCAAACAAGTCAACAATAGAAAAAGAAATATTCTCGTTATAAAGTGCTCAAAGGACATAAACAGAGATTCCTCAAAAGAAGATATACAAATGGCCAACAACCATGAAAAAA-TGCTCGACATCACTAATGATCAGATAAATGCAAATTAAATCCAGAATAAAATAGCACCTTACTGCAAATGGCTATTATTAAAAAGTCAAGAAAAATAGATGCTGGTATGTATGTGGATAAAAGAGAATGCTTCTACACTGCTGGTGGGAATGTAAATTAATACAATTTCTATAGAAAACAGTATGGAGATTCCTTAAAGAGCTACAAGTAAATCTACCATTTGATACAGCAATCCTACTAATCACAATTGCAAAGATGTGTAATGAATCTATGTGCCAATTGACTAACGAGTGGATAAAGTAAACGTGRTATATATATA--CTATGGAATACTCCTCTGCCATAAAAAGGATCGCAGTAATGTATTTTGCAGTAATTTGGATGGAGCTGGAGTCCACTATTCTAAGTAAAATAACACAAGAGTGAAAAATAATAATA---TAAAAAGATGTTCCCAATTATAAGTGACAGATAAGCTACGATTATGCAGAGGTATACAGAGTGATATAATGGAATCTAGAGACTCAGAAGGGGGAGGGTGAGACAGGCTAGGCATAAAAGTATTACACATTGGGTACAATGTTCACTACTCGGGTGATGGGTACAATAAAAATCTCAGAATTTGCTGCTATATAATTTATCCGTGCAACAGAATAAACACTTGCAGTTCAAGAAAATACTGAAATAAAAATT--AAAAAAAGAAAATGTGTGTAAAAGTACCTATTTTCATGTCTGATACCCAGTAAGCATTAAATAAATGTGAGTTCATTTCCTCTTTATTTGTACACAGAGTCATCTCCAAGGKCCTTTGGTTAGATCCTATACATTTCTTAATTTAGAAAATCCYCTAAGAAGTGTAGTTGTAGCAGAGGACTAGAATATCTAGAGCAGTAATTTTTAAAGTGAAAGGGTAGAAAATAAGTGTTACTTGAAAAAACATATTCCTTATTACAACAAATATATTTGGAAAACAAAATTAAAAATGTCATTATTGTTTCTACARTAAAAACTGTGAAAGTACAGATCTACAAAATCTTCTTAGCTGTCGGGCATTTAGTACTTGGAAAATGTCAATGTGATGGAGCAGATTTTTCTACAAGTCCAGGGTCTGGTTCCTAAGAAGGCAAGTTCACAGTAACCTTGTAGTGAAATGTTTATGTTTCTCAAAGGGAACCTTGGTTTTAAAAGATTGAGAAATGCCGACTGAGTGTCATTGTCACTGTGGAAATCAGATTTCAGAAAGTTTTATCTTTTTTCTTGCATTTTCTCATTTTT-AAAAAGGGAAATTGCTTACAAAGCATTTGTCTGTGGTCTAAAAGTTGAAGCTCTCATGATGACATTACCTGAAAGAAATATAATGCCAATTGGGAAAGGATACTCAGTTCTCTTGGAGATCTGAACTACACTTCCAGAATGTCCTCTCTAGATAGATTTCCCTATTAAGATTCCATTATTCACCACTCCATAACATTTAACTCTTCGT-AGGTATCTAATAGTCTAAATCAAATCATTGGATTACTAGGAAGGAAATTAGAAACCATCTATTCCAAGCCCTCTCCCATTATAATAGACGAGATTATTGAGACCTACAGAAATGAAATAACTCACCAAAGGCCACACCAGTCATTGGCAGAACTTGAACTATAACATAGACTTCTGACTCCTTGTGTATTAATATATSTATTTTATCACTCTACCTGTGATGTATATGAATTGATACTAGGAGAAAACTTTCCCACAAAATATACTGATCTGAAGAATAAATAAACCTTTTTGCCAAAAGCTTTTAAAATAAATCATAGACCCCCAGGAAGCCATTGCCATGACTGTGAGAACTTTTAGAAAGTCTCATTTTACTATAAACAGCTCTGTTCTCTTTGCTTGAGCCATTACAG   [4826]
C_mona_SA_BF_3             TTTCCTTTGCAGGGACATGGATGGAGTTGGAAGTCATTATCCTCAGCAATCTAATGCAGGAATTGAAAACCAAACACCACATGTTCTCACTTATAAATGGGAGCTGAATTATGAGAACACATGGACACATGGTGAGAAACAACAAACATTGGAGTCTGTTGGGGGCTGTTTGGTGAGAGAGAGCATCAGGAAGAATAGCTAATGGATGCTGGGCTGAATAATTAGGTGATGGGATGATCTTTTCAGCAAATGACCATGACACACATTTACCTCTGTCACAACCTTGCACATCCTGCACATGTATCCCTAAACTTAAAGTAAAAGTTGAAGAAAAAAAA--TGGAAAGAAAAACAAAGATCAAAGTATGTCTCTAAAGATATTCCTGATAATAAAAATGGCACAATGTTATGACTAAAACTTCATCATATTCCTTTTTTACCTGGAGCCCAATTCAGAGGTCAACA-----CTTCTGTCTCAATATCGCATCTCAACTCCCATTTTTTCCTTACATCAGGCAACCCTACTCTCACTCCCCTCTTCTTCAAACTCCTACTGAATTTGTAGGCTGCACTGTGAGAAGGTAAGACTACAGAGCATAGGCACATATTAACAGAGCCTTAGGCATTTTTGCTTGTAAAGTCTCTCCCATGAACCACTCTCCCAAACAACAGCCATAATCTTTCTCCTTTCTGCTACTGAAGAAAATGTGGTCAAAGCAAGAATAATAAGGTTTTGGTCTAAGAAATCTGAACACCTAAGAGCTTAAAAGCAGGCAATCCAGCTTTCTATTTGAAATCCAACAGGAATCCCTTAAGCTTAATTAGGAATTTGGTCACTGAAAACTTTATTTTATGGAAATAACTAAATGTTTTCTCACAATACAAATGTGTGGCAGGTCTTTAAATGTGATTCATTGGAGCTGAGTCCAAAACCTTACTAGATACCAGTACCATCTACCCCAAAGCAGCTGCTCTTTCCAACCAACTAGCTCAGCGTTGTGGTTTTCACAAAGTTACAGCCAAAGTGAGCTTATATTATTATGGCATCAGAATTTATATTAGTTTTCTAAGTCCCAGTGAAGAAATTTCCACATCCTGTCAGTAACTAGCTAAGTGCTATTCACATGTTACCTCTAATCTTTGTAAGAATTCTTAGTTAATTATTACTATAATCCTTTACAGATTAGAAAATGGAGTCTCAGCAGGAGTAAGTGACTTTCTGCAAGTCAGAGTTATTATGATTTTAACTGTAATAAGGCTTTTCATAAGCAC-GAAAGTTGAAGTTATTTTTAACTGAATAACTTATTATATGGACAGAAACATATTTTAAAGTGGTATTTCTGTGGATAAGACTGTTCCTCGGAGATAAAAAAAAAA--------GCTATTGTTTTCGGTTCTAGTTCTAGCAGTTTTATGCATACGCACTACGCATATAAGGCAAATTGCCGCCCACAAGGTGTCAGGATAGGGTTATATCAAAACTAACGTTCTTTATGGAGTTGTGCTTATGAATTCAAATTATAACAAATCTGCAGATAGAAGTACTGGAAGAATTTCTTTACAACAGGAATGAACTGAGCAGGACAAGACTTGCTGTAAGATAGAGAAGACTCAAAAGCAGTAGAATTTTTAGAAAAGTGTACTGGATTTGTAGCTAAGATACTTGGATATCAGTAATATTTAAATATTATTTGTGCTGCTCTGATATGCTCTTTCCCTTCTGTGAGTTTCATTTCCTCATTATTAAAATAATATGATTTAAACTAGATGACCTTTAACTCCCTTCTAGCTCTCATTTGGCATGATTTCATGAGCATTCCCCCTCTGAATTCTGCCCCTAACTAATACCATCACCATTGCGACTGCTGCCACTTATGCAGCTGGTACCAACTCCATAAATCTTCGCTCTCAATCTTCCCCGTCTTTTCACCACTCATCAGTAAGTCACTGGCACCACTAAGTAAACATGTTTATCAAATTTACTTCTCCATTTTATTTGATGCTGAAGCCTGTCTGTGGGTTTGTCATCCTGGGAGGAGAAGAAATAATTAAACAGAAAAAAA-GTTGCTGATGGGGGCCCCTCCCACTCTCTAGAGGAAAACTTTTAAATGTCATCTGGGAACTGAACTTGCTTTGCCTCATCTTACATTTTTCTTTTATTTTTAACCACTAAATTTCACATGAGTTATCCAAAACAATCTGATCTCCATGACCCTGGTGTTCTTCATTCAGCCGCTTACAACCAGAACCAAAGAGTAGCAGCTAGAATTGGAAACTCTGCTGTTTCCTGAATAAATCTATATCAACTCCAAATAAGCCTGTTTGACATCCAAAGCACACAAATTTGGACACATTCTGCAAGTATAGACATTTTCCTCTGTTAGGGGAAGTGAAAATTATTTTTATCCTTAAAATGAATTAAAGCAATTA-GACCACTACCAAGCAACAACTTAAAGTTTGAATCTGAACTTTTACGCATGAATCTGTATTGGATTTTCAATCATTTAGGAAGGTGGCCTAATTAGATATAATTTTTGCAGTTGTTGCAGCATTTTATGGGTGGAAATAATCATGTTCTTTGGGAAGACCTGGTATCATATCATGTCTCAGTTGTTGGCTCTCTGGCCTGAAACAATTCACTTCATATCCCCGGGCTTCAGTTTCCTCTTTTGTAAAATTAGAATAGTTTCTGCCACATAATTTGTTTTAAACATTAAAGAAAAATGTGTGTGAAAATAATAATCTGAGTAAACAGAAAATCCCCAGAATGGGAGAAAATATTTGCAGACTATGCATCTGACAAAGGACTAGAAACTAGAATCTACAAGGAACTCAAACAAGTCAACAATAGAAAAAGAAATATTCTCGTTATAAAGTGCTCAAAGGACATAAACAGAGATTCCTCAAAAGAAGATATACAAATGGCCAACAACCATGAAAAA--TGCTCGACATCACTAATGATCAGATAAATGCAAATTAAATCCAGAATAAAATAGCACCTTACTGCAAATGGCTATTATTAAAAAGTCAAGAAAAATAGATGCTGGTATGTATGTGGATAAAAGAGAATGCTTCTACACTGCTGGTGGGAATGTAAACTAATACAATTTCTATAGAAAACAGTATGGAGATTCCTTAAAGAGCTACAAGTAAATCTACCATTTGATACAGCAATCCTACTAATCAAAATTGCAAAGATGTGTAATGAATCTATGTGCCAATTGACTAATGAGTGGGTAAAGTAAACGTGGTATATATATA--CTATGGAATACTCCTCTGCCATAAAAAGGATCGCAGTAATGTATTTTGCAGTAACTTGGATGGAGCTGGAGTCCACTATTCTAAGTAAAATAACACAAGAGTGAAAAATAATAATA---TAAAAAGATGTTCCCAATTATAAGTGACAGATAAGCTACGATTATGCAAAGGTATACAGAGTGATATAATGGAATCTAGAGACTCAGAAGGGGGAGGGTGAGACAGGCTAGGCATAAAAGTATTACACATTGGGTACAATGTTCACTACTCGGGTGATGGGTACACTAAAAATCTCAGAATTTACTGCTATATAATTTATCCGTGCAACAGAATAAACACTTGCAGTTCAAGAAAATACTGAAATAAAAATT--AAAAAAAGAAAATGTGTGTAAAAGTACCTATTTTCATGTCTGATACCCAGTAAGCATTAAATAAATGTGAGTTCATTTCCTCTTTATTTGTACACAGAGTCATCTCCGAGGGCCTTTGGTTGGATCCTATACATTTCTTAGTTTAGAAAATCCCCTAAGAAGTGTAGTTGTAGCAGAGGACTAGAATATCTAGAGCAGTAATTTTTAAAGTGAAAGGGTAGAAAATAAGTGTTACTTGAAAAAACATATTCCTTATTATAACAAATATATTTGGAAAACAAAATTAAAAATGTCATTATTGTTTCTACAATAAAAACTGTGAAAGTACAGATCTACAAAATCTTCTTAGCTGTCGGGCATTTAGTACTTGGAAAATGTCAATGTGATGGAGCAGATTTTTCTACAAGTCCAGGGTCTGGTTCTTAGGAAGGCAAGTTCACAGTAACCTTGTAGTGAAACGTTTATGTTTCTCAAAGGGAACCTTGGTTTTAAAAGATTGAGAAATGCCGACTGAGTGTCATTGTCACTGTGGAAATCAGATTTCAGAAAGTTTTATCTTTTTTCTTGCATTTTCTCATTTTTTAAAAAGGGAAATTGCTTACAAAGCATTTGTCTGTGGTCTAAAAGTTGAAGCTCTCATGATGACATTACCTGAAAGAAATATAATGCCAATTGGGAAAGGATACTCAGTTCTCTTGGAGATCTGAACTACACTTCCAGAATGTCCTCTCTAGATAGATTTCCCTATTAAGATTCCATTATTCACCACTCCATAACATTTAACTCTTCGT-AGGTATCTAACAGTCTAAATCAAATCATTGGATTACTAGGAAGGAAATTAGAAACCATCTATTCCAAGCCCTCTCCCATTATAATAGACGAGATTATTGAGACCTACAGAAATGAAATAACTCACCAAAGGCCACACCAGTCATTGGCAGAACTTGAACTATAACATAGACTTCTGACTCCTTGTGTATTAATATATCTATTTTATCACTCTACCTGTGGTGTATATGAATTGATACTAGGAGAAAACTTTCCCACAAAATATACTGATCTGAAGAATAAATAAACCTTTTTGCCAAAAGCTTTTAAAATAAATCATAGACCCCCAGGAAGCCATTGCCATGACTGTGAGAACTTTTAGAAAGTCTCATTTTACTATAAACAGCTCTGTTCTCTTTGCTTGAGCCATTACAG   [4825]
C_wolfi_Nguma              TTTCCTTTGCAGGGACATGGATGGAGTTGGAAGTCATTATCCTCAGCAATCTAATGCAGGAATTGAAAACCAAACACCACATGTTCTCACTTATAAATGGGAGCTGAATTATGAGAACACATGGACACATGGTGAGAAACAACAAACATTGGAGTCTGTTGGGGGCTGTTTGGTGAGAGAGAGCATCAGGAAGAATAGCTAATGGATGCTGGGCTGAATAATTAGGTGATGGGATGATCTTTTCAGCAAATGACCATGACACACATTTACCTCTGTCACAACCTTGCACATCCTGCACATGTATCCCTAAACTTAAAGTAAAAGTTGAAGAAAAAAAA--TGGAAAGAAAAACAAAGATCAAAGTATGTCTCTAAAGATATTCCTGATAATAAAAATGGCACAATGTTATGACTAAAACTTCATCATATTCCTTTTTTACCTGGAGCCCAATTCAGAGGTCAACA-----CTTCTGTCTCAATATCGCATTTCAACTCCCATTTTTTCCTTACATCAGGCAACCCTACTCTCACTCCCCTCTTCTTCAAACTCCTACTGAATTTGTAGGCTGCACTGTGAGAAGGTAAGACTACAGAGCATAGGCACATATTAACAGAGCCTTAGGCATTTTTGCTTGTAAAGTCTCTCGCATGAACCACTCTCCCAAACAACAGCCATAATCTTTCTCCTTTCTGCTACTGAAGAAAATGTGGTCAAAGCAAGAATAATAAGGTTTTGGTCTAAGAAATCTGAACACCTAAGAGCTTAAAAGCAGGCAATCCAGCTTTCTATTTGAAATCCAACAGGAATCCCTTAAGCTTAATTAGGAATTTGGTCACTGAAAACTTTATTTTATGGAAATAACTAAATGTTTTCTCACAATACAAATGTGTGGCAGGTCTTTAAATGTGATTCATTGGAGCTGAGTCCAAAACCTTACTAGATACTAGTACCATCTACCCCAAAGCAGCTGCTCTTTCCAACCAACTAGCTCAGCGTTGTGGTTTTCACAAAGTTACAGCCAAAGTGAGCTTATATTATTATGGCATCAGAATTTATATTAGTTTTCTAAGTCCCAGTGAAGAAATTTCCACATCCTGTCAGTAACTAGCTAAGTGCTATTCACATGTTACCTCTAATCTTTGTAAGAATTCTGAGTTAATTATTACTATAATCCTTTACAGATTAGAAAATGGAGTCTCAGCAGGAGTAAGTGACTTTCTGCAAGTTAGAGTTATTATGATTTTAACTGTAATAAGGCTTTTCATAAGCAC-GAAAGTTGAAGTTATTTTTAACTGAATAACTTATTATATGGACAGAAACATATTTTAAAGTGGTATTTCTGTGGATAAGACTGTTCCTCGGAGATAAAAAAAAA---------GCTATTGTTTTCGGTTCTAGTTCTAGCAGTTTTATGCATAAGCACTACGCATATAAGGTAAATTGCCGCCCACAAGGTGTCAGGATAGGGTTATATAAAAACTAACGTTCTTTATGGAGTTGTGCTTATGAATTCAAATTATAACAAATCTGCAGATAGAAGTACTGGAAGAATTTCTTTACAACAGGAATGAACTGAGCAGGACAAGACTTGCTGTAAGATAGAGAAGACTCAAAAGCAGTAGAATTTTTAGAAAAGTGTACTGCATTTGTAGCTAAGATACTTGGATATCAGTAATATTTAAATATTATTTGTGCTGCTCTGATATGCTCTTTCCCTTCTGTGAGTTTCATTTCCTCATTATTAAAATAATATGATTTAAACTAGATGACCTTTAACTCCCTTCTAGCTCTCATTTGGCATGATTTCATGAGCATTCCCCCTCTGAATCCTGCCCCTAACTAATACCATCACCATTGCGACTGCTGCCACTTATGCAGCTGGTACCAACTCCGTAAATCTTCGCTCTCAATCTTCCCCGTCTTTTCACCACTCATCAGTAAGTCACTGGCACCACTAAGTAAACATGTTTATCAAATTTACTTCTCCATTTTATTTGATGCTGAAGCCTGTCTGTGGGTTTGTCATCCTGGGAGGAGAAGAAATAATTAAACAGAAAAAAA-GTTGCTGATGGGGGCCCCTCCCACTCTCTAGAGGACAACTTTTAAATGTCATCTGGGAACTGAACTTGCTTTGCCTCATCTTACATTTTTCTTTTATTTTTAACCACTAAATTTCACATGAATTATCCAAAACAATCTGATCTCCATGACCCTGGTGTTCTTCATTCAGCCGCTTACAACCAGAACCAAAGAGTAGCAGCTAGAATTGGAAACTCTGCTGTTTCCTGAATAAATCTATATCAACTCCAAATAAGCCTGTTTGACATCCAAAACACACAAATTTGGACACATTCTGCAAGTATAGACATTTTCCTCTGTTAGGGGAAGTGAAAATTATTTTTATCCTTAAAATGAATTAAAGCAATTA-GACCACTACCAAGCAACAACTTAAAGTTTGAATCTGAACTTTTACGCATGAATCTGTATTGGATTTTCAATCATTTAGGAAGGTGGCCTAATTAGATATAATTTTTGCAGTTGTTGCAGCATTTTATGGGTGGAAATAATCATGTTCTTTGGGAAGACCTGGTATCATATCATGTCTCAGTTGTTGGCTCTCTGGCCTGAAACAATTCACTTCATATCCCCGGGCTTCAGTTTCCTCTTTTATAAAATTAGAATAGTTTCTGCCACATAATTTGTTTTAAACATTAAAGAAAAATGTGTGTGAAAATAATAATCTGAGTAAACAGAAAACCCCCAGAATGGGAGAAAATATTTGCAGACTATGCATCTGACAAAGGACTAGAAACTAGAATCTACAAGGAACTCAAACAAGTCAACAATAGAAAAAGAAATATTCTCGTTATAAAGTGCTCAAAGGACATAAACAGAGATTCCTCAAAAGAAGATATACAAATGGCCAACAACCATGAAAAAA-TGCTCGACATCACTAATGATCAGATAAATGCAAATTAAATCCAGAATAAAATAGCACCTTACTGCAAATGGCTATTATTAAAAAGTCAAGAAAAATAGATGCTGGTATGTATGTGGATAAAAGAGAATGCTTCTACACTGCTGGTGGGAATGTAAATTAATACAATTTCTATAGAAAACAGTATGGAGATTCCTTAAAGAGCTACAAGTAAATCTACCATTTGATACAGCAATCCTACTAATCACAATTGCAAAGATGTGTAATGAATCTATGTGCCAATTGACTAATGAGTGGATAAAGTAAACGTGGTATATATATA--CTATGGAATACTCCTCTGCCATAAAAAGGATCGCAGTAATGTATTTTGCAGTAACTTGGATGGAACTGGAGTCCACTATTCTAAGTAAAATAACACAAGAGTGAAAAATAATAATA---TAAAAAGATGTTCCCAATTATAAGTGACAGATAAGCTACGATTATGCAAAGGTATACAGAGTGATATAATGGAATCTAGAGACTCAGAAGGGGGAGGGTGAGACAGGCTAGGCATAAAAGTATTACACATTGGGTACAATGTTCACTACTCGGGTGATGGGTACACTAAAAATCTCAGAATTTACTGCTATATAATTTATCCGTGCAACAGAATAAACACTTGCAGTTCAAGAAAATACTGAAATAAAAATT--AAAAAAAGAAAATGTGTGTAAAAGTACCTATTTTCATGTCTGATACCCAGTAAGCATTAAATAAATGTGAGTTCATTTCCTTTTTATTTGTACACAGAGTCATCTCCGAGGGCCTTTGGTTGGATCCTATACATTTCTTAGTTTAGAAAATCCCCTAAGAAGTGTAGTTGTAGCAGAGGACTAGAATATCTAGAGCAGTAATTTTTAAAGTGAAAGGGTAGAAAATAAGTGTTACTTGAAAAAACATATTCCTTATTATAACAAATATATTTGGAAAACAAAATTAAAAATGTCATTATTGTTTCTACAATAAAAACTGTGAAAGTACAGATATACAAAATCTTCTTAGCTGTCGGGCATTTAGTACTTGGAAAATGTCAATGTGATGGAGCAGATTTTTCTACAAGTCCAGGGTCTGGTTCCTAGGAAGGCAAGTTCACAGTAACCTTGTAGTGAAATGTTTATGTTTCTCAAAGGGAACCTTGGTTTTAAAAGATTGAGAAATGCCGACTGAGTGTCATTGTCACTGTGGAAATCAGATTTCAGAAAGTTTTATCTTTTTTCTTGCATTTTCTCATTTTTTAAAAAGGGAAATTGCTTACAAAGCATTTGTCTGTGGTCTAAAAGTTGAAGCTCTCATGATGACATTACCTGAAAGAAATATAATGCCAATTGGGAAAGGATACTCAGTTCTCTTGGAGATCTGAACTACACTTCCAGAATGTCCTCTCTAGATAGATTTCCCTATTAAGATTCCATTATTCACCACTCCATAACATTTAACTCTTCGT-AGGTATCTAACAGTCTAAATCAAATCATTGGATTACTAGGAAGGAAATTAGAAACCATCTATTCCAAGCCCTCTCCCATTATAATAGACGAGATTATTGAGACCTACAGAAATGAAATAACTCACCAAAGGCCACACCAGTCATTGGCAGAACTTGAACTATAACATAGACTTCTGACTCCTTGTGTATTAATATATCTATTTTATCACTCTACCTGTGGTGTATATGAATTGATACTAGGAGAAAACTTTCCCACAAAATACACTGATCTGAAGAATAAATAAACCTTTTTGCCAAAAGCTTTTAAAATAAATCATAGACCCCCAGGAAGCCATTGCCATGACTGTGAGAACTTTTAGAAAGTCTCATTTTACTATAAACAGCTCTGTTCTCTTTGCTTCAGCCATTACAG   [4825]
C_pogonias_108_G           TTTCCTTTGCAGGGACATGGATGGAGTTGGAAGTCATTATCCTCAGCAATCTAATGCAGGAATTGAAAACCAAACACCACATGTTCTCACTTATAAATGGGAGCTGAATTATGAGAACACATGGACACATGGTGAGAAACAACAAACATTGGAGTCTGTTGGGGGCTGTTTGGTGAGAGAGAGCATCAGGAAGAATAGCTAATGGATGCTGGGCTGAATAATTAGGTGATGGGATGATCTTTTCAGCAAATGACCATGACACACATTTACCTCTGTCACAACCTTGCACATCCTGCACATGTATCCCTAAACTTAAAGTAAAAGTTGAAGAAAAAAAA--TGGAAAGAAAAACAAAGATCAAAGTATGTCTCTAAAGATATTCCTGATAATAAAAATGGCACAATGTTATGACTAAAACTTCATCATATTCCTTTTTTACCTGGAGCCCAATTCAGAGGTCAACA-----CTTCTGTCTCAATATCGCATTTCAACTCCCATTTTTTCCTTACATCAGGCAACCCTACTCTCACTCCCCTCTTCTTCAAACTCCTACTGAATTTGTAGGCTGCACTGTGAGAAGGTAAGACTACAGAGCATAGGCACATATTAACAGAGCCTTAGGCATTTTTGCTTGTAAAGTCTCTCGCATGAACCACTCTCCCAAACAACAGCCATAATCTTTCTCCTTTCTGCTACTGAAGAAAATGTGGTCAAAGCAAGAATAATAAGGTTTTGGTCTAAGAAATCTGAACACCTAAGAGCTTAAAAGCAGGCAATCCAGCTTTCTATTTGAAATCCAACAGGAATCCCTTAAGCTTAATTAGGAATTTGGTCACTGAAAACTTTATTTTATGGAAATAACTAAATGTTTTCTCACAATACAAATGTGTGGCAGGTCTTTAAATGTGATTCATTGGAGCTGAGTCCAAAACCTTACTAGATACTAGTACCATCTACCCCAAAGCAGCTGCTCTTTCCAACCAACTAGCTCAGCGTTGTGGTTTTCACAAAGTTACAGCCAAAGTGAGCGTATATTATTATGGCATCAGAATTTATATTAGTTTTCTAAGTCCCAGTGAAGAAATTTCCACATCCTGTCAGTAACTAGCTAAGTGCTATTCACATGTTACCTCTAATCTTTGTAAGAATTCTGAGTTAATTATTACTATAATCCTTTACAGATTAGAAAATGGAGTCTCAGCAGGAGTAAGTGACTTTCTGCAAGTTAGAGTTATTATGATTTTAACTGTAATAAGGCTTTTCATAAGCAC-GAAAGTTGAAGTTATTTTTAACTGAATAACTTATTATATGGACAGAAACATATTTTAAAGTGGTATTTCTGTGGATAAGACTGTTCCTCGGAGATAAAAAAAAA---------GCTATTGTTTTTGGTTCTAGTTCTAGCAGTTTTATGCATAAGCACTACGCATATAAGGTAAATTGCCGCCCACAAGGTGTCAGGATAGGGTTATATAAAAACTAACGTTCTTTATGGAGTTGTGCTTATGAATTCAAATTATAACAAATCTGCAGATAGAAGTACTGGAAGAATTTCTTTACAACAGGAATGAACTGAGCAGGACAAGACTTGCTGTAAGATAGAGAAGACTCAAAAGCAGTAGAATTTTTAGAAAAGTGTACTGCATTTGTAGCTAAGATACTTGGATATCAGTAATATTTAAATATTATTTGTGCTGCTCTGATATGCTCTTTCCCTTCTGTGAGTTTCATTTCCTCATTATTAAAATAATATGATTTAAACTAGATGACCTTTAACTCCCTTCTAGCTCTCATTTGGCATGATTTCATGAGCATTCCCCCTCTGAATCCTGCCCCTAACTAATACCATCACCATTGCGACTGCTGCCACTTATGCAGCTGGTACCAACTCCGTAAATCTTCGCTCTCAATCTTCCCCGTCTTTTCACCACTCATCAGTAAGTCACTGGCACCACTAAGTAAACATGTTTATCAAATTTACTTCTCCATTTTATTTGATGCTGAAGCCTGTCTGTGGGTTTGTCATCCTGGGAGGAGAAGAAATAATTAAACAGAAAAAAA-GTTGCTGATGGGGGCCCCTCCCACTCTCTAGAGGACAACTTTTAAATGTCATCTGGGAACTGAACTTGCTTTGCCTCATCTTACATTTTTCTTTTATTTTTAACCACTAAATTTCACATGAATTATCCAAAACAATCTGATCTCCATGACCCTGGTGTTCTTCATTCAGCCGCTTACAACCAGAACCGAAGAGTAGCAGCTAGAATTGGAAACTCTGCTGTTTCCTGAATAAATCTATATCAACTCCAAATAAGCCTGTTTGACATCCAAAACACACAAATTTGGACACATTCTGCAAGTATAGACATTTTCCTCTGTTAGGGGAAGTGAAAATTATTATTATCCTTAAAATGAATTAAAGCAATTA-GACCACTACCAAGCAACAACTTAAAGTTTGAATCTGAACTTTTACGCATGAATCTGTATTGGATTTTCAATCATTTAGGAAGGTGGCCTAATTAGATATAATTTTTGCAGTTGTTGCAGCATTTTATGGGTGGAAATAATCATGTTCTTTGGGAAGACCTGGTATCATATCATGTCTCAGTTGTTGGCTCTCTGGCCTGAAACAATTCACTTCATATCCCCGGGCTTCAGTTTCCTCTTTTATAAAATTAGAATAGTTTCTGCCACATAATTTGTTTTAAACATTAAAGAAAAATGTGTGTGAAAATAATAATCTGAGTAAACAGAAAACCCCCAGAATGGGAGAAAATATTTGCAGACTATGCATCTGACAAAGGACTAGAAACTAGAATCTACAAGGAACTCAAACAAGTCAACAATAGAAAAAGAAATATTCTCGTTATAAAGTGCTCAAAGGACATAAACAGAGATTCCTCAAAAGAAGATATACAAATGGCCAACAACCATGAAAAAA-TGCTCGACATCACTAATGATCAGATAAATGCAAATTAAATCCAGAATAAAATAGCACCTTACTGCAAATGGCTATTATTAAAAAGTCAAGAAAAATAGATGCTGGTATGTATGTGGATAAAAGAGAATGCTTCTACACTGCTGGTGGGAATGTAAATTAATACAATTTCTATAGAAAACAGTATGGAGATTCCTTAAAGAGCTACAAGTAAATCTACCATTTGATACAGCAATCCTACTAATCACAATTGCAAAGATGTGTAATGAATCTATGTGCCAATTGACTAATGAGTGGATAAAGTAAACGTGGTATATATATA--CTATGGAATACTCCTCTGCCATAAAAAGGATCGCAGTAATGTATTTTGCAGTAACTTGGATGGAGCTGGAGTCCACTATTCTAAGTAAAATAACACAAGAGTGAAAAATAATAATA---TAAAAAGATGTTCCCAATTATAAGTGACAGATAAGCTACGATTATGCAAAGGTATACAGAGTGATATAATGGAATCTAGAGACTCAGAAGGGGGAGGGTGAGACAGGCTAGGCATAAAAGTATTACACATTGGGTACAATGTTCACTACTCGGGTGATGGGTACACTAAAAATCTCAGAATTTACTGCTATATAATTTATCCGTGCAACAGAATAAACACTTGCAGTTCAAGAAAATACTGAAATAAAAATT--AAAAAAAGAAAATGTGTGTAAAAGTACCTATTTTCATGTCTGATACCCAGTAAGCATTAAATAAATGTGAGTTCATTTCCTCTTTATTTGTACACAGAGTCATCTCCGAGGGCCTTTGGTTGGATCCTATACATTTCTTAGTTTAGAAAATCCCCTAAGAAGTGTAGTTGTAGCAGAGGACTAGAATATCTAGAGCAGTAATTTTTAAAGTGAAAGGGTAGAAAATAAGTGTTACTTGAAAAAACATATTCCTTATTATAACAAATATATTTGGAAAACAAAATTAAAAATGTCATTATTGTTTCTACAATAAAAACTGTGAAAGTACAGATATACAAAATCTTCTTAGCTGTCGGGCATTTAGTACTTGGAAAATGTCAATGTGATGGAGCAGATTTTTCTACAAGTCCAGGGTCTGGTTCCTAGGAAGGCAAGTTCACAGTAACCTTGTAGTGAAATGTTTATGTTTCTCAAAGGGAACCTTGGTTTTAAAAGATTGAGAAATGCCGACTGAGTGTCATTGTCACTGTGGAAATCAGATTTCAGAAAGTTTTATCTTTTTTCTTGCATTTTCTCATTTTTTAAAAAGGGAAATTGCTTACAAAGCATTTGTCTGTGGTCTAAAAGTTGAAGCTCTCATGATGACATTACCTGAAAGAAATATAATGCCAATTGGGAAAGGATACTCAGTTCTCTTGGAGATCTGAACTACACTTCCAGAATGTCCTCTCTAGATAGATTTCCCTATTAAGATTCCATTATTCACCACTCCATAACATTTAACTCTTCGT-AGGTATCTAACAGTCTAAATCAAATCATTGGATTACTAGGAAGGAAATTAGAAACCATCTATTCCAAGCCCTCTCCCATTATAATAGACGAGATTATTGAGACCTACAGAAATGAAATAACTCACCAAAGGCCACACCAGTCATTGGCAGAACTTGAACTATAACATAGACTTCTGACTCCTTGTGTATTAATATATCTATTTTATCACTCTACCTGTGGTGTATATGAATTGATACTAGGAGAAAACTTTCCCACAAAATACACTGATCTGAAGAATAAATAAACCTTTTTGCCAAAAGCTTTTAAAATAAATCATAGACCCCCAGGAAGCCATTGCCATGACTGTGAGAACTTTTAGAAAGTCTCATTTTACTATAAACAGCTCTGTTCTCTTTGCTTCAGCCATTACAG   [4825]
C_hamlyni_OR_1646          TTTCCTTTGCAGGGACATGGATGGAGTTGGAAGTCATTATCCTCAGCAATCTAATGCAGGAATTGAAAACCAAACACCACATGTTCTCACTTATAAATGGGAGCTGAATTATGAGAACACATGGACACATGGTGAGAAACAACAAACATTGGAGTCTGTTGGGGGCTGTTTGGTGAGAGAGAGCATCAGGAAGAATAGCTAATGGATGCTGGGCTGAATAATTAGGTGATGGGATGATCTTTTCAGCAAATGACCATGACACACATTTACCTCTGTCACAACCTTGCACATCCTGCACATGTATCCCTAAACTTAAAGTAAAAGTTGAAGAAAAAAAA--TGGAAAGAAAAACAAAGATCAAAGTATGTCTCTAAAGATATTCCTGATAATAAAAATGGCACAATGTTATGACTAAAACTTCATCATATTCCTTTTTTACCTGAAGCCCAATTCAGAGGTCAATA-----CTTCTGTCTCAATATTGCATCTCAACTCCCATTTTTTCCTTACATCAGGCAACTCTACTCTCACTCCCCTCTTCTTCAAACTCCTACTGAATTTGTAGGCTGCACTGTGAGAAGGTAAGACTACAGAGCATAGGCACATATTAACAGAGCCTTAGGCATTTTTGCTTGTGAAGTCTCTCCCATGAACCACTCTCCCAAACAACAACCATAATCTTTCTCCTTTCTGCTACTGAAGAAAATGTGGTCAAAGCAAGAATAATAAGGTTTTGGTCTAAGAAATCTGAACACCTAAGAGCTTAAAAGCAGGCAATCCAGCTTTCTATTTGAAATCCAACAGGAATCCCTTAAGCTTAATTAGGAATTTGGTCACTGAAAACTTTATTTTATGGAAATAACTAAATGTTTTCTCACAATACAAATGTGTGGCAGGTCTTTAAATGTGATTCATTGGAGCTGAGTCCAAAACCTTACTAGATACTAGTACCATCTACCCCAAAGCAGCTGCTCTTTCCAACCAACTAGCTCAGCGTTGTGGTTTTCACAAAGTTACAGCCAAAGTGAGCTTATATTATTATGGCATCAGAATTTATATTAGTTTTCTAAGTCCCAGTGAAGAAATTTCCACATCCTGTCAGTAACTAGCTAAGTGCTATTCACATGTTACCTCTAATCTTTGTAAGAATTCTGAGTTAATTATTACTATAATCCTTTACAGATTAGAAAATGGAGTCTCAGCAGGAGTAAGTGACTTTCTGCAAGTCAGAGTTATTATGATTTTAACTGTAATAAGGCTTTTCATAAGCAC-GAAAGTTGAAGTTATTTTTAACTGAATAACTTATTATATGGACAGAAACATATTTTAAAGTGGTATTTCTGTGGATAAGACTGTTCCTCGGAGATAAAAAAAA----------GCTATTGTTTTCGGTTCTAGTTCTAGCAGTTTTATGCATACGCACTACGCATATAAGGCAAATTGCCGCCCACAAGGTGTCAGGATAGGGTTATATCAAAACTAACGTTCTTTATGGAGTTGTGCTTATGAATTCAAATTATAACAAATCTGCAGATAGAAGTACTGGAAGAATTTCTTTACAACAGGAATGAACTGAGCAGGACAAGACTTGCTGTAAGATAGAGAAGACTCAAAAGCAGTAGAATTTTTAGAAAAGTGTACTGGATTTGTAGCTAAGATACTTGGATATCGGTAATATTTAAATATTATTTGTGCTGCTCTGATATGCTCTTTCCCTTCTGTGAGTTTCATTTCCTCATTATTAAAATAATATGATTTAAGCTAGATGACCTTTAACTCCCTTCTAGCTCTCATTTGGCATGATTTCATGAGCATTCCCCCTCTGAATCCTGCCCCTAACTAATACCATCACCATTGCGACTGCTGCCACTTATGCAGCTGGTACCAACTCCATAAATCTTCGCTCTCAATCTTCCCTGTCTTTTCACCACTCATCAGTAAGTCACTGGCACCACTAAGTAAACATGTTTATCAAATTTACTTCTCCATTTTATATGATGCTGAAGCCTGTCTGTGGGTTTGTCATCCTGGGAGGAGAAGAAATAATTAAACAGAAAAAAA-GTTGCTGATGGGGGCCCCTCCCACTCTCTAGAGGACAACTTTTAAATGTCATCTGGGAACTGAACTTGCTTTGCCTCATCTTACATTTTTCTTTTATTTTTAACCACTAAATTTCACATGAATTATCCAAAACAATCTGATCTCCATGACCCTGGTGTTCTTCATTCAGCCGCTTACAACCAGAACCAAAGAGTAGCAGCTAGAATTGGAAACTCTGCTGTTTCCTGAATAAATCTATATCAACTCCAAATAAGCCTGTTTGACATCCAAAACACACAAATTTGGACACATTCTGCAAGTATAGACATTTTCCTCTGTTAGGGGAAGTGAAAATTATTTTTATCCTTAAAATGAATTAAAGCAATTA-GACCGCTACCAAGCTACAACTTAAAGTTTGAATCTGAACTTTTACGCATGAATCTGTATTGGATTTTCAATCATTTAGGAAGGTGGCCTAATTAGATATAATTTTTGCAGTTGTTGCAGCATTTTATGGGTGGAAATAATCATGTTCTTTGGGAAGACCTGGTATCATATCATGTCTCAGTTGTTGGCTCTCTGGCCTGAAACAATTCACTTCATATCCCCGGGCTTCAGTTTCCTCTTTTGTAAAATTAGAATAGTTTCTGCCACATAATTTGTTTTAAACATTAAAGAAAAATGTGTGTGAAAATAATAATCTGAGTAAACAGAAAACCCCCAGAATGGGAGAAAATATTTGCAGACTATGCATCTGACAAAGGACTAGAAACTAGAATCTACAAGGAACTCAAACAAGTCAACAATAGAAAAAGAAATATTCTCGTTATAAAGTGCTCAAAGGACATAAACAGAGATTCCTCAAAAGAAGATATACAAATGGCCAACAACCATGAAAAAA-TGCTCGACATCACTAATGATCAGATAAATACAAATTAAATCCAGAATAAAATAGCACCTTACTGCAAATGGCTATTATTAAAAAGTCAAGAAAAATAGATGCTGGTATGTTTGTGGATAAAAGAGAATGCTTCTACACTGCTGGTGGGAATGTAAATTAATACAATTTCTATAGAAAACAGTATGGAGATTCCTTAAAGAGCTACAAGTAAATCTACCATTTGATACAGCAATCCTACTAATCACAATTGCAAAGATGTGTAATGAATCTATGTGCCAATTGACTAATGAGTGGATAAAGTAAACGTGGTATATATATA--CTATGGAATACTCCTCTGCCATAAAAAGGATCGCAGTAATGTATTTTGCAGTAACTTGGATGGAGCTGGAGTCCACTATTCTAAGTAAAATAACACAAGAGTGAAAAATAATAATA---TAAAAAGATGTTCCCAATTATAAGTGACAGATAAGCTACGATTATGCAAAGGTATACAGAGTGATATAATGGAATCTAGAGACTCAGAAGGGGGAGGGTGAGACAGGCTAGGCATAAAAGTATTACACATTGGGTACAATGTTCACTACTCGGGTGATGGGTACACTAAAAATCTCAGAATTTACTGCTATATAATTTATCCGTGCAACAGAATAAACACTTGCAGTTCAAGAAAATACTGAAATAAAAATT--AAAAAAAGAAAATGTGTGTAAAAGTACCTATTTTCATGTCTGATACCCAGTAAGCATTAAATAAATGTGAGTTCATTTCCTCTTTATTTGTACACAGAGTCATCTCCAAGGGCCTTTGGTTGGATCCTATACATTTCTTAATTTAGAAAATCCCCTAAGAAGTGTAGTTGTAGCAGAGGACTAGAATATCTAGAGCAGTAATTTTTAAAGTGAAAGGGTAGAAAATAAGTGTTACTTGAAAAAACATATTCCTTATTATAACAAATATATTTGAAAAACAAAATTTAAAATGTCATTATTGTTTCTACAATAAAAACTGTGAAAGTACAGATCTACAAAATCTTCTTAGCTGTCGGGCATTTAGTACTTGGAAAATGTCAATGTGATGGAGCAGATTTTTCTACAAGTCCAGGGTCTGGTTCCTAAGAAGGCAAGTTCACAGTAACCTTGTAGTGAAATGTTTATATTTCTCAAAGGGAACCTTGGTTTTAAAAGATTGAGAAATGCCGACTGAGTGTCATTGTCACTGTGGAAATCAGATTTCAGAAAGTTTTATCTTTTTTCTTGCATTTTCTCATTTTTTAAAAAGGGAAATTGCTTACAAAGCATTTGTCTGTAGTCTAAAAGTTGAAGCTCTCATGATGACATTACCTGAAAGAAATATAATGCCAATTGGGAAAGGATACTCAGTTCTCTTGGAGATCTGAACTACACTTCCAGAATGTCCTCTCTAGATAGATTTCCCTATTAAGATTCCATTATTCACCACTCCATAACATTTAACTCTTCGT-AGGTATCTAACAGTCTAAATCAAATCATTGGATTACCAGGAAGGAAATTAGAAACCATCTATTCCAAGCCCTCCTCCATTATAATAGACGAGATTATTGAGACCTACAGAAATGAAATAACTCACCAAAGGCCACACCAGTCATTGGCAGAACTTGAACTATAACATAGACTTCTGACTCCTTGTGTATTAATATATCTATTTTATCACTCTACCTGTGATGTATATGAATTGATACTAGGAGAAAACTTTCCCACAAAATATACTGATCTGAAGAATAAATAAACCTTTTTGCCAAAAGCTTTTAAAATAAATCATAGACCCCCAGGAAGCCATTGCCATGACTGTGAGAACTTTTAGAAAGTCTCATTTTACTATAAACAGCTCTGTTCTCTTTGCTTGAGCCATTACAG   [4824]
C_hamlyni_ME404            TTTCCTTTGCAGGGACATGGATGGAGTTGGAAGTCATTATCCTCAGCAATCTAATGCAGGAATTGAAAACCAAACACCACATGTTCTCACTTATAAATGGGAGCTGAATTATGAGAACACATGGACACATGGTGAGAAACAACAAACATTGGAGTCTGTTGGGGGCTGTTTGGTGAGAGAGAGCATCAGGAAGAATAGCTAATGGATGCTGGACTGAATAATTAGGTGATGGGATGATCTTTTCAGCAAACGACCATGACACACATTTACCTCTGTCACAACCTTGCACATCCTGCACATGTATCCCTAAACTTAAAGTAAAAGTTGAAGAAAAAAAA--TGGAAAGAAAAACAAAGATCAAAGTATGTCTCTAAAGATATTCCTGATAATAAAAATGGCACAATGTTATGACTAAAACTTCATCATATTCCTTTTTAACCTGAAGCCCAATTCAGAGGTCAATA-----CTTCTGTCTCAATATTGCATCTCAACTCCCATTTTTTCCTTACATCAGGCAACCCTACTCTCACTCCCCTCTTCTTCAAACTCCTACTGAATTTGTAGGCTGCACTGTGAGAAGGTAAGACTACAGAGCATAGGCACATATTAACAGAGCCTTAGGCATTTTTGCTTGTAAAGTCTCTCCCATGAACCACTCTCCCAAACAACAACCATAATCTTTCTCCTTTCTGCTACTGAAGAAAATGTGGTCAAAGCAAGAATAATAAGGTTTTGGTCTAAGAAATCTGAACACCTAAGAGCTTAAAAGCAGGCAATCCAGCTTTCTATTTGAAATCCAACAGGAATCCCTTAAGCTTAATTAGGAATTTGGTCACTGAAAACTTTATTTTATGGAAATAACTAAATGTTTTCTCACAATACAAATGTGTGGCAGGTCTTTAAATGTGATTCATTGGAGCTGAGTCCAAAACCTTACTAGATACTAGTACCATCTACCCCAAAGCAGCTGCTCTTTCCAACCAACTAGCTCAGCGTTGTGGTTTTCACAAAGTTACAGCCAAAGTGAGCTTATATTATTATGGCATCAGAATTTATATTAGTTTTCTAAGTCCCAGTGAAGAAATTTCCACATCCTGTCAGTAACTAGCTAAGTGCTATTCACATGTTACCTCTAATCTTTGTAAGAATTCTGAGTTAATTATTACTATAATCCTTTACAGATTAGAAAATGGAGTCTCAGCAGGAGTAAGTGACTTTCTGCAAGTCAGAGTTATTATGATTTTAACTGTAATAAGGCTTTTCATAAGCAC-GAAAGTTGAAGTTATTTTTAACTGAATAACTTATTATATGGACAGAAACATATTTTAAAGTGGTATTTCTGTGGATAAGACTGTTCCTCGGAGATAAAAAAAA----------GCTATTGTTTTCGGTTCTAGTTCTAGCAGTTTTATGCATACGCACTACGCATATAAGGCAAATTGCCGCCCACAAGGTGTCAGGATAGGGTTATATCAAAACTAACGTTCTTTATGGAGTTGTGCTTATGAATTCAAATTATAACAAATCTGCAGATAGAAGTACTGGAAGAATTTCTTTACAACAGGAATGAACTGAGCAGGACAAGACTTGCTGTAAGATAGAGAAGACTCAAAAGCAGTAGAATTTTTAGAAAAGTGTACTGGATTTGTAGCTAAGATACTTGGATATCGGTAATATTTAAATATTATTTGTGCTGCTCTGATATGCTCTTTCCCTTCTGTGAGTTTCATTTCCTCATTATTAAAATAATATGATTTAAACTAGATGACCTTTAACTCCCTTCTAGCTCTCATTTGGCATGATTTCATGAGCATTCCCCCTCTGAATCCTGCCCCTAACTAATACCATCACCATTGCGACTGCTGCCACTTATGCAGCTGGTACCAACTCCATAAATCTTCGCTCTCAATCTTCCCCGTCTTTTCACCACTCATCAGTAAGTCACTGGCACCACTAAGTAAACATGTTTATCAAATTTACTTCTCCATTTTATATGATGCTGAAGCCTGTCTGTGGGTTTGTCATCCTGGGAGGAGAAGAAATAATTAAACAGAAAAAAA-GTTGCTGATGGGGGCCCCTCCCACTCTCTAGAGGACAACTTTTAAATGTCATCTGGGAACTGAACTTGCTTTGCCTCATCTTACATTTTTCTTTTATTTTTAACCACTAAATTTCACATGAATTATCCAAAACAATCTGATCTCCATGACCCTGGTGTTCTTCATTCAGCCGCTTACAACCAGAACCAAAGAGTAGCAGCTAGAATTGGAAACTCTGCTGTTTCCTGAATAAATCTATATCAACTCCAAATAAGCCTGTTTGACATCCAAAACACACAAATTTGGACACATTCTGCAAGTATAGACATTTTCCTCTGTTAGGGGAAGTGAAAATTATTTTTATCCTTAAAATGAATTAAAGCAATTA-GACCGCTACCAAGCAACAACTTAAAGTTTGAATCTGAACTTTTACGCGTGAATCTGTATTGGATTTTCAATCATTTAGGAAGGTGGCCTAATTAGATATAATTTTTGCAGTTGTTGCAGCATTTTATGGGTGGAAATAATCATGTTCTTTGGGAAGACCTGGTATCATATCATGTCTCAGTTGTTGGCTCTCTGGCCTGAAACAATTCACTTCATATCCCCGGGCTTCAGTTTCCTCTTTTGTAAAATTAGAATAGTTTCTGCCACATAATTTGTTTTAAACATTAAAGAAAAATGTGTGTGAAAATAATAATCTGAGTAAACAGAAAACCCCCAGAATGGGAGAAAATATTTGCAGACTATGCATCTGACAAAGGACTAGAAACTAGAATCTACAAGGAACTCAAACAAGTCAACAATAGAAAAAGAAATATTCTCGTTATAAAGTGCTCAAAGGACATAAACAGAGATTCCTCAAAAGAAGATATACAAATGGCCAACAACCATGAAAAAA-TGTTCGACATCACTAATGATCAGATAAATGCAAATTAAATCCAGAATAAAATAGCACCTTACTGCAAATGGCTATTATTAAAAAGTCAAGAAAAATAGATGCTGGTATGTTTGTGGATAAAAGAGAATGCTTCTACACTGCTGGTGGGAATGTAAATTAATACAATTTCTATAGAAAACAGTATGGAGCTTCCTTAAAGAGCTACAAGTAAATCTACCATTTGATACAGCAATCCTACTAATCACAATTGCAAAGATGTGTAATGAATCTATATGCCAATTGACTAATGAGTGGATAAAGTAAACGTGGTATATATATATACTATGGAATACTCCTCTGCCATAAAAAGGATCGCAGTAATGTATTTTGCAGTAACTTGGATGGAGCTGGAGTCCACTATTCTAAGTAAAATAACACAAGAGTGAAAAATAATAATA---TAAAAAGATGTTCCCAATTATAAGTGACAGATAAGCTACGATTATGCAAAGGTATACAGAGTGATATAATGGAATCTAGAGACTCAGAAGGGGGAGGGTGAGACAGGCTAGGCATAAAAGTATTACACATTGGGTACAATGTTCACTACTCGGGTGATGGGTACACTAAAAGTCTCAGAATTTACTGCTATATAATTTATCCGTGCAACAGAATAAACACTTGCAGTTCAAGAAAATACTGAAATAAAAATT--AAAAAAAGAAAATGTGTGTAAAAGTACCTATTTTCATGTCTGATACCCAGTAAGCATTAAATAAATGTGAGTTCATTTCCTCTTTATTTGTACACAGAGTCATCTCCAAGGGCCTTTGGTTGGATCCTATACATTTCTTAATTTAGAAAATCCCCTAAGAAGTGTAGTTGTAGCAGAGGACTAGAATATCTAGAGCAGTAATTTTTAAAGTGAAAGGGTAGAAAATAAGTGTTACTTGAAAAAACATATTCCTTATTATAACAAATATATTTGGAAAACAAAATTTAAAATGTCATTATTGTTTCTACAATAAAAACTGTGAAAGTACAGATCTACAAAATCTTCTTAGCTGTCGGGCATTTAGTACTTGGAAAATGTCAATGTGATGGAGCAGATTTTTCTACAAGTCCAGGGTCTGGTTCCTAAGAAGGCAAGTTCACAGTAACCTTGTAGTGAAATGTTTATGTTTCTCAAAGGGAACCTTGGTTTTAAAAGATTGAGAAATGCCGACTGAGTGTCATTGTCACTGTGGAAATCAGATTTCAGAAAGTTTTATCTTTTTTCTTGCATTTTCTCATTTTTTAAAAAGGGAAATTGTTTACAAAGCATTTGTCTGTAGTCTAAAAGTTGAAGCTCTCATGATGACATTACCTGAAAGAAATATAATGCCAATTGGGAAAGGATACTCAGTTCTCTTGGAGATCTGAACTACACTTCCAGAATGTCCTCTCTAGATAGATTTCCCTATTAAGATTCCATTATTCACCACTCCATAACATTTAACTCTTCGT-AGGTATCTAACAGTCTAAATCAAATCATTGGATTACCAGGAAGGAAATTAGAAACCATCTATTCCAAGCCCTCCTCCATTATAATAGACGAGATTATTGAGACCTACAGAAATGAAATAACTCACCAAAGGCCACACCAGTCATTGGCAGAACTTGAACTATAACATAGACTTCTGACTCCTTGTGTATTAATATATCTATTTTATCACTCTACCTGTGATGTATATGAATTGATACTAGGAGAAAACTTTCCCACAAAATATACTGATCTGAAGAATAAATAAACCTTTTTGCCAAAAGCTTTTAAAATAAATCATAGACCCCCAGGAAGCCATTGCCATGACTGTGAGAACTTTTAGAAAGTCTCATTTTACTATAAACAGCTCTGTTCTCTTTGC??????????????   [4826]
C_lomamiensis_ME408        TTTCCTTTGCAGGGACATGGATGGAGTTGGAAGTCATTATCCTCAGCAATCTAATGCAGGAATTGAAAACCAAACACCACATGTTCTCACTTATAAATGGGAGCTGAATTATGAGAACACATGGACACATGGTGAAAAACAACAAACATTGGAGTCTGTTGGGGGCTGTTTGGTGAGAGAGAGCATCAGGAAGAATAGCTAATGGATGCTGGGCTGAATAATTAGGTGATGGGATGATCTTTTCAGCAAATGACCATGACACACATTTACCTCTGTCACAACCTTGCACATCCTGCACATGTATCCCTAAACTTAAAGTAAAAGTTGAAGAAAAAAAA--TGGAAAGAAAAACAAAGATCAAAGTATGTCTCTAAAGATATTCCTGATAATAAAAATGGCACAATGTTATGACTAAAACTTCATCATATTCCTTTTTTACCTGAAGCCCAATTCAGAGGTCAATA-----CTTCTGTCTCAATATTGCATCTCAACTCCCATTTTTTCCTTACATCAGGCAACCCTACTCTCACTCCCCTCTTCTTCAAACTGCTACTGAATTTGTAGGCTGCACTGTGAGAAGGTAAGACTACAGAGCATAGGCACATATTAACAGAGCCTTAGGCATTTTTGCTTGTAAAGTCTCTCCCATGAACCACTCTCCCAAACAACAACCATAATCTTTCTCCTTTCTGCTACTGAAGAAAATGTGGTCAAAGCAAGAATAATAAGGTTTTGGTCTAAGAAATCTGAACACCTAAGAGCTTAAAAGCAGGCAATCCAGCTTTCTATTTGAAATCCAACAGGAATCCCTTAAGCTTAATTAGGAATTTGGTCACTGAAAACTTTATTTTATGGAAATAACTAAATGTTTTCTCACAATACAAATGTGTGGCAGGTCTTTAAATGTGATTCATTGGAGCTGAGTCCAAAACCTTACTAGATACTAGTACCATCTACCCCAAAGCAGCTGCTCTTTCCAACCAACTAGCTCAGCGTTGTGGTTTTCACAAAGTTACAGCCAAAGTGAGCTTATATTATTATGGCATCAGAATTTATATTAGTTTTCTAAGTCCCAGTGAAGAAATTTCCACATCCTGTCAGTAACTAGCTAAGTGCTATTCACATGTTACCTCTAATCTTTGTAAGAATTCTGAGTTAATTATTACTATAATCCTTTACAGATTAGAAAATGGAGTCTCAGCAGGAGTAAGTGACTTTCTGCAAGTCAGAGTTATTATGATTTTAACTGTAATAAGGCTTTTCATAAGCAC-GAAAGTTGAAGTTATTTTTAACTGAATAACTTATTATATGGACAGAAACATATTTTAAAGTGGTATTTCTGTGGATAAGACTGTTCCTCGGAGATAAAAAAAAA---------GCTATTGTTTTCGGTTCTAGTTCTAGCAGTTTCATGCATACGCACTACGCATATAAGGCAAATTGCCGCCCACAAGGTGTCAGGATAGGGTTATATCAAAACTAACGTTCTTTATGGAGTTGTGCTTATGAATTCAAATTATAACAAATCTGCAGATAGAAGTACTGGAAGAATTTCTTTACAACAGGAATGAACTGAGCAGGACAAGACTTGCTGTAAGATAGAGAAGACTCAAAAGCAGTAGAATTTTTAGAAAAGTGTACTGGATTTGTAGCTAAGATACTTGGATATCGGTAATATTTAAATATTATTTGTGCTGCTCTGATATGCTCTTTCCCTTCTGTGAGTTTCATTTCCTCATTATTAAAATAATATGATTTAAACTAGATGACCTTTAACTCCCTTCTAGCTCTCATTTGGCATGATTTCATGAGCATTCCCCCTCTGAATCCTGCCCCTAACTAATACCATCACCATTGCGACTGCTGCCACTTATGCAGCTGGTACCAACTCCATAAATCTTCGCTCTCAATCTTCCCTGTCTTTTCACCACTCATCAGTAAGTCACTGGCACCACTAAGTAAACATGTTTATCAAATTTACTTCTCCATTTTATATGATGCTGAAGCCTGTCTGTGGGTTTGTCATCCTGGGAGGAGAAGAAATAATTAAACAGAAAAAAA-GTTGCTGATGGGGGCCCCTCCCACTCTCTAGAGGACAACTTTTAAATGTCATCTGGGAACTGAACTTGCTTTGCCTCATCTTACATTTTTCTTTTATTTTTAACCACTAAATTTCACATGAATTATCCAAAACAATCTGATCTCCATGACCCTGGTGTTCTTCATTCAGCCGCTTACAACCAGAACCAAAGAGTAGCAGCTAGAATTGGAAACTCTGCTGTTTCCTGAATAAATCTATATCAACTCCAAATAAGCCTGTTTGACATCCAAAACACACAAATTTGGACACATTCTGCAAGTATAGACATTTTCCTCTGTTAGGGGAAGTGAAAATTATTTTTATCCTTAAAATGAATTAAAGCAATTA-GACCGCTACCAAGCAACAACTTAAAGTTTGAATCTGAACTTTTACGCATGAATCTGTATTGGATTTTCAATCATTTAGGAAGGTGGCCTAATTAGATATAATTTTTGCAGTTGTTGCAGCATTTTATGGGTGGAAATAATCATGTTCTTTGGGAAGACCTGGTATCATATCATGTCTCAGTTGTTGGCTCTCTGGCCTGAAACAATTCACTTCATATCCCCGGGCTTCAGTTTCCTCTTTTGTAAAATTAGAATAGTTTCTGCCACATAATTTGCTTTAAACATTAAAGAAAAATGTGTGTGAAAATAATAATCTGAGTAAACAGAAAACCCCCAGAATGGGAGAAAATATTTGCAGACTATGCATCTGACAAAGGACTAGAAACTAGAATCTACAAGGAACTCAAACAAGTCAACAATAGAAAAAGAAATATTCTCGTTATAAAGTGCTCAAAGGACATAAACAGAGATTCCTCAAAAGAAGATATACAAATGGCCAACAACCATGAAAAAA-TGCTCGACATCACTAATGATCAGATAAATGCAAATTAAATCCAGAATAAAATAGCACCTTACTGCAAATGGCTATTATTAAAAAGTCAAGAAAAATAGATGCTGGTATGTTTGTGGATAAAAGAGAATGCTTCTACACTGCTGGTGGGAATGTAAATTAATACAATTTCTATAGAAAACAGTATGGAGATTCCTTAAAGAGCTACAAGTAAATCTACCATTTGATACAGCAATCCTACTAATCACAATTGCAAAGATGTGTAATGAATCTATGTGCCAATTGACTAATGAGTGGATAAAGTAAACGTGGTATATATATA--CTATGGAATACTCCTCTGCCATAAAAAGGATCGCAGTAATGTATTTTGCAGTAACTTGGATGGAGCTGGAGTCCACTATTCTAAGTAAAATAACACAAGAGTGAAAAATAATAATA---TAAAAAGATGTTCCCAATTATAAGTGACAGATAAGCTACGATTATGCAAAGGTATACAGAGTGATATAATGGAATCTAGAGACTCAGAAGGGGGAGGGTGAGACAGGCTAGGCATAAAAGTATTACACATTGGGTACAATGTTCACTACTCGGGTGATGGGTACACTAAAAATCTCAGAATTTACTGCTATATAATTTATCCGTGCAACAGAATAAACACTTGCAGTTCAAGAAAATACTGAAATAAAAATT--AAAAAAAGAAAATGTGTGTAAAAGTACCTATTTTCATGTCTGATACCCAGTAAGCATTAAATAAATGTGAGTTCATTTCCTCTTTATTTGTACACAGAGTCATCTCCAAGGGCCTTTGGTTGGATCCTATACATTTCTTAATTTAGAAAATCCCCTAAGAAGTGTAGTTGTAGCAGAGGACTAGAATATCTAGAGCAGTAATTTTTAAAGTGAAAGGGTAGAAAATAAGTGTTACTTGAAAAAACATATTCCTTATTATAACAAATATATTTGGAAAACAAAATTTAAAATGTCATTATTGTTGCTACAATAAAAACTGTGAAAGTACAGATCTACAAAATCTTCTTAGCTGTCGGGCATTTAGTACTTGGAAAATGTCAATGTGATGGAGCAGATTTTTCTACAAGTCCAGGGTCTGGTTCCTAAGAAGGCAAGTTCACAGTAACCTTGTAGTGAAATGTTTATGTTTCTCAAAGGGAACCTTGGTTTTAAAAGATTGAGAAATGCCGACTGAGTGTCATTGTCACTGTGGAAATCAGATTTCAGAAAGTTTTATCTTTTTTCTTGCATTTTCTCATTTTTTAAAAAGGGAAATTGCTTACAAAGCATTTGTCTGTAGTCTAAAAGTTGAAGCTCTCATGATGACATTACCTGAAAGAAATATAATGCCAATTGGGAAAGGATACTCAGTTCTCTTGGAGATCTGAACTACACTTCCAGAATGTCCTCTCTAGATAGATTTCCCTATTAAGATTCCATTATTCACCACTCCATAACATTTAACTCTTCGT-AGGTATCTAACAGTC-AAATCAAATCATTGGATTACTAGGAAGGAAATTAGAAACCATCTATTCCAAGCCCTCTCCCATTATAATAGACGAGATTATTGAGACCTACAGAAATGAAATAACTCACCAAAGGCCACACCAGTCATTGGCAGAACTTGAACTATAACATAGACTTCTGACTCCTTGTGTATTAATATATCTATTTTATCACTCTACCTGTGATGTATATGAATTGATACTAGGAGAAAACTTTCCCACAAAATATACTGATCTGAAGA????????????????????????????????????????????????????????????????????????????????????????????????????????????????????????????????????????   [4824]
C_lomamiensis_JH005        ?????????????????????????????????????????????????????????????????AAAACCAAACACCACATGTTCTCACTTATAAATGGGAGCTGAATTATGAGAACACATGGACACATGGTGAGAAACAACAAACATTGGAGTCTGTTGGGGGCTGTTTGGTGAGAGAGAGCATCAGGAAGAATAGCTAATGGATGCTGGGCTGAATAATTAGGTGATGGGATGATCTTTTCAGCAAATGACCATGACACACATTTACCTCTGTCACAACCTTGCACATCCTGCACATGTATCCCTAAACTTAAAGTAAAAGTTGAAGAAAAAAAA--TGGAAAGAAAAACAAAGATCAAAGTATGTCTCTAAAGATATTCCTGATAATAAAAATGGCACAATGTTATGACTAAAACTTCATCATATTCCTTTTTTACCTGAAGCCCAATTCAGAGGTCAATA-----CTTCTGTCTCAATATTGCATCTCAACTCCCATTTTTTCCTTACATCAGGCAACCCTACTCTCACTCCCCTCTTCTTCAAACTCCTACTGAATTTGTAGGCTGCACTGTGAGAAGGTAAGACTACAGAGCATAGGCACATATTAACAGAGCCTTAGGCATTTTTGCTTGTAAAGTCTCTCCCATGAACCACTCTCCCAAACAACAACCATAATCTTTCTCCTTTCTGCTACTGAAGAAAATGTGGTCAAAGCAAGAATAATAAGGTTTTGGTCTAAGAAATCTGAACACCTAAGAGCTTAAAAGCAGGCAATCCAGCTTTCTATTTGAAATCCAACAGGAATCCCTTAAGCTTAATTAGGAATTTGGTCACTGAAAACTTTATTTTATGGAAATAACTAAATGTTTTCTCACAATACAAATGTGTGGCAGGTCTTTAAATGTGATTCATTGGAGCTGAGTCCAAAACCTTACTAGATACTAGTACCATCTACCCCAAAGCAGCTGCTTTTTCCAACCAACTAGCTCAGCGTTGTGGTTTTCACAAAGTTACAGCCAAAGTGAGCTTATATTATTATGGCATCAGAATTTATATTAGTTTTCTAAGTCCCAGTGAAGAAATTTCCACATCCTGTCAGTAACTAGCTAAGTGCTATTCACATGTTACCTCTAATCTTTGTAAGAATTCTGAGTTAATTATTACTATAATCCTTTACAGATTAGAAAATGGAGTCTCAGCAGGAGTAAGTGACTTTCTGCAAGTCAGAGTTATTATGATTTTAACTGTAATAAGGCTTTTCATAAGCAC-GAAAGTTGAAGTTATTTTTAACTGAATAACTTATTATATGGACAGAAACATATTTTAAAGTGGTATTTCTGTGGATAAGACTGTTCCTCGGAGATAAAAAAAAA---------GCTATTGTTTTCGGTTCTAGTTCTAGCAGTTTTATGCATACGCACTACGCATATAAGGCAAATTGCCGCCCACAAGGTGTCAGGATAGGGTTATATCAAAACTAACGTTCTTTATGGAGTTGTGCTTATGAATTCAAATTATAACAAATCTGCAGATAGAAGTACTGGAAGAATTTCTTTACAACAGGAATGAACTGAGCAGGACAAGACTTGCTGTAAGATAGAGAAGACTCAAAAGCAGT?????????????????????????TTTGTAGCTAAGATACTTGGATATCGGTAATATTTAAATATTATTTGTGCTGCTCTGATATGCTCTTTCCCTTCTGTGAGTTTCATTTCCTCATTATTAAAATAATATGATTTAAACTAGATGACCTTTAACTCCCTTCTAGCTCTCATTTGGCATGATTTCATGAGCATTCCCCCTCTGAATCCTGCCCCTAACTAATACCATCACCATTGCGACTGCTGCCACTTATGCAGCTGGTACCAACTCCATAAATCTTTGCTCTCAATCTTCCCCGTCTTTTCACCACTCATCAGTAAGTCACTGGCACCACTAAGTAAACATGTTTATCAAATTTACTTCTCCATTTTATATGATGCTGAAGCCTGTCTGTGGGTTTGTCATCCTGGGAGGAGAAGAAATAATTAAACAGAAAAAAA-GTTGCTGATGGGGGCCCCTCCCACTCTCTAGAGGACAACTTTTAAATGTCATCTGGGAACTGAACTTGCTTTGCCTCATCTTACATTTTTCTTTTATTTTTAACCACTAAATTTCACATGAATTATCCAAAACAATCTGATCTCCATGACCCTGGTGTTCTTCATTCAGCCGCTTACAACCAGAACCAAAGAGTAGCAGCTAGAATTGGAAACTCTGCTGTTTCCTGAATAAATCTATATCAACTCCAAATAAGCCTGTTTGACATCCAAAACACACAAATTTGGACACATTCTGCAAGTATAGACATTTTCCTCTGTTAGGGGAAGTGAAAATTATTTTTATCCTTAAAATGAATTAAAGCAATTA-GACCGCTACCAAGCAACAACTTAAAGTTTGAATCTGAACTTTTACGCATGAATCTGTATTGGATTTTCAATCATTTAGGAAGGTGGCCTAATTAGATATAATTTTTGCAGTTGTTGCAGCATTTTATGGGTGGAAATAATCATGTTCTTTGGAAAGACCTGGTATCATATCATGTCTCAGTTGTTGGCTCTCTGGCCTGAAACAATTCACTTCATATCCCCGGGCTTCAGTTTCCTCTTTTGTAAAATTAGAATAGTTTCTGCCACATAATTTGTTTTAAACATTAAAGAAAAATGTGTGTGAAAATAATAATCTGAGTAAACAGAAAACCCCCAGAATGGGAGAAAATATTTGCAGACTATGCATCTGACAAAGGACTAGAAACTAGAATCTACAAGGAACTCAAACAAGTCAACAATAGAAAAAGAAATATTCTCGTTATAAAGTGCTCAAAGGACATAAACAGAGATTCCTCAAAAGAAGATATACAAATGGCCAACAACCATGAAAAAA-TGCTCGACATCACTAATGATCAGATAAATGCAAATTAAATCCAGAATAAAATAGCACCTTACTGCAAATGGCTATTATTAAAAAGTCAAGAAAAATAGATGCTGGTATGTTTGTGGATAAAAGAGAATGCTTCTACACTGCTGGTGGGAATGTAAATTAATACAATTTCTATAGAAAACAGTATGGAGATTCCTTAAAGAGCTACAAGTAAATCTACCATTTGATACAGCAATCCTACTAATCACAATTGCAAAGATGTGTAATGAATCTATGTGCCAATTGACTAATGAGTGGATAAAGTAAACGTGGTATATATATA--CTATGGAATACTCCTCTGCCATAAAAAGGATCGCAGTAATGTATTTTGCAGTAACTTGGATGGAGCTGGAGTCCACTATTCTAAGTAAAATAACACAAGAGTGAAAAATAATAATA---TAAAAAGATGTTCCCAATTATAAGTGACAGATAAGCTACGATTATGCAAAGGTATACAGAGTGATATAATGGAATCTAGAGACTCAGAAGGGGGAGGGTGAGACAGGCTAGGCATAAAAGTATTACACATTGGGTACAATGTTCACTACTCGGGTGATGGGTACACTAAAAATCTCAGAATTTACTGCTATATAATTTATCCGTGCAACAGAATAAACACTTGCAGTTCAAGAAAATACTGAAATAAAAATT--AAAAAAAGAAAATGTGTGTAAAAGTACCTATTTTCATGTCTGATACCCAGTAAGCATTAAATAAATGTGAGTTCATTTCCTCTTTATTTGTACACAGAGTCATCTCCAAGGGCCTTTGGTTGGATCCTATACATTTCTTAATTTAGAAAATCCCCTAAGAAGTGTAGTTGTAGCAGAGGACTAGAATATCTAGAGCAGTAATTTTTAAAGTGAAAGGGTAGAAAATAAGTGTTACTTGAAAAAACATATTCCTTATTATAACAAATATATTTGGAAAACAAAATTTAAAATGTCATTATTGTTGCTACAATAAAAACTGTGAAAGTACAGATCTACAAAATCTTCTTAGCTGTCGGGCATTTAGTACTTGGAAAATGTCAATGTGATGGAGCAGATTTTTCTACAAGTCCAGGGTCTGGTTCCTAAGAAGGCAAGTTCACAGTAACCTTGTAGTGAAATGTTTATGTTTCTCAAAGGGAACCTTGGTTTTAAAAGATTGAGAAATGCCGACTGAGTGTCATTGTCACTGTGGAAATCAGATTTCAGAAAGTTTTATCTTTTTTCTTGCATTTTCTCATTTTTTAAAAAGGGAAATTGCTTACAAAGCATTTGTCTGTAGTCTAAAAGTTGAAGCTCTCATGATGACATTACCTGAAAGAAATATAATGCCAATTGGGAAAGGATACTCAGTTCTCTTGGAGATCTGAACTACACTTCCAGAATGTCCTCTCTAGATAGATTTCCCTATTAAGATTCCATTATTCACCACTCCATAACATTTAACTCTTCGT-AGGTATCTAACAGTCTAAATCAAATCATTGGATTACTAGGAAGGAAATTAGAAACCATCTATTCCAAGCCCTCTCCCATTATAATAGACGAGATTATTGAGACCTACAGAAATGAAATAACTCACCAAAGGCCACACCAGTCATTGGCAGAACTTGAACTATAGCATAGACTTCTGACTCCTTGTGTATTAATATATCTATTTTATCACTCTACCTGTGATGTATATGAATTGATACTAGGAGAAAACTTTCCCACAAAATATACTGATCTGAAGAATAAATAAACCTTTTTGCCAAAAGCTTTTAAAATAAATCATAGACCCCCAGGAAGCCATTGCCATGACTGTGAGAACTTTTAGAAAGTCTCATTTTACTATAAACAGCTCTGTTCTCTTTGCTTGAGCCATTACAG   [4825]
C_lomamiensis_GP600        TTTCCTTTGCAGGGACATGGATGGAGTTGGAAGTCATTATCCTCAGCAATCTAATGCAGGAATTGAAAACCAAACACCACATGTTCTCACTTATAAATGGGAGCTGAATTATGAGAACACATGGACACATGGTGAGAAACAACAAACATTGGAGTCTGTTGGGGGCTGTTTGGTGAGAGAGAGCATCAGGAAGAATAGCTAATGGATGCTGGGCTGAATAATTAGGTGATGGGATGATCTTTTCAGCAAATGACCATGACACACATTTACCTCTGTCACAACCTTGCACATCCTGCACATGTATCCCTAAACTTAAAGTAAAAGTTGAAGAAAAAAAA--TGGAAAGAAAAACAAAGATCAAAGTATGTCTCTAAAGATATTCCTGATAATAAAAATGGCACAATGTTATGACTAAAACTTCATCATATTCCTTTTTTACCTGAAGCCCAATTCAGAGGTCAATA-----CTTCTGTCTCAATATTGCATCTCAACTCCCATTTTTTCCTTACATCAGGCAACCCTACTCTCACTCCCCTCTTCTTCAAACTCCTACTGAATTTGTAGGCTGCACTGTGAGAAGGTAAGACTACAGAGCATAGGCACATATTAACAGAGCCTTAGGCATTTTTGCTTGTAAAGTCTCTCCCATGAACCACTCTCCCAAACAACAACCATAATCTTTCTCCTTTCTGCTACTGAAGAAAATGTGGTCAAAGCAAGAATAATAAGGTTTTGGTCTAAGAAATCTGAACACCTAAGAGCTTAAAAGCAGGCAATCCAGCTTTCTATTTGAAATCCAACAGGAATCCCTTAAGCTTAATTAGGAATTTGGTCACTGAAAACTTTATTTTATGGAAATAACTAAATGTTTTCTCACAATACAAATGTGTGGCAGGTCTTTAAATGTGATTCATTGGAGCTGAGTCCAAAACCTTACTAGATACTAGTACCATCTACCCCAAAGCAGCTGCTCTTTCCAACCAACTAGCTCAGCGTTGTGGTTTTCACAAAGTTACAGCCAAAGTGAGCTTATATTATTATGGCATCAGAATTTATATTAGTTTTCTAAGTCCCAGTGAAGAAATTTCCACATCCTGTCAGTAACTAGCTAAGTGCTATTCACATGTTACCTCTAATCTTTGTAAGAATTCTGAGTTAATTATTACTATAATCCTTTACAGATTAGAAAATGGAGTCTCAGCAGGAGTAAGTGACTTTCTGCAAGTCAGAGTTATTATGATTTTAACTGTAATAAGGCTTTTCATAAGCAC-GAAAGTTGAAGTTATTTTTAACTGAATAACTTATTATATGGACAGAAACATATTTTAAAGTGGTATTTCTGTGGATAAGACTGTTCCTCGGAGATAAAAAAAAA---------GCTATTGTTTTCGGTTCTAGTTCTAGCAGTTTCATGCATACGCACTACGCATATAAGGCAAATTGCCGCCCACAAGGTGTCAGGATAGGGTTATATCAAAACTAACGTTCTTTATGGAGTTGTGCTTATGAATTCAAATTATAACAAATCTGCAGATAGAAGTACTGGAAGAATTTCTTTACAACAGGAATGAACTGAGCAGGACAAGACTTGCTGTAAGATAGAGAAGACTCAAAAGCAGTAGAATTTTTAGAAAAGTGTACTGGATTTGTAGCTAAGATACTTGGATATCGGTAATATTTAAATATTATTTGTGTTGCTCTGATATGCTCTTTCCCTTCTGTGAGTTTCATTTCCTCATTATTAAAATAATATGATTTAAACTAGATGACCTTTAACTCCCTTCTAGCTCTCATTTGGCATGATTTCATGAGCATTCCCCCTCTGAATCCTGCCCCTAACTAATACCATCACCATTGCGACTGCTGCCACGTATGCAGCTGGTACCAACTCCATAAATCTTCGCTCTCAATCTTCCCTGTCTTTTCACCACTCATCAGTAAGTCACTGGCACCACTAAGTAAACATGTTTATCAAATTTACTTCTCCATTTTATATGATGCTGAAGCCTGTCTGTGGGTTTGTCATCCTGGGAGGAGAAGAAATAATTAAACAGAAAAAA--GTTGCTGATGGGGGCCCCTCCCACTCTCTAGAGGACAACTTTTAAATGTCATCTGGGAACTGAACTTGCTTTGCCTCATCTTACATTTTTCTTTTATTTTTAACCACTAAATTTCACATGAATTATCCAAAACAATCTGATCTCCATGACCCTGGTGTTCTTCATTCAGCCGCTTACAACCAGAACCAAAGAGTAGCAGCTAGAATTGGAAACTCTGCTGTTTCCTGAATAAATCTATATCAACTCCAAATAAGCCTGTTTGACATCCAAAACACACAAATTTGGACACATTCTGCAAGTATAGACATTTTCCTCTGTTAGGGGAAGTGAAAATTATTTTTATCCTTAAAATGAATTAAAGCAATTA-GACCGCTACCAAGCAACAACTTAAAGTTTGAATCTGAACTTTTACGCATGAATCTGTATTGGATTTTCAATCATTTAGGAAGGTGGCCTAATTAGATATAATTTTTGCAGTTGTTGCAGCATTTTATGGGTGGAAATAATCATGTTCTTTGGGAAGACCTGGTATCATATCATGTCTCAGTTGTTGGCTCTCTGGCCTGAAACAATTCACTTCATATCCCCGGGCTTCAGTTTCCTCTTTTGTAAAATTAGAATAGTTTCTGCCACATAATTTGTTTTAAACATTAAAGAAAAATGTGTGTGAAAATAATAATCTGAGTAAACAGAAAACCCCCAGAATGGGAGAAAATATTTGCAGACTATGCATCTGACAAAGGACTAGAAACTAGAATCTACAAGGAACTCAAACAAGTCAACAATAGAAAAAGAAATATTCTCGTTATAAAGTGCTCAAAGGACATAAACAGAGATTCCTCAAAAGAAGATATACAAATGGCCAACAACCATGAAAAAA-TGCTCGACATCACTAATGATCAGATAAATGCAAATTAAATCCAGAATAAAATAGCACCTTACTGCAAATGGCTATTATTAAAAAGTCAAGAAAAATAGATGCTGGTATGTTTGTGGATAAAAGAGAATGCTTCTACACTGCTGGTGGGAATGTAAATTAATACAATTTCTATAGAAAACAGTATGGAGATTCCTTAAAGAGCTACAAGTAAATCTACCATTTGATACAGCAATCCTACTAATCACAATTGCAAAGATGTGTAATGAATCTATGTGCCAATTGACTAATGAGTGGATAAAGTAAACGTGGTATATATATA--CTATGGAATACTCCTCTGCCATAAAAAGGATCGCAGTAATGTATTTTGCAGTAACTTGGATGGAGCTGGAGTCCACTATTCTAAGTAAAATAACACAAGAGTGAAAAATAATAATA---TAAAAAGATGTTCCCAAATATAAGTGACAGATAAGCTACGATTATGCAAAGGTATACAGAGTGATATAATGGAATCTAGAGACTCAGAAGGGGGAGGGTGAGACAGGCTAGGCATAAAAGTATTACACATTGGGTACAATGTTCACTACTCGGGTGATGGGTACACTAAAAATCTCAGAATTTACTGCTATATAATTTATCCGTGCAACAGAATAAACACTTGCAGTTCAAGAAAATACTGAAATAAAAATT--AAAAAAAGAAAATGTGTGTAAAAGTACCTATTTTCATGTCTGATACCCAGTAAGCATTAAATAAATGTGAGTTCATTTCCTCTTTATTTGTACACAGAGTCATCTCCAAGGGCCTTTGGTTGGATCCTATACATTTCTTAATTTAGAAAATCCCCTAAGAAGTGTAGTTGTAGCAGAGGACTAGAATATCTAGAGCAGTAATTTTTAAAGTGAAAGGGTAGAAAATAAGTGTTACTTGAAAAAACATATTCCTTATTATAACAAATATATTTGGAAAACAAAATTTAAAATGTCATTATTGTTGCTACAATAAAAACTGTGAAAGTACAGATCTACAAAATCTTCTTAGCTGTCGGGCATTTAGTACTTGGAAAATGTCAATGTGATGGAGCAGATTTTTCTACAAGTCCAGGGTCTGGTTCCTAAGAAGGCAAGTTCACAGTAACCTTGTAGTGAAATGTTTATGTTTCTCAAAGGGAACCTTGGTTTTAAAAGATTGAGAAATGCCGACTGAGTGTCATTGTCACTGTGGAAATCAGATTTCAGAAAGTTTTATCTTTTTTCTTGCATTTTCTCATTTTTTAAAAAGGGAAATTGCTTACAAAGCATTTGTCTGTAGTCTAAAAGTTGAAGCTCTCATGATGACATTACCTGAAAGAAATATAATGCCAATTGGGAAAGGATACTCAGTTCTCTTGGAGATCTGAACTACACTTCCAGAATGTCCTCTCTAGATAGATTTCCCTATTAAGATTCCATTATTCACCACTCCATAACATTTAACTCTTCGT-AGGTATCTAACAGTC-AAATCAAATCATTGGATTACTAGGAAGGAAATTAGAAACCATCTATTCCAAGCCCTCTCCCATTATAATAGACGAGATTATTGAGACCTACAGAAATGAAATAACTCACCAAAGGCCACACCAGTCATTGGCAGAACTTGAACTATAACATAGACTTCTGAATCCTTGTGTATTAATATATCTATTTTATCACTCTACCTGTGATGTATATGAATTGATACTAGGAGAAAACTTTCCCACAAAATATACTGATCTGAAGAATAAATAAACCTTTTTG???????????????????????????????????????????????????????????????????????????????????????????????????????????????????????   [4823]
C_lomamiensis_GP609        TTTCCTTTGCAGGGACATGGATGGAGTTGGAAGTCATTATCCTCAGCAATCTAATGCAGGAATTGAAAACCAAACACCACATGTTCTCACTTATAAATGGGAGCTGAATTATGAGAACACATGGACACATGGTGAAAAACAACAAACATTGGAGTCTGTTGGGGGCTGTTTGGTGAGAGAGAGCATCAGGAAGAATAGCTAATGGATGCTGGGCTGAATAATTAGGTGATGGGATGATCTTTTCAGCAAATGACCATGACACACATTTACCTCTGTCACAACCTTGCACATCCTGCACATGTATCCCTAAACTTAAAGTAAAAGTTGAAGAAAAAAAA--TGGAAAGAAAAACAAAGATCAAAGTATGTCTCTAAAGATATTCCTGATAATAAAAATGGCACAATGTTATGACTAAAACTTCATCATATTCCTTTTTTACCTGAAGCCCAATTCAGAGGTCAATA-----CTTCTGTCTCAATATTGCATCTCAACTCCCATTTTTTCCTTACATCAGGCAACCCTACTCTCACTCCCCTCTTCTTCAAACTGCTACTGAATTTGTAGGCTGCACTGTGAGAAGGTAAGACTACAGAGCATAGGCACATATTAACAGAGCCTTAGGCATTTTTGCTTGTAAAGTCTCTCCCATGAACCACTCTCCCAAACAACAACCATAATCTTTCTCCTTTCTGCTACTGAAGAAAATGTGGTCAAAGCAAGAATAATAAGGTTTTGGTCTAAGAAATCTGAACACCTAAGAGCTTAAAAGCAGGCAATCCAGCTTTCTATTTGAAATCCAACAGGAATCCCTTAAGCTTAATTAGGAATTTGGTCACTGAAAACTTTATTTTATGGAAATAACTAAATGTTTTCTCACAATACAAATGTGTGGCAGGTCTTTAAATGTGATTCATTGGAGCTGAGTCCAAAACCTTACTAGATACTAGTACCATCTACCCCAAAGCAGCTGCTCTTTCCAACCAACTAGCTCAGCGTTGTGGTTTTCACAAAGTTACAGCCAAAGTGAGCTTATATTATTATGGCATCAGAATTTATATTAGTTTTCTAAGTCCCAGTGAAGAAATTTCCACATCCTGTCAGTAACTAGCTAAGTGCTATTCACATGTTACCTCTAATCTTTGTAAGAATTCTGAGTTAATTATTACTATAATCCTTTACAGATTAGAAAATGGAGTCTCAGCAGGAGTAAGTGACTTTCTGCAAGTCAGAGTTATTATGATTTTAACTGTAATAAGGCTTTTCATAAGCAC-GAAAGTTGAAGTTATTTTTAACTGAATAACTTATTATATGGACAGAAACATATTTTAAAGTGGTATTTCTGTGGATAAGACTGTTCCTCGGAGATAAAAAAAAA---------GCTATTGTTTTCGGTTCTAGTTCTAGCAGTTTCATGCATACGCACTACGCATATAAGGCAAATTGCCGCCCACAAGGTGTCAGGATAGGGTTATATCAAAACTAACGTTCTTTATGGAGTTGTGCTTATGAATTCAAATTATAACAAATCTGCAGATAGAAGTACTGGAAGAATTTCTTTACAACAGGAATGAACTGAGCAGGACAAGACTTGCTGTAAGATAGAGAAGACTCAAAAGCAGTAGAATTTTTAGAAAAGTGTACTGGATTTGTAGCTAAGATACTTGGATATCGGTAATATTTAAATATTATTTGTGCTGCTCTGATATGCTCTTTCCCTTCTGTGAGTTTCATTTCCTCATTATTAAAATAATATGATTTAAACTAGATGACCTTTAACTCCCTTCTAGCTCTCATTTGGCATGATTTCATGAGCATTCCCCCTCTGAATCCTGCCCCTAACTAATACCATCACCATTGCGACTGCTGCCACTTATGCAGCTGGTACCAACTCCATAAATCTTCGCTCTCAATCTTCCCTGTCTTTTCACCACTCATCAGTAAGTCACTGGCACCACTAAGTAAACATGTTTATCAAATTTACTTCTCCATTTTATATGATGCTGAAGCCTGTCTGTGGGTTTGTCATCCTGGGAGGAGAAGAAATAATTAAACAGAAAAAAA-GTTGCTGATGGGGGCCCCTCCCACTCTCTAGAGGACAACTTTTAAATGTCATCTGGGAACTGAACTTGCTTTGCCTCATCTTACATTTTTCTTTTATTTTTAACCACTAAATTTCACATGAATTATCCAAAACAATCTGATCTCCATGACCCTGGTGTTCTTCATTCAGCCGCTTACAACCAGAACCAAAGAGTAGCAGCTAGAATTGGAAACTCTGCTGTTTCCTGAATAAATCTATATCAACTCCAAATAAGCCTGTTTGACATCCAAAACACACAAATTTGGACACATTCTGCAAGTATAGACATTTTCCTCTGTTAGGGGAAGTGAAAATTATTTTTATCCTTAAAATGAATTAAAGCAATTA-GACCGCTACCAAGCAACAACTTAAAGTTTGAATCTGAACTTTTACGCATGAATCTGTATTGGATTTTCAATCATTTAGGAAGGTGGCCTAATTAGATATAATTTTTGCAGTTGTTGCAGCATTTTATGGGTGGAAATAATCATGTTCTTTGGGAAGACCTGGTATCATATCATGTCTCAGTTGTTGGCTCTCTGGCCTGAAACAATTCACTTCATATCCCCGGGCTTCAGTTTCCTCTTTTGTAAAATTAGAATAGTTTCTGCCACATAATTTGCTTTAAACATTAAAGAAAAATGTGTGTGAAAATAATAATCTGAGTAAACAGAAAACCCCCAGAATGGGAGAAAATATTTGCAGACTATGCATCTGACAAAGGACTAGAAACTAGAATCTACAAGGAACTCAAACAAGTCAACAATAGAAAAAGAAATATTCTCGTTATAAAGTGCTCAAAGGACATAAACAGAGATTCCTCAAAAGAAGATATACAAATGGCCAACAACCATGAAAAAA-TGCTCGACATCACTAATGATCAGATAAATGCAAATTAAATCCAGAATAAAATAGCACCTTACTGCAAATGGCTATTATTAAAAAGTCAAGAAAAATAGATGCTGGTATGTTTGTGGATAAAAGAGAATGCTTCTACACTGCTGGTGGGAATGTAAATTAATACAATTTCTATAGAAAACAGTATGGAGATTCCTTAAAGAGCTACAAGTAAATCTACCATTTGATACAGCAATCCTACTAATCACAATTGCAAAGATGTGTAATGAATCTATGTGCCAATTGACTAATGAGTGGATAAAGTAAACGTGGTATATATATA--CTATGGAATACTCCTCTGCCATAAAAAGGATCGCAGTAATGTATTTTGCAGTAACTTGGATGGAGCTGGAGTCCACTATTCTAAGTAAAATAACACAAGAGTGAAAAATAATAATA---TAAAAAGATGTTCCCAATTATAAGTGACAGATAAGCTACGATTATGCAAAGGTATACAGAGTGATATAATGGAATCTAGAGACTCAGAAGGGGGAGGGTGAGACAGGCTAGGCATAAAAGTATTACACATTGGGTACAATGTTCACTACTCGGGTGATGGGTACACTAAAAATCTCAGAATTTACTGCTATATAATTTATCCGTGCAACAGAATAAACACTTGCAGTTCAAGAAAATACTGAAATAAAAATT--AAAAAAAGAAAATGTGTGTAAAAGTACCTATTTTCATGTCTGATACCCAGTAAGCATTAAATAAATGTGAGTTCATTTCCTCTTTATTTGTACACAGAGTCATCTCCAAGGGCCTTTGGTTGGATCCTATACATTTCTTAATTTAGAAAATCCCCTAAGAAGTGTAGTTGTAGCAGAGGACTAGAATATCTAGAGCAGTAATTTTTAAAGTGAAAGGGTAGAAAATAAGTGTTACTTGAAAAAACATATTCCTTATTATAACAAATATATTTGGAAAACAAAATTTAAAATGTCATTATTGTTGCTACAATAAAAACTGTGAAAGTACAGATCTACAAAATCTTCTTAGCTGTCGGGCATTTAGTACTTGGAAAATGTCAATGTGATGGAGCAGATTTTTCTACAAGTCCAGGGTCTGGTTCCTAAGAAGGCAAGTTCACAGTAACCTTGTAGTGAAATGTTTATGTTTCTCAAAGGGAACCTTGGTTTTAAAAGATTGAGAAATGCCGACTGAGTGTCATTGTCACTGTGGAAATCAGATTTCAGAAAGTTTTATCTTTTTTCTTGCATTTTCTCATTTTTTAAAAAGGGAAATTGCTTACAAAGCATTTGTCTGTAGTCTAAAAGTTGAAGCTCTCATGATGACATTACCTGAAAGAAATATAATGCCAATTGGGAAAGGATACTCAGTTCTCTTGGAGATCTGAACTACACTTCCAGAATGTCCTCTCTAGATAGATTTCCCTATTAAGATTCCATTATTCACCACTCCATAACATTTAACTCTTCGT-AGGTATCTAACAGTC-AAATCAAATCATTGGATTACTAGGAAGGAAATTAGAAACCATCTATTCCAAGCCCTCTCCCATTATAATAGACGAGATTATTGAGACCTACAGAAATGAAATAACTCACCAAAGGCCACACCAGTCATTGGCAGAACTTGAACTATAACATAGACTTCTGACTCCTTGTGTATTAATATATCTATTTTATCACTCTACCTGTGATGTATATGAATTGATACTAGGAGAAAACTTTCCCACAAAATATACTGATCTGAAGAATAAATAAACCTTTTTGCCAAAAGCTTTTAAAATAAATCATAGACCCCCAGGAAGCCATTGCCATGACTGTGAGAACTTTTAGAAAGTCTCATTTTACTATAAACAGCTCTGTTCTCTTTGCTTGAGCCAT?????   [4824]
M_talapoin_1511            TTTCCTTTGCAGGGACATGGATGGAGTTGGAAGTTATTATCCTCAGCAATCTAATGCAGGAATTGAAAACCAAACACCACATGTTCTCACTTATAAATCGGAGCTGAATTATGAGAACACATGGACACATGGTGAGAAACAACAAACACTGGAGTCTGTTGGGGGCTGTTTGGTGAGAGAGAGCATCAGGAAGAGTAGCTAATGGATGCTGGGCTGAATAATTAGGTGATGGGATGATCTTTTCAGCAAATGACCATGACACACATTTACCTCTGTCACAACCTTGCACGTCCTGCACATGTATCCCTAAACTTAAAGTAAAAGTTGAAGAAAAAATAAATGGAAAGAAAAACAAAGATCAAAGTATGTCTCTAAAGACATTCCTGATAATAAAAATGGCACAATGTTATGACTAAAACTTCATCATATTCCTTTTTTACCTGGAGCCCAATTCAGAGGTCAATA-----CTTCTGTCTCAATATCGCATCTCAACTCTCATTGTTTCCTTACATCAGGCAACCCTACTCTCACTCCCCTCTTCTTCAAACTCCTACTGAATTTGTAGGCTGCACTGTGAGAAGGTAAGACTACAGATCATAGGCACATATTAACAGAGCCTTAGGCATTTTTGCTTGTAAAGTCTCTCCCATGAACCACTCTCCCACACAACAGCCATAATCTTTCTCCTTTCTGCTACTGAAGAAAATGTGGTCAAAGCAAGAATAATAAGGTTTTGGTCTAAGAAATCTGAACACCTAAGAGCTTAAAAGCAGGCAATCCAGCTTTCTATTTGAAATCCAACAGGAATCCCTTAAGCTTAATTAGGAATTTGGTCACTGAAAACTTGATTTTATGGAAATAACTAAATGTTTTCTCACAATACAAATGTGTGGCAGGTCTTTAAATGTGATTCATTGGAGCTGAGTCCAAAACCTTACTAGATACTAGTACCATCTACCCCAAAGCAGCTGCTCTTTCCAACCAACTAGCTCAGCATTGTGGTTTTCACAAAGTTACAGCCAAAGTGAGCTTATATTATTATGGCATCAGAATTTATATTAGTTTTCTAAGTCCCAGTGAAGAAATTTCCACATCCTGTCAGTAACTAGCTAAGTGCTATTCACATGTTACCTCTAATCTTTGTAAGAATTCTGAGTTAATTATTACTATAATCCTTTACAGATTAGAAAATGGAGTCTCAGCAGGAGTAAGTGACTTTCTGCAAGTCAGAGTTATTATGATTTTAACTGCAATAAGGCTTTTCATAAGCAT-GAAAGTTGAAGTTGTTTTTAACTGAATAACTTATTATATGGACAGAAACATATTTTAAAGCGGTATTTCTGTGGATAAGACTGTTCCTCGGAGATAAAAAAAA----------GCTATTGTTTTCGGTTCTAGTTCTAGCAGTTTTATGCATACGCACTATGCATATAAGGCAAATTGCCGCCCACAAGGTGTCAGGATAGGGTTATATCAAAACTAACGTTCTTTATGGAGTTGTGCTTATGAATTCAAATTATAACAAATCTGCAGATAGAAGTACTGGAAGAATTTCTTTACAACAGGAATGATCTGAGTAGGACAAGACTTGCTGTAAGATAGAGAAGACTCAAAAGCAGTAGAATTTTTAGAAAAGTGTACTGGATTTGTAGCTAAGATACTTGGATATCGGTAATATTTAAATATTCTTTGTGCTGCTCTGATATGCTCTTTCCCTTCTGTGAGTTTCATTTCCTCATTATTAAAATAATATGATTTAAACTAGATGACCTTTAACTCCCTTCTAGTTCTCATTTGGCATGATTTCATGAGCATTCCCCCTCTGAACCCTGCCCCTAACTAATACCATCACCACTGCGACTGCTGCCACTTATGCAGCTGGTACCAACTCCATAAATCTTCGCTCTCAATCTTCCCCGTCTTTTCACCACTCATCAGTAAGTCACTGGCACCACTAAGTAAACATGTTTATCAAATTTACTTCTCCATTTTATTTGATGCTGAAGCCTCTCTGTGGGCTTGTCATCCTGGGAGGAGAAGAAATAATTAAACAGAAAAAAA-GTTGCTGATGGGGGCCCCTCCCACTCTCTAGAGGACAACTTTTAAATGTCATCTGGGAACTTAACTTGCTTTGCCTCATCTTACATTTTTCTTTTATTTTTAACCACTAAATTTCACATGAATTATCCAAAACAATCTGATCTCCATGACCCTGGTGTTCTTCATTCAGCTGCTTACAACCAGAACCAAAGAGTAGCAACTAGAATTGGAAACTCTGCTGTTTCCTGAATAAATCTATATCAACTCCAAATAAGCCTGTTTGACATCCAAAACACACAAATTTGGACACATTCTGCAAGTATAGACATTTTCCTCTGTTAGGGGAAGTGAAAATTATTTTTATTCTTAAAATGAATTAAAGCAATTA-GACCACTACCAAGCAACAACTTA--GTTTGAATCTGAACTTTTACGCATGAATCTGTATTGGATTTTCAATCATTTAGGAAGGTGGCCTAATTAGATATCATTTTTGCAGTTGTTGCAGCATTTTATGGGTGGAAATAATCATGTTCTTTGGGAAGACCTGGTATCATATCATGTCTCAGTTGTTGGCTCTCTGGCCTGAAACAATTCACTTCATATCCCCGGGCTTCAGTTTCCTCTTTTGTAAAATTAGAATAGTTTCTGCCACATAATTTGTTTTAAACATTAAAGAAAAATGTGTGTGAAAATAATAATCTGAGTAAACAGAAAACTCCCAGAATGGGAGAAAATATTTGCAGACTATGCATCTGACAAAGGACTAGAAACTAGAATCTACAAGGAACTCAAACAAGTCAACAATAGAAAAAGAAATATTCTCGTTATAAAGTGCTCAAAGGACATAAATAGAGATTCCTCAAAAGAAGATGTACAAATGGCCAACAACCATGAAAAAA-TGCTCGACATCACTAATGATCAGATAAATGCAAATTAAATCCAGAATAAAATAGCACCTTACTGCAAATGGCTATTATTAAAAAGTCAAGAGAAATAGATGCTGGTATGTATGTGGATAAAAGAGAATGCTTCTACACTGCTGGTGGGAATGTAAATTAATACAATTTCTATAGAAAACAGTATGGAGATTCCTTAAAGAGCTACAAGTAAATCTACCATTTGATACAGCAATCCTACTAATCACAATTGCAAAGATGTGTAATGAATCTATGTGCCAATTGACTAATGAGTGGATAAAGTAAACGTGGTATATATATA--CTATGGAATACTCCTCTGCCATAAAAAGGACCGCAGTAATGTATTTTGCAGTAACTTGGATGGAGCTGGAGTCCACTATTCTAAGTAAAATAACACAGGAGTGAAAAATAGTAATA---TAAAAAGATGTTCCCAATTATAAGTGACAGATAA----------TGCAAAGGTATACAGAGTGATATAATGGAATCTAGAGACTCAGAAGGGGGAGGGTGAGACAGGCTAGGCATAAAAGTATTACACATTGGGTACAATGTTCACTACTCGGGTGATGGGTACACTAAAAATCTCAGAATTTACTGCTATATAATTTATCCGTGCAACAGAATAAACACTTGCAGTTCAAGAAAATACTGAAATAAAAATT--AAAAAAAGAAAATGTGTGTAAAAGTACCTATTTTCATGTCTGATACCCAGTAAGCATTAAATAAATGTGAGTTCATTTCCTCTTTATTTGTACACAGAGTCATCTCCAAGGGCCTTTGGTTGGATCCTATACATTTCTTAATTTAGAAAATCCCCTAAGAAGTGTAGTTGTAGCAGAGGACTAGAATATCTAGAGCAGTAATTTTTAAAGTGAAAAGGTAGAAAATAAGTGTTACTTGAAAAAACATATTCCTTATTATAACAAATATATTTGGAAAACAAAATTAAAAATGTCATTATTGTTTCTACAATAAAAACTGTGAAAGTACAGATCTACAAAATCTTCTTAGCTGTTGGGCATTTAGTACTTGGAAAATGTCAATGTGA??????????????????????????????????????????????????????????????????????????????????????????????????????????????????????????????????????????????????????????????????????????????????????????????????????????????????????????????????????????????????????????????????????????????????????????????????????????????????????????????????????????????????????????????????????????????????????????????????????????????????????????????????????????????????????????????????????????????????????????????????????????????????????????????????????????????????????????????????????????????????????????????????????????????????????????????????????????????????????????????????????????????????????????????????????????????????????????????????????????????????????????????????????????????????????????????????????????????????????????????????????????????????   [4815]
A_nigroviridis_R14697      TTTCCTTTGCAGGGACATGGATGGAGTTGGAAGTCATTATTCTCAGCAATCTAATGCAGGAATTGAAAACCAAACGCCACATGTTCTCACTTATAAATGGGAGCTGAATTATGAGAACACATGGACACATGGTGAGAAACAACAAACATTGGAGTCTGTTGGGGGCTGTTTGGTGAGAGAGAGCATCAGGAAGAATAGCTAATGGATGCTGGGCTGAATAATTAGGTGATGGGATGATCTTTTCAGCAAATGACCATGACACACATTTACCTCTGTCACAACCCTGCACATCCTGCACATGTATCCCTAAACTTAAAGTAAAAGTTGAAGAAAAAAAAA-TGGAAAGAAAAACACAGATCAAAGTATGTCTCTAAAGATATTCCTGATAATAAAAATGGCACAATGTTATGACTAAAACTTCATCATTTTCCTTTTTTACCTGGAGCCCAATTCAGAGGTCAATA-----CTGCTGTCTCAATATCGCATCTCAACTCCCATTTTTTCCTTACAACAGGCAACCCTACTCTCACTCCCCTCTTCTTCAAACTCCTACTGAATTTGTAGGCTGCACTGTGAGAAGGTAAGACTACAGAGCATAGGCACATATTAACAGAGCCTTAGGCATTTTTGCTTGTAAAGTCTCTCCCATGAACCACTCTCCCAAACAACAGCCATAATCTTTCTCCTTTCTGCTACTGAAGAAAATGTGGTCAAAGCAAGAATAATAAGGTTTTGGTCTAAGAAATCTGAACACCTAAGAGCTTAAAAGCAGGCAATGCAGCTTTCTATTTGAAATCCAACAGGAATCCCTTAAGCTTAATTAGGAATTTTGTCACTGAAAACTTTATTTTATGGAAATAACTAAATGTTTTCTCACAATACAAACGTGTGGCAGGTCTTTAAGTGTGATTCATTGGAGCTGAGTCCAAAACCTTACTAGATACTAGTACCATCTACCCCAAAGCAGCTGCTCTTTCCAACCAACTAGCTCAGCGTTGTGGTTTTCACAAAGTTACAGCCAAAGTGAGCTTATATTATTATGGTATCAGAATTTATATTAGTTTTCTAAGTCCCAGTGAAGAAATTTCCACATCCTGTCAGTAACTAGCTAAGTGCTATTCACATGTTACCTCTAATCTTTGTAAGAATTCTGAGTTAATTATTACTATAATCCTTTACAGATTAGAAAATGGAGTCTCAGCAGGAGTAAGTGACTTTCTGCAAGTCAGAGTTATTATGATTTTAACTGTAATAAGGCTTTTCATAAGCAC-GAAAGCTGAAGTTATTTTTAATTGAATAACTTATTTTATGGACAGAAACATATTTTAAAGTGGTATTTCTGTGGATAAGACTGTTCCTCGGAGATAAAAAAAAA---------GCTATTGTTTTCGGTTCTAGTTCTAGCAGTTTTATGCATACGCATTACGCATATAAGGCAAATTGCCACCCACAAGGTGTCAGGATAGGGTTATATCAAAACTAACGTTCTTTATGGAGTTGTGCTTATGAATTCAAATTATAACAAATCTGCAGATAGAAGTACTGGAAGAATTTCTTTACAACAGGAATGATCTGAGTAGGACAAGACTTGCTGTAAGATAGAGAAGACTCAAAAGCAGTAGAATTTTTAGAAAAGTGTACTGGATTTGTAGCTAAGATACTTGGATATCGGTAATATTTAAATACTCTTTGTGCTGCTCTGATATGCTCTTTCCCTTCTGTGAGTTTCATTTCCTCATTATTAAAATAATATTATTTAAACTAGATGACCTTTAACTCCCTTCTAGCTCTCATTTGGCATGATTTCATGAGCATTCCCCCTCTGAACCCTGCCCCTAACTAATACCATCACCATTGCAACTGCTGCCACTTATGCAGCTGGTACCAACTCCATAAATCTTCGCTCTCAATCTTCCCCGTCTTTTCACCACTCATCAGTAAGTCACTGGCACCACTAAGTAAACATGTTTATCAAATTTACTTCTCCATTTTATTTGATGCTGAGGCCTGTCTGTGGGCTTGTCATCCTGGGAGGAGAAGAAATAATTAAACAGAAAAAAA-GTTCCTGATGGGGGCCCCTCCCACTCTCTAGAGGACAACTTTTAAATGTCATCTGAGAACTTAACTTGCTTTGCCTCATCTTACATTTTTCTTTTATTTTTGACCACTAAATTTCACATGAATTATCCAAAACAATCTGATCTCCATGACCCCGGTGTTCTTCATTCGGCCGCTTACAACCAGAACCAAAGAGTAGCAGCTAGAATTGGAAACTCTGCTGTTTCCTGAATAAATCTATATCAACTCCAAATAAGCCTGTTTGACATCCAAAACACACAAATTTGTACACATTCTGCAAGTATAGACATTTTCCTCTGTTAGGGGAAGTGAAAATTATTTTTATCCTTAAAATGAATTAAAGCAATTA-GACCACTACCAAGCAACAACTTAAAGTTTGAATCTGAACTTTTACGCATGAATCTGTATTGGATTTTCAATCATTTAGGAAAGTGGCCTAATTAGATATCATTTTTGCAGTTGTTGCAGCATTTTATGGGTGGAAATAATCATGTTCTTTGGGAAGACCTGGTATCATATCATGTCTCAGCTGTTGGCTCTCTGGCCTGAAACAATTCACTTCATATCCCCGGGCTTCAGTTTCCTCTTTTGTAAAATTAGAATAGTTTCTGCCACATAATTTGTTTTAAACATTAAAGAAAAATGTGTGTGAAAATAATAATCTGAGTAAACAGAAAACCCCCAGAATGGGAGAAAATATTTGCAGGCTATGCATCTGACAAAGGACTAGAAACTAGAATCTACAAGGAACTCAAACAAGTCAGCAATAGAAAAAGAAATATTCTCATTATAAAGTGCTCAAAGGACATAAATAGAGATTCCTCAAAAGAAGATATACAAATGGCCAACAACCATGAAAAAA-TGCTCGACATCACTAATGATCAGATAAATGTAAATTAAATCCAGAATAAAATAGCACCTTACTGCAAATGGCTATTATTAAAAAGTCAAGAAAAATAGATGCTGGTATGTATGTGGATAAAAGAGAATGCTTCTACACTGCTGGTGGGAATGTAAATTATTACAATTTCTATAGAAAACAGTATGGAGATTCCTTAAAGAGCTACAAGCAAATCTACCATTTGATACAGCAATCCTACTAATCACAATTGCAAAGATGTGTAATGAATCTATGTGCCAATTGACTAATGAGTGGATAAAGTAAACGTGGTATATATATA--CTATGGAATACTCCTCTGCCATAAAAAGGATCGCAGTAATGTATTTTGCAGTAACTTAGATGGAGCTGGAGTCCACTATTCTAAGTAAAATAACACAGGAGTGAAAAATAATAATA---TAAAAAGATGTTCCCACTTATAAGTGACAGATAAGCTATGATTATGCAAAGGTATACAGAGTGATATAATGGAATCTAGAGACTCAGAAGGGGGAGGGTGAGACAGGCTAGGCATAAAAGTATTACACATTGGGTACAATGTTCACTACTCGGGTGATGGGTACACTAAAAATCTCAGAATTTACTGCTATATAATTTATCCGTGCAACAGAATAAACACTTGTAGTTCAAGAAAATACTGAAATAAAAATTT-AAAAAAAGAAAATGTGTGTAAAAATACCCATTTTCATGTCTGATACCCAGTAAGCATTAAATAAATGTGAGTTCATTTCCTCTTTATTTGTACACAGAGTCATCTCCAAGGGCCTTTGGTTGGATCCTATACATTTCTTAATTTAGAAAATCCCCTAAGAAGTGTAGTTGTAGCAGAGGACTAGAATATCTAGAGCAGTAATTTTTAAAGTGAAAGGGTAGAAAATAAGTGTTACTTGAAAAAACATATTCCTTATTATAACAAATATATTTGGAAAACAAAATAAAAAATGTCATTATTGTTTCTACAGTAAAAACTGTGAAAGTACAGATCTACAAAATCTTCTTAGCTGTTGGGCATTTAGTACTTGGAAAATGTCAATGTGATGGAGCAGATTTTTCTACAAGTCCAGGGTCTGGTTCCTAGGAAGGCAAGTTCACAGTAACCTTGTAGTGAAATGTTTATGTTTCTCAAAGGGAACCTTGGTTTTAAAAGATTGAGAAATGCCGACTGAGTGTCATTGTCACTGTGGAAATCAGATTTCAGAAAGTTTTATCTTTTTTCTTGCATTTTCTCATTTTTTGAAAAGGGAAATTGCTTACAAAGCATTTGTCTGTGGTCTAAAAGTTGAAGCTCTCATGATGACATTACCTGAAAGAAATATAATGCCAATTGGGAAAGGATACTCAGTTCTCTTGGAGATCTGAACTACACTTCCAGAATGTCCTCTCTAGATAGATTTCCCTATTAAGATTCCATTATTCACCACTCCATAATATTTAACTCTTCGT-AGGTATCTAACAGTCTAAATCAAATCATTGGATTACTAGGAAGGAAATTAGAAACCATCTATTCCAAGCCCTCTCCCATTATAATAGATGAGATTATTGAGACCCACAGAAATGAAATAACTCACCAAAGGCCACACCAGTCATTGGCAGAACTTGAACTATAACATAGACTTCTGACTCCTTGTGTATTGATATATCTATTTTATCACTCTACCTGTGATGTATATGAATTGATACTAGGAGAAAACTTCCCCACAAAATATACTGATCTGAAGAATAAATAAACCTTTTTGCCAAAAGCTTTTAAAATAAATCATAGACCCCCGGGAAGCGATTGCCATGACTGTGAGAACTTTTAGAAAGTCTCATTTTACTATAAACAGCTCTGTTCTCTTTGCTTGAGCCATTACAA   [4827]
M_mulatta_19874            TTTCCTTTGCAGGGACATGGATGGAGTTGGAAGTCATTATCCTCAGCAATCTAATGCAGGAATTGAAAACCAAACACCATATGTTCTCACTTATAAATGGGAGCTGAATTATGAGAACACATGGACACATGGTGAGAAACAACAAACATTGGAGTCTGTTGGGGGCTGTTTGGTGAGAGAGAGCATCAGGAAGAATAGCTAATGGATGCTAGGCTGAATAATTAGGTGATGGGATTATCTTTTCAGCAAATGACCATGACACACATTTACCTCTGTCACAACCCTGCACATCCTGCACATGTATCCCTAAACTTAAAATAAAAGTTGAAGAAAAAAAAAATGGAAAGAAAAACAAAGATCAAAGT-TGTCTCTAAAGATATTCCTGATAATAAAAATGGCACAATGTTATGACTAAAACTTCATCATATTCCTTTTTTACCTGGAGCCCAATTCAGAGGTCAATACTTTACTTCTGTCTCAATATCACATCTCAACTCCCATTTTTTCCTTACATCAGGCAACCCTACTCTCACTCCCCTCTTCTTCAAACTCCTACTGAATTTGTAGGCTGCACTGTGAGAAGGTAAGACTACAGAGCATAGGCACATATTAACAGAGCCTTAGGCATTTTTGCTTGTAAAGTCTCTCCCATGAACCACTCTCCCAAACTACAGCCATAATCTTTCTCCTTTCTGCTACTGAAGAAAATGTGGTCAAAGCAAGAATAATAAGGTTTTGGTCTAAGAAATCTGAACACCTAAGAGCTTAAAAGCAGGCAATCCAGCTTTC----------------------CCTTAAGCTTAATTAGGAATTTGGTCACTGAAAACTTTATTTTGTGGAAATAACTAAATGTTTTCTCACAATACAAATGTGTGGCAGGTCTTTAAATGTGATTCATTGGAGCTGAGTCCAAAACCTTACTAGATACTAGTACCATCTACCCCAAAGCAGCTGCTCTTTCCAACCAACTAGCTCAGCGTTGTGCTTCTCACAAAGTTACAGCCAAAGTGAGCTTATATTATTATGGCATCAGAATTTATATTAGTTTTCTAAGTCCCAGTGAAGAAATTTCCACATCCTGTCAGTAACTAGCTAAGTGCTATTCACATGTTACCTCTAATCTTTGTAAGAATTCTGAGTTAATTATTACTATAATCCTTTACAGATTAGAAAATGGAGTCTCAGCAGGAGTAAGTGACTTTCTGCAAGTCAGAGTTATTACGATTTTAACTGTAATAAGGCTTTTCATAAGCACAGAAAGCTGAAGTTATTTTTAACTGAATAACTTATTATATGGACAGAAACATATTTGAAAGTGGTATTTCTGTGGATAAGACTGTTCCTCGGAGATAAAAAAAA----------GCTATTGTTTTCGGTTCTAGTTCTAGCAGTTTTATGTATACACACTATGCATATAAGGCAAATTGCCGCCCACAAGGTGTCAGGATAGGGTTATATCAAAACTAACGTTCTTTATGGAGTTGTGCTTATGAATTCAAATTATAACAAATCTGCAGATAGAAGTACTGGAAGAATTTCTTTACAACAGGAATGATCTGAGTAGGACAAGACTTGCTGTAAGATAGAGAAGACTCAAAAGCAGTAGAATTTTTAGAAAAGTGTACTGGATTTGTAGCTAAGATACTTGGATATTGGTAATATTTAAATACTCTTTGTGCTGCTCTGATATGCTCTTTCCCTTCTGTGAGTTTCAATTCCTCATTATTAAAATAATATGATTTAAACTAGATGACCTTTAACTCCCTTCTAGCTCTCATTTGGCATGATTTCATGAGCATTCCCCCTCCGAACCCTGCCCCTAACTAATACCATCACCACTGCGA-TGCTGCCACTTATGCAGCTGGTACCAACTCCATAAATCTTCGCTCTCAATCTTCCCCGTCTTTTCACCACTCATCAGTAAGTCACTGGCACCACTAAGTAAACATGTTTATCAAATTTACTTCTCCATTTTACTTGATGCTGAGGCCTGTCTGTGGGCTTGTCATCCTGGGAGGAGAAGAAATAATTAAACAGAAAAAAAAGTTGCTGATGGGGGCCCCTCCCACTCTCTAGAGGACAACTTTTAAATGTCATCTGGGAACTTAACTTGCTTTGCCTCATCTTACATTTTTCTTTTATTTTTAACCACTAAATTTCACATGAATTATCCAAAACAATCTGATCTCCATGACCCCGGTGTTCTTCATTCAGCCGCTTACAACCAGAACCAAAGAGTAGCAGCTAGAATTGGAAACTCTGCTGTTTCCTGAATAAATCTATATCAACTCCAAATAAGCCTGTTTGACATACAAAACACACAAATTTGGACACATTCTGCAAGTATAGACATTTTCCTCTGTTAGGGGAAGTGAAAATTATTTTTATCCTTAAAATGAATTAAAGCAATTATGACCACTACCAAGCAACAACTTAAAGTTTGAATCTGAACTTTTACGCATGAATCTGTATTGGATTTTCAATCATTTAGGAAGGTGGCCTAATTAGATATCATTTTTGCAGTTGTTGCAGCATTTTATGGGTGGAAATAATCATGTTCTTTGGGAAGACCTGGTATCATATCATGTCTCAGTTGTTGGCTCTCTGGCCTGAAACAATTCACTTCATATCCCCGGGCTTCAGTTTCCTCTTTTGTAAAATTAGAATAGTTTCTGCCACATAATTTGTTTTAAACATTAAAGAAAAATGTGTGTGAAAATAATAATCTGAGTAAACAGAAAACCCCCAGAATGGGAGAAAATATTTGCAGACTATGCATCTGACAAAGGACTAGAAACTAGAATCTACAAGGAACTCAAACAAGTCAGCAATAGAAAAAGAAATAATCTCATTATAAAGTGCTCAAAGGACATAAATAGAGATTCCTCAAAAGAAGATATACAAATGGCCAACAAACATGAAAAAA-TGCTCGACATCACTAATCATCAGATAAATGCAAATTAAATCCAGAATAAAACAGCACCTTACTGCAAATGGCTATTATTAAAAAGTCAAGAAAAATAGATGCTGGTATGTATGTGGATAAAAGAAAATGCTTCTACCCTGCTGGTGGGAATGTAAATTAATACAATTTCTATAGAAAACAGTATGGAGATTCCTTAAAGAGCTACAAGTAAATCTACCATTTGATACAGCAATCCTACTAATCACAATTGCAAAGATGTGCAATGAATCTATGTGCCAATTGACTAATGAGTGGATAAAGTAAACGTGGTATATATATA--CTATGGAATACTCCTCTGCCATAAAAAGGATCGCAGTAATGTATTTTGCAGTAACTTGGATGGAGCTGGAGTCCACTATTCTAAGTAAAATAACACAAGAGTGAAAAATAATAATAA--AAAAAAGATGTTCCCACTTATAAGTGACAGATAAGCTACGATTATGCAAAGGTATACAGAGTGATATAATGGAATCTAGAGACTCAGAAGGGGGAGTGTGAGACAGGCTAGGCATAAAAGTATTACACATTGGGTACAATGTACACTACTCGGGTGATGGGTACACTAAAAATCTCAGAATTTACTGCTATATAATTTATCCATGCAACAGAATAAACACTTGTAGTTCAAGAAAATACTGAAATAAAAATT--AAAAAAAGAAAATGTGTGTAAAAGTACCTATTTTCATGTCTGATACCCAGTAAGCATTAAATAAATGTGAGTTCATTTCCTCTTTATTTGTACACAGAGTCATCTCCAAGGGCCTTTGGTTGGATCCTATACATTTCTTAATTTAGAAAACCCCCTAAGAAGTGTAGTTGTAGCAGAGGACTAGAATATCTAGAGCGGTAATTTTTAAAGTGAAAGGGTAGAAAATAAGTGTTACTTGAAAAAACATATTCCTTATTATAACAAATGTATTTGGAAAACAAAACAAAAAATGTCATTATTTTTTCTACAATAAAAACTGTGAAAGTACAGATCTACAAAATCTTCTTAGCTGTTGGGCATTTAGTACTTGGAAAATGTCAATGTGCTGGAGCAGATTTTTCTACAAGTCCAGGGTCTGGTTCCTAGGAAGGCAAGTTCACAGTAACCTTGTAGTGAAATGTTTATGTTTCTCAAAGGGAACCTTGGTTTTAAAAGATTGAGAAATGCTGATTGAGTGTCATTGTCACTGTGGAAATCAGATTTCAGAAAGTTTTATCTTTTTTCTTGCATTTTCTCATTTTTTAAAAAGGGAAATTGCTTACAAAGCATTTGCCTGTGGTCTAAAAGTTGAAGCTCTCATGATGACATTACCTGAAAGAAATATAATGCCAATTGGGAAAGGATACTCAGTTCTCTTGGAGATCTGAACTACACTTCCAGAATGTCCTCTCTAGATAGATTTCCCTATTAAGATTCCATTATTCACCACTCCATAACATCTAACTCTTCGTTAAGTATCTAACAGTCTAAATCAAATCATTGGATTACTAGGAAGGAAATTAGAAACCATCTATTCCAAGCCCTTTCCCATTATAATAGACGAGATTATTGAGACCCACAGAAATGAAATAACTCACCAAAAGCCACACCAGTCATTGGCAGAACTTGAACTATAACATAGACTTCTGACTCCTTGTGTATTGATATATCTATTTTATCACTCTACCTGTGATGTATATGAATTGATACTAGGAGAAAACTTCCCCACAAAATATACTGATCTGAAGAATAAATAAACCTTTTTGCCAAAAGCTTTTAAAATAAATCATAGACCCCCAGGAAGCCATTGCCATGACTGTGAGAACTTTTAGAAAGTCTCATTTTACTATAAACAGCTCTGTTCTCTTTGCTTGAGCCATTACAG   [4812]
T_obscurus_CBS             TTTCCTTTGCAGGGACATGGAAGGAGCTGGAAGTCATTATCCTCAGCAATCTAATGCAGGAATTGAAAACCAAACACCACATGTTCTCACTTATAAATGGGAGCTGAATTATGAGAACACATGGACACATGGAGAGAAACAACAAACACTGGAGTCTGTTGGGGGCTGTTGGGTGAGAGAGAGCATCAGGAAGAATAGCTAATGGATGCTGGACTGAATAACTAGGTGATGGGATGATCTTTTCAGCAAATGACCATGACACACATTTACCTATGTCACAACCCTGCACATCCTGCGCATGTATCCCTAAACTTAAAATAAAAGTTGAAGAAAAAAAAA-TGGAAAGAAAAACAAAGATCAAAGTATGTCTCTAAAGGTATTCCTGTTAATAAAAATGGTACAATGTCATGACTAAAACTCCATCATATTCCTTTTTTACCTGRAGCCCAATTCAGAGGTCAATATTTTACTTCTGTCTCAATATCGCATCTCAACTCCCATTTTTTCCTTACATCAGGCAACCCTACTCTCACTCCCCTCTTCTTCGAACTCCTACTGAATTTGTAGGCTGCACTGTGAGAAGGTAAGACTACAGAGCATAGGCACATATTAACAGAGCCTTAGGCATTTTTGCTTGTAAAGTCTCTCCCATGAACCACTCTCCCAAACAACAGCCATAATCTTTCTCCTTTCTGCTACTGAAGAAAATGTGGTCAAAGCAAGAATAATAAGGTTTTGGTCTAAGAAATCTGAACACCTAAGAGCTTAAAAGCAGGCAATCCAGCTTTCAATTTGAAATCCAACAGGAATCCCTTAAGCTTAATTAGGAATTTGGTCACTGAAAACTTTATTTTGTGGAAATAACTAAATGTTTTCTCACAATGCAAACGTGTGGCAGGTCTTTAAATGTGATTCACTGGGGCTGAGTCCAAAACCTTACTAGATACTAGTACCATCTACCCTAAAGCAGCTGCTCTTTCCAACCAACTAGCTCAGCGTTGTGGTTTTCACAAAGTGACAGCCAAAGTGAGTTTATATTATTATGGCATCAGAATTTATATTAGTTTCCTAAGTCCCAGTGAAGAAATTTCCACATCCTGTCAGTAATTAGCTAAGTGCTATTCACATGTTACCTCTAATCTTTGTAAGAATTCTGAGTTAATTATTACTGTAATCCTTTACAGATTAGAAAATGGAGTCTCAGCAGGAGTAAGTGACTTTCTGCAAGTCAGAGTTATTATGATTTCAGCTGTAATAAGGCTTTTCATAAGCACAGAAAGCTGAAGTTATTTTTAACTGAATAACTTATTATATGGACAGAAACATATTTTAAAGTGGTATTTCTGTGGATAAGACTGTTCCTCAGAGATAAAAAAA-----------GCTATCGTTTTCGGTTCTAGTTCTAGCAGTTTTATGCATACGCACTACGCATATAAGGCAAATTGCTGCCCACAAGGTGTCAGGATAGGGTTATATCAAAACCAACGTTCTTTATGGAGTTGTGCTTATGAATTCAAATTATAACAAATCTGCAGATAGAAGTACTGGAAGAATTTCTTTACAACAGGAATGATCTGAGTAGGACAAGACTTGCTGTAAGATAGAGAAGACTCAAAAGCAGTAGAATTTTTAGAAAAGTGTACTGGATTTGTGGCTAAGATACTTGGATTTCAGTAATATTTAAATACTCTTTGTGCTGTTCTGATATGCTCTTTCCCTTCTGTGAGTTTCATTTCCTCATTATTAAAATAATATGATTTAAACTAGATGACCTTTAACTCCCTTCTAGCTCTCATTTGGTGTGATTTCATGAGCATTCCCCCTCTGAACCCTGCCCCTAACTAATACCATCACCATTGCGACTGCTGCCACTTATGCAGCTGGTACCAACTCCATAAATCTTCGCTCTCAATCTTCCCCGTCTTTTCACCCCTCATCAGTAAGTCACTGACACCACTAAGTAAACATGTTTATCAAATTTACTTCTCCATTTTATTTGATGCTGAGGCCTGTCTGTGGGCTAGTCATCCTGGGAAGAGAAGAAATAATTAAACAGAAAAAAAAGTTGCTGATGGGGGCCCCTCCCACTCTCTAGAGGACAACTTTTAAATGTCATCTGGGAACTTAACTTGCTTTGCCTCATCTTATATTTTTCTTTCATTTTTAACCACTAAATTTCACATGAATTATCCAAAACAATCTGATCTCCATGACCCCGGTRTTCTTCATTCAGCCGTTTACAACCAGAACCAAAGAGTAGCAGCTAGAATTGGAAACTCTTCTGTTTCCTGAATAAATCTATATCAACTCCAAATAAGCCTGTTTGACATCCAAAACACACAAATTTGGACACATTCTGCAAGTATAGACATTTTCCTCTGTTAGAGGAAGTGAAAATTATTTTTATCCTTAAAATGAATTAAAGCAATTA-GACCACTACCAAGCAACAACTTAAAGTTTGAATCTGAACTTTTATGCATGAATCTGTATTGGATTTTCAATCATTTAGGAAGGTGGCCTAATTAGATATCATTTTTGCAGTTGTGGCAGCATTTTATGGGTGGAAATAATCATGTTCTTTGGGAAGACCTGGTACCATATCATGTCTCAGTTGTTGGTTCTCTAGCCTGAAACAATTCACTTCATATCCCCGGGCTTCAGTTTCCTCTTTCATAAAATTAGAATAGTTTCTGTCACATAATTTGTTTTAAACATTAAAGAAAAATGTGTGTGAAAATAATAATCTGAGTAAACAGACAATTCCCAGAATGGGAGAAAATATTTGCAGACTATGCATCTGACAAAGGACTAGAAACTAGCATCTACAAGGAACTCAAACAAGTAAGCAAGAGAAAAAGAAATAATCTCATTATAAACTGCTCAAAGGACATAAATAGAGATCCCTCAAAAGAAGATATACAAATGGCCAACAAACATGAAAAAAATGCTCGACATCACTAATCATCAGATAAATGCAAATTAAATCCAGAATAAAATAGCACCTTACTGCAAATGGCTATTACTAAAAAGCCAAGAAAAATAGATACTGGTATGTATGTGGATAAAAGAGAATGCTTGTACACTGCTGGTGGGAATGTAAATTAATACAATTTCTATAGAAAATAGTATGGAGATTCTTCAAAGAGCTACAAGTAAATCTACCATTTGATACAGCAATCCTACTAATTACAATTGCAAAGATGTGTAATGAATCTACGTGCCAATTGACTAACGAGTGGATAAAGTAAATGTGGTGTATATACA--CTATGGAATACTCCTCTGCCATAGAAAGGATCGCAATAATGTATTTTGCAGTAACTTGGGTGGAGCTGGAGTCCACTATTCTAAGTAAAATAACACAGGAGTGAAAAATAATAATAA--AAAAAAGATGTTCCCACTTATAAGTGACAGATAAGCTATGATTATGCAAAGGTATACAGAGTGATAAAATGGAATCTAGAGACTCAGAAGGGGGAGGGTGAGACAGGCTAAGCATAAAAGTATTACACATTGGGTACAATGTACAATACTCGGGTGATGGGTGCACTAAAAATCTCAGAATTTACTGCTATATAATTTATCCATGCAACAGAATAAACACTTGTAGTTCAAGAAAATACGGAAATAAAAATT--AAAAAAAGAAAATGTGTGTAAAAGTACCTATTTTCATGTCTGATACCCAGTAAGCATTAAATAAATGTGAGTTCATTTCCTCTTTATTTGTACACAGAGTGATCTCCAAGGGCCTTTGGTTGGATCCTATACATTTCTTGATTTAGAAAATCCCTTAAGAAGTGTAGTTATAGCAGAGGACTAGAATATCTAGAGCAGTAATTTTTTAAGTGAAAGGGTAGAAAATAAGTGTTACTTGAAAAAACATATTCCTTATTATAACAAATATATCTGGAAAACAAAATAAAAAATGTCATTATTGTTTCTACAATAAAAATTGTGAAAGTACAGATCTACAAAATCTTCTTAGCTGTTGGGCAATTAATACTTGGAAAATGTCAATGTGATGGAGCAGATTTTTCTACAAGTCCGCGGTCTGGTTCCTAGGAAGGCAAGTTCACAGTAACCTTGTAGTGAAATGCTTATGTTTCTCAAAGGGAACCTTGGTTTTAAAAGATTGAGAAATGCCGATTGAGTGTCATTGTCACTGTGGAAATCAGATTTCAGAAAGTTTTATCTTTTTTCTTGCATTTTCTCATTTTTTAAAAAGGGAAATTGCTTACAAAGCGTTTGCTTGTGGTCTAAAAGTTGAAGCTCTCATGATGACATTACCTGAAAGAAATATAATGCCAATTGGGAAAGGATACTCAGTTCTTTTGGAGATCTGAACTACACTTCCAGAATGTCCTCTCTAGATAGATTTCCCTATTAAGATCCCATTATTCACCACGCCATAACATTTAACTCTTCTT-AGGTATCTAACAGTCTAAATCAAATCATTGGATTACTAGGAAGGAAATTAGAAACCATCTATTCCAAGCCCTCTCCCATTATAATAGATGAGATTATTGAGACCCACAGAAATGAAATAACTCACCAAAGGCCACACCAGTCATTGGCAGAACTTGAACTATAACATAGACTTCTGACTCCTTGTGTATTGATATATCTATTTTATCACTCTACCTGTGATGTATATGAATTGATACTAGGAGAAAACTTCCCCACAAAATATACTGATCTGAAGAATTAATAAATCTTTTTGCCAAAAGCTTTTAAAATAAATCATAGACCCCCGGGAAGCCATTGCCCTGATTGTGAGAACCTTTAGAAAGTCTTATTTTACTATAAACAGCTCTGTTCTCTTTCCTTGAGCCATTACAG   [4833]
P_hamadryas_18742          TTTCCTTTGCAGGGACATGGATGGAGTTGGAAGTCATTATCCTCAGCAATCTAATGCAGGAATTGAAAACCAAACACCACATGTTCTCACTTATAAATGGGAGCTGAATTATGAGAACACATGGACACATGGTGAGAAACAACAAACATTGGAGTCTGTTGGGGGCTGTTTGGTGAGAGAGAGCATCAGGAAGAATAGCTAACGGATGCTAGGCTGAATAACTAGGTGATGGGATGATCTTTTCAGCAAATGACCATGACACACATTTACCTCTGTCACAACCCTGCACATCCTGCACATGTATCCCTAAACTTAAAATAAAAGTTGAAGAAAAAAAAA-TGGAAAGAAAAACAAAGATCAAAGTATGTCTCTAAAGATATTCCTGATAATACAAATGGCACAATGTTATGACTAAAACTTCATCATATTCCTTTTTTACCTGGAGTCCAATTCAGAGGTCAATACTTTACTTCTGTCTCAATATCACATCTCAACTCCCATTTTTTCCTTACATCAGGCAACCCTACTCTCACTCCCCTCTTCTTCAAACTCCTACTGAATTTGTAGGCTGCACTGTGAGAAGGTAAGACTACAGAGCATAGGCACATATTAACAGAGCCTTAGGCATTTTTGCTTGTAAAGTCTCTCCCATGAACCACTCTCCCAAACTACAGCCATAATCTTTCTCCTTTCTGCTACTGAAGAAAATGTGGTCAAAGCAAGAATAATAAGGTTTTGGTCTAAGAAATCTGAACACCTAAGAGCTTAAAAGCAGGCAATCCAGCTTTCTATTTGAAATCCAACAGGAATCCCTTAAGCTTAATTAGGAATTTGGTCACTGAAAACTTTATTTTGTGGAAATAACTAAATGTTTTCTCACAATACAAATGTGTGGCAGGTCTTTAAATGTGATTCATTGGAGCTGAGTCCAAAACCTTACTAGATACTAGTACCATCTACCCCAAAGCAGCTGCTTTTTCCAACCAACTAGCTCAGCGTTGTGGTTTTCACAAAGTTACAGCCAAAGTGAGCTTATATTATTATGGCATCAGAATTTATATTAGTTTTCTAAGTCCCAGTGAAGAAATTTCCACATCCTGTCAGTAACTAGCTAAGTGCTATTCACATGTTACCTCTAATCTTTGTAAGAATTCTGAGTTAATTATTACTATAATCCTTTACAGATTAGAAAATGGAGTCTCAGCAGGAGTAAGTGACTTTCTGCAAGTCAGAGTTATTACGATTTTAACTGTAATAAGGCTTTTCATAAGCACAGAAAGCTGAAGTTATTTTTAACTGAATAACTTATTATATGGACAGAAACATATTTTAAAGTGGTATTTCTGTGGATAAGACTGTTCCTCGGAGATAAAAAAAAAAAAAAAAAAGCTATTGTTTTCGGTTCTAGTTCTAGCAGTTTTATGTATACACACTATGCATATAAGGCAAATTGCCGCCCACAAGGTGTCAGGATAGGGTTATATCAAAACTAACGTTCTTTATGGAGTTGTGCTTATGAATTCAAATTATAACAAATCTGCAGATAGAAGTACTGGAAGAATTTCCTTACAACAGGAATGATCTGAGTAGGACAAGACTTGCTGTAAGATAGAGAAGACTCAAAAGAAGTAGAATTTTTAGAAAAGTGTACTGGATTTGTAGCTAAGATACTTGGATATTGGTAATATTTAAATACTCTTTGTGCTGCTCTGATATGCTCTTTCCCTTCTGTGAGTTTCATTTCCTCATTATTAAAATAATATGATTTAAACTAGATGACCTTTAACTCCCTTCTAGCTCTCATTTGGCATGATTTCATGAGCATTCCCCCTCCGAACCCTGCCCCTAACTAATACCATCACCACTGCGA-TGCTGCCACTTATGCAGCTGGTACCAACTCCATAAATCTTCGCTCTCAATCTTCCCCGTCTTTTCACCACTCATCAGTAAGTCACTGGCACCACTAAGTAAACATGTTTATCAAATTTACTTCTCCATTTTACTTGATGCTGAGGCCTGTCTGTGGGCTTGTCATCCTGGGAGGAGAAGAAATAATTAAACAGAAAAAAAAGTTGCTGATGGGGGCCCCTCCCACTCTCTAGAGGACAACTTTTAAATGTCATCTGGGAACTTAACTTGCTTTGCCTCATCTTACATTTTTCTTTTATTTTTAACCACTAAATTTCACATGAATTATCCAAAACAATCTGATCTCCATGACCCCGGTGTTCTTCATTCAGCCGCTTACAACCAGAACCAAAGAGTAGCAGCTAGAATTGGAAACTCTGCTGTTTCCTGAATAAATCTATATCAACTCCAAATAAGCCTGTTTGACATCCAAAACACACAAATTTGGACACATTCTGCAAGTATAGACATTTTCCTCTGTTAGGGGAAGTGAAAATTATTTTTATCCTTAAAATGAATTAAAGCAATTATGACCACTACCAAGCAACAACTTAAAGTTTGAATCTGAACTTTTACGCATGAATCTGTATTGGATTTTCAATCATTTAGGAAGGTGGCCTAATTAGATATCATTTTTGCAGTTGTTGCAGCATTTTATGGGTGGAAATAATCATGTTCTTTGGGAAGACCTGGTATCATATCATGTCTCAGTTGTTGGCTCTCTGGCCTGAAACAATTCACTTCATATCCCCGGGCTTCAGTTTCCTCTTTTGTAAAATTAGAATAGTTTCTGCCACATAATTTGTTTTAAACATTAAAGAAAAATGTGTGTGAAAATAATAATCTGAGTAAACAGAAAACCCCCAGAATGGGAGAAAATATTTGCAGACTATGCATCTGACAAAGGACTAGAAACTAGAATCTACAAGGAACTCAAACAAGTCAGCAATAGAAAAAGAAATAATCTCATTATAAAGTGCTCAAAGGACATAAATAGAGATTCCTCAAAAGAAGATATACAAATGCCCAACAAACATGAAAAAA-CGCTCGACATCACTAATCATCAGATAAATGCAAATTAAATCCAGAATAAAATAGCACCTTACTGCAAATAGCTATTATTAAAAAGTCAAGAAAAATAGATGCTGGTATGTATGTGGATAAAAGAAAATGCTTCTACACTGCTGGTGGGAATGTAAATTAATACAATTTCTATAGAAAACAGTATGGAGATTCCTTAAAGAGCTACAAGTAAATCTACCATTTGATACAGCAATCCTACTAATCACAATTGCAAAGATGTGTAATGAATCTATGTGCCAATTGACTAATGAGTGGATAAAGTAAACGTGGTATATATATA--CTATGGAATACTCCTCTGCCATAAAAAGGATCGCAGTAATGTATTTTGCAGTAACTTGGATGGAGCTGGAGTCCACTATTCTAAGTAAAATAATACAGGAGTGAAAAATAATAATAATAAAAAAATATGTTCCCACTTATAAGTGACAGATAAGCTACGATTATGCAAAGGCATACAGAGAGATATAATGGAATCTAGAGACTCAGAAGGGGGAGTGTGAGACAGGCTAGGCATAAAAGTATTACACATTGGGTACAATGTACACTACTCGGGTGATGGGTACACTAAAAATCTCAGAATTTACTGCTATATAATTTATCCATGCAACAGAATAAACACTTGTAGTTCAAGAAAATACTGAAATAAAAATT--AAAAAAAGAAAATGTGTGTAAAAGTACCTATTTTCATGTCTGATACCCAATAAGCATTAAAGAAATGTGAGTTCATTTCCTCTTTATTTGTACACAGAGTCATCTCCAAGGGCCTTTGGTTG-ATCCTATACATTTCTTAATTTAGAAAACCCCCTAAGAAGTGTAGTTGTAGCAGAGGACTAGAATATCTAGAGCAGTAATTTTTAAAGTGAAAGGGTAGAAAATAAGTGTTACTTGAAAAAACATATTCCTTATTTTAACAAATGTATTTGGAAAACAAAATAAAAAATGTCATTATTGTTTCTACAATAAAAACTATGAAAGTACAGATCTACAAAATCTTCTTAGCTGTTGGGAATTTAGTACTTGGAAAATGTCAATGTGATGGAGCAGATTTTTCTACAAGTCCAGGGTCTAGTTCCTAGGAAGGCAAGTTCACAGTAACCTTGTAGTGAAATGTTTATGTTTCTCAAAGGGAACCTTGGCTTTAAAAGATTGAGAAATGCCGATTGAGTGTCATTGTCACTCTGGAAATCAGATTTCAGAAAGTTTTATCTCTTTTCTTGCATTTTCTCATTTTTTAAAAAGGGAAATTGCTTACAAAGCATTTGCCTGTGGTCTAAAAGTTGAAGCTCTCATGATGACATTACCTGAAAGAAATATAATGCCAATTGGGAAAGGATACTCAGTTCTCTTGGAGATCTGAACTACACTTCCAGAATGTCCTCTCTAGATAGATTTCCCTATTAAGATTCCATTATTCACCACTCCATAACATTTAACTCTTCGT-AAGTATCTAACAGTCTAAATCAAATCATTGGATTACTAGGAAGGAAATTAGAAACCATCTATTCCAAGCCCTCTCCCATTATAATAGACGAGATTATTGAGACCCACAGAAATGAAATAACTCACCAAAAGCCACACCAGTCATTGGCAGAACTTGAACTATAACATAGACTTCTGACTCCTTGTGTATTGATATATCTATTTTATCACTCTACCTGTGATGTATATGAATTGATACTAGGAGAAAACTTCCCCACAAAATATACTGATCTGAAGAATAAATAAACCTTTTTGCCAAAAGCTTTTAAAATAAATCGTAGACCCCCAGAAAGCCATTGCCATGACTGTGAGAACTTTTAGAAAGTCTCATTTTACTATAAACAGCTCTGTTCTCTTTGCTTGAGCCATTACAG   [4844]
T_gelada_891096            TTTCCTTTGCAGGGACATGGATGGAGTTGGAAGTCATTATCCTCAGCAATCTAATGCAGGAATTGAAAACCAAACACCACATGTTCTCACTTATAAATGGGACCTGAATTATGAGAACACATGGACACATGGTGAGAAACAACAAACATTGGAGTCTGTTGGGGGCTGTTTGGTGAGAGAGAGCATCAGGAAGAATAGCTAACGGATGCTAGGCTGAATAATTAGGTGATGGGATGATCTTTTCAGCAAATGACCATGACACACATCTACCTCTGTCACAACCCTGCACATCCTGCACATGTATCCCTAAACTTAAAATAAAAGTTGAAGAAAAAAAAA-TGGAAAGAAAAACAAAGATCAAAGTATGTCTCTAAAGATATTCCTGATAATACAAATGGCACAATGTTATGACTAAAACTTCATCATATTCCTTTTTTACCTGGAGCCCAATTCAGAGGTCAATACTTTACTTCTGTCTCAATATCACATCTCAACTCCCATTTTTTCCTTACATCAGGCAACCCTACTCTCACTCCCCTCTTCTTCAAACTCCTACTGAATTTGTAGGCTGCACTGTGAGAAGGTAAGACTACAGAGCATAGGCACATATTAACAGAGCCTTAGGCATTTTTGCTTGTAAAGTCTCTCCCATGAACCACTCTCCCAAACTACAGCCATAATCTTTCTCCTTTCTGCTACTGAAGAAAATGTGGTCAAAGCAAGAATAATAAGGTTTTGGTCTAAGAAATCTGAACACCTAAGAGCTTAAAAGCAGGCAATCCAGCTTTCTATTTGAAATCCAACAGGAATCCCTTAAGCTTAATTAGGAATTTGGTCACTGAAAACTTTATTTTGTGGAAATAACTAAATGTTTTCTCACAATACAAGTGTGTGGCAGGTCTTTAAATGTGATTCATTGGAGCTGAGTCCAAAACCTTACTAGATACTAGTACCATCTACCCCAAAGCAGCTGCTTTTTCCAACCAACTAGCTCAGCGTTGTGGTTTTCACAAAGTTACAGCCAAAGTGAGCTTATATTATTATGGCATCAGAATTTATATTAGTTTTCTAAGTCCCAGTGAAGAAATTTCCACATCCTGTCAGTAACTAGCTAAGTGCTATTCACATGTTACCTCTAATCTTTGTAAGAATTCTGAGTTAATTATTACTATAATCCTTTACAGATTAGAAAATGGAGTCTCAGCAGGAGTAAGTGACTTTCTGCAAGTCAGAGTTATTACGATTTTAACTGTAATAAGGCTTTTCATAAGCACAGAAAGCTGAAGTTATTTTTAACTGAATAACTTATTATATGGACAGAAACATATTTTAAAGTGGTATTTCTGTGGATAAGACTGTTCCTCGGAGATTAAAAAAAAAAA------GCTATTGTTTTCGGTTCTAGTTCTAGCAGTTTTATGTATACACACTATGCATATAAGGCAAATTGCCGCCCACAAGGTGTCAGGATAGGGTTATATCAAAACTAACGTTCTTTATGGAGTTGTGCTTATGAATTCAAATTATAACAAATCTGCAGATAGAAGTACTGGAAGAATTTCCTTACAACAGGAATGATCTGAGTAGGACAAGACTTGCTGTAAGATAGAGAAGACTCAAAAGCAGTAGAATTTTTAGAAAAGTGTACTGGATTTGTAGCTAAGATACTTGGATATTGGTAATATTTAAATACTCTTTGTGCTGCTCTGATATGCTCTTTCCCTTCTGTGAGTTTCATTTCCTCATTATTAAAATAATATGATTTAAACTAGATGACCTTTAACTCCCTTCTAGCTCTCATTTGGCATGATTTCATGAGCATTCCCCCTCTGAACCCTGCCCCTAACTAATACCATCACCACTGCGA-TGCTGCCACTTATGCAGCTGGTACCAACTCCATAA-TCTTCGCTCTCAATCTTCCCCGTCTTTTCACCACTCATCAGTAAGTCACTGGCACCACTAAGTAAACATGTTTATCAAATTTACTTCTCCATTTTACTTGATGCTGAGGCCTGTCTGTGGGCTTGTCATCCTGGGAGGAGAAGAAATAATTAAACAGAAAAAAAAGTTGCTGATGGGGGCCCCTCCCACTCTCTAGAGGACAACTTTTAAATGTCATCTGGGAACTTAACTTGCTTTGCCTCATCTTACATTTTTCTTTTATTTTTAACCACTAAATTTCACATGAATTATCCAAAACAATCTGATCTCCATGACCCCGGTGTTCTTCATTCAGCCACTTACAACCAGAACCAAAGAGTAGCAGCTAGAATTGAAAACTCTGCTGTTTCCTGAATAAATCTATATCAACTCCAAATAAGCCTGTTTGACATCCAAAACACACAAATTTGGACACATTCTGCAAGTATAGACATTTTCCTCTGTTAGGGGAAGTGAAAATTATTTTTATCCTTAAAATGAATTAAAGCAATTATGACCACTACCAAGCAACAACTTAAAGTTTGAATCTGAACTTTTACGCATGAATCTGTATTGGATTTTCAATCATTTAGGAAGGTGGCCTAATTAGATATCATTTTTGCAGTTGTTGCAGCATTTTATGGGTGGAAATAATCATGTTCTTTGGGAAGACCTGGTATCATATCATGTCTCAGTTGTTGGCTCTCTGGCCTGAAACAATTCACTTCATATCCCCGGGCTTCAGTTTCCTCTTTTGTAAAATTAGAATAGTTTCTGCCACATAATTTGTTTTAAACATTAAAGAAAAATGTGTGTGAAAATAATAATCTGAGTAAACAGAAAACCCCCAGAATGGGAGAAAATATTTGCAGACTATGCATCTGACAAAGGACTAGAAACTAGAATCTACAAGGAACTCAAACAAGTCAGCAATAGAAAAAGAAATAATCTCATTATAAAGTGCTCAAAGGACATAAATAGAGATTCCTCAAAAGAAGATATACAAATGCCCAACAAACATGAAAAAA-TGCTCGACATCACTAATCATCAGATAAATGCAAATTAAATCCAGAATAAAATAGCACCTTACTGCAAATCGCTATTATTAAAAAGTCAAGAAAAATAGATGCTGGTATGTATGTGGATAAAAGAAAATGCTTCTACACTGCTGGTGGGAATGTAAATTAATACAATTTCTATAGAAAACAGTATGGAGATTCCTTAAAGAGCTACAAGTAAATCTACCATTTGATACAGCAATCCTACTAATCACAATTGCAAAGATGTGTAATGAATCTATGTGCCAATTGACTAATGAGTGGATAAAGTAAACGTGGTATATATATA--CTATGGAATACTCCTCTGCCATAAAAAGGATCGCAGTAATGTATTTTGCAGTAACTTGGATGGAGCTGGAGTCCACTAGTCTAAGTAAAATAATACAGGAGTGAAAAATAATAATA---AAAAAATATGTTCCCACTTATAAGTGACAGATAAGCTACGATTATGCAAAGGCATACAGAGTGATATAATGGAATCTAGAGACTCAGAAGGGGGAGTGTGAGACAGGCTAGGCATAAAAGTATTACACATTGGGTACAATGTACACTACTCGGGTGATGGGTACACTAAAAATCTCAGAATTTACTGCTATATAATTTATCCATGCAACAGAATAAACACTTGTAGTTCAAGAAAATACTGAAATAAAAATT--AAAAAAAGAAAATGTGTGTAAAAGTACCTATTTTCATGTCTGATACCCAATAAGCATTAAAGAAATGTGAGTTCATTTCCTCTTTATTTGTACACAGAGTCATCTCCAAGGGCCTTTGGTTGGATCCTATACATTTCTTAATTTAGAAAACCCCCTAAGAAGTGTAGTTGTAGCAGAGGACTAGAATATCTAGAGCAGTAATTTTTAAAGTGAAAGGGTAGAAAATAAGTGTTACTTGAAAAAACATATTCCTTATTATAACAAATGTATTTGGAAAACAAAATAAAAAATGTCATTATTGTTTCTACAATAAAAACTATGAAAGTACAGATCTACAAAATCTTCTTAGCTGTTGGGAATTTAGTACTTGGAAAATGTCAATGTGATGGAGCAGATTTTTCTACAAGTCCAGGGTCTGGTTCCTAGGAAGGCAAGTTCACAGTAACCTTGTAGTGAAATGTTTATGTTTCTCAAAGGGAACCTTGCCTTTAAAAGATTGAGAAATGCCGATTGAGTGTCATTGTCACTCTGGAAATCAGATTTCAGAAAGTTTTATCTTTTTTCTTGCATTTTCTCATTTTTTAAAAAGGGAAATTGCTTACAAAGCATTTGCCTGTGGTCTAAAAGTTGAAGCTCTCATGATGACATTACCTGAAAGAAATATAATGCCAATTGGGAAAGGATACTCAGTTCTCTTGGAGATCTGAACTACACTTCCAGAATGTCCTCTCTAGATAGATTTCCCTATTAAGATTCCATTATTCACCACTCCATAACATTTAACTCTTCGT-AAGTATCTAACAGTCTAAATCAAATCATTGGATTACTAGGAAGGAAATTAGAAACCATCTATTCCAAGCCCTCTCCCATTATAATAGATGAGATTATTGAGACCCACAGAAATGAAATAACTCACCAAAAGCCACACCAGTCATTGGCAGAACTTGAACTATAACATAGACTTCTGACTCCTTGTGTATTGATATATCTATTTTATCACTCTACCTGTGATGTATATGAATTGATACTAGGAGAAAACTTCCCCACAAAATATACTGATCTGAAGAATAAATAAACCTTTTTGCCAAAAGCTTTTAAAATAAATCATAGACCCCCAGAAAGCCATTGCCATGACTGTGAGAACTTTTAGAAAGTCTCATTTTACTATAAACAGCTCTGTTCTCTTTGCTTGAGCCATTACAG   [4835]
C_preussi_008_B            TTTCCTTTGCAGGGACATGGATGGAGTTGGAAGTCATTATCCTCAGCAATCTAATGCAGGAATTGAAAACCAAACACCACATGTTCTCACTTATAAATGGGAGCTGAATTATGAGAACACATGGACACATGGTGAGAAACAACAAACATTGGAGTCTGTTGGGGGCTGTTTGGTGAGAGATAGCATCAGGAAGAATAGCTAATGGATGCTGGGCTGAATAATTAGGTGATGGGATGATCTTTTCAGCAAATGACCATGACACACATTTACCTCTGTCACAACCTTGCACATCCTGCACATGTATCCCTAAACTTAAAGTAAAAGTTGAAGAAAAAAAAA-TGTAAAGAAAAACAAAGATCAAAGTATGTCTCTAAAGATATTCCTGATAATAAAAATGGCACAATGTTATGACTAAAACTTCATCATATTCCTTTTTTACCTGGAGCCCAATTCAGAGGTCAATA-----CTTCTGTCTCAATATCGCATCTCAACTCCCATTTTTTCCTTACATCAGGCAACCCTACTCTCACTCCCCTCTTCTTCAAACTCCTACTGAATTTGTAGGCTGCACTGTGAGAAGGTAAGACTACAGAGCATAGGCACATATTAACAGAGCCTTAGGCATTTTTGCTTGTAAAGTCTCTCCCATGAACCACTCTCCCAAACAACAGCCATAATCTTTCTCCTTTCTGCTACTGAAGAAAATGTGGTCAAAGCAAGAATAATAAGGTTTTGGTCTAAGAAATCTGAACACCTAAGAGCTTAAAAGCAGGCAATCCAGCTTTCTATTTGAAATCCAACAGGAATCCCTTAAGCTTAATTAGGAATTTGGTCACTGAAAACTTTATTTTATGGAAATAACTAAATGTTTTCTCACAATACAAATGTGTGGCAGGTCTTTAAATGTGATTCATTGGAGCTGAGTCCAAAACCTTACTAGATACTAGTACCATCTACCCCAAAGCAGCTGCTCTTTCCAACCAACTAGTTCAGCGTTGTGGTTTTCACAAAGTTACAGCCAAAGTGAGCTTATATTATTATGGCATCAGAATTTATATTAGTTTTCTAAGTCCCAGTGAAGAAATTTCCACATCCTGTCAGTAACTAGCTAAGTGCTATTCACATGTTACCTCTAATCTTTGTAAGAATTCTGAGTTAATTATTACTATAATCCTTTACAGATTAGAAAATGGAGTCTCAGCAGGAGTAAGTGACTTTCTGCAAGTCAGAGTTATTATGATTTTAACTGCAATAAGGCTTTTCATAAGCAC-GAAAGTTGAAGTTATTTTTAACTGAATAACTTATTATATGGACAGAAACATATTTTAAAGTGGTATTTCTGTGGATAAGACTGTTCCTCGGAGATAAAAAAAAAAA-------GCTATTGTTTTCAGTTCTAGTTCTAGCAGTTTTATGCATGCGCACTACGCATATAAGGCAAATTGCCGCCCACAAGGTGTCAGGATAGGGTTATATCAAAACTAACGTTCTTTATGGAGTTGTGTTTATGAATTCAAATTATAACAAATCTGCAGATAGAAGTACTGGAAGAATTTCTTTACAACCGGAATGATCTGAGTGGGACAAGACTTGCTGTAACATAGAGAAGACTCAAAAGCAGTAGAATTTTTAGAAAAGTGTACTGAATTTGTAGCTAAGATACTTGGATATCGGTAATATTTAAATATTCTTTCTGCTGCTCTGATATGCTCTTTCCCTTCTGTGAGTTTCATTTCCTCATTATTAAAATAATATGATTTAAACTAGATGACCTTTAACTCCCTTCTAGCTCTCATTTGGCATGATTTCATGAGCATTCCCCCTCTGAACCCTGCCCCTAACTAATACCATCACCATTGCGACTGCTGCCACTTATGCAGCTGGTACCAACTCCATAAATCTTCACTCTCAATCTTCCCCGTCTTTTCACCACTCATCAGTAAGTCACTGGCACCACTAAGTAAACATGTTTATCAAATTTACTTCTCCATTTTATTTGATGCTGAAGCCTGTCTGTGGGCTTGTCATCCTGGGAGGAGAAGAAATAATTAAACAGAAAAAAA-GTTGCTGATGGGGGCCCCTCCCACTCTCCAGAGGACAACTTTTAAATGTCATCTGGGAACTTAACTTGCTTTGCCTCATCTTACATTTTTCTTTTGTTTTTAACCACTAAATTTCACATGAATTATCCAAAACAATCTGATCTCCATGACCCTGGTGTTCTTCATTCAGCCGCTTACAACCAGAACCAAAGAGTAGCAGCTAGAATTGGAAACTCTGCTGTTTCCTGAATAAATCTATATCAACTCCAAATAAGCCTGTTTGACATCCAAAACACACAAATTTGGACACATTCTGCAAGTATAGACATTTTCCTCTGTTAGGGGAAGTGAAAATTATTTTTATCCTTAAAATGAATTAAAGCAATT-AGACCACTACCAAGCAACAACTTAAAGTTTGAATCTGAACTTTTACGCATGAATCTGTATTGGATTTTTAATCATTTAGGAAGGTGGCCTAATTAGATATAATTTTTGCAGTTGTTGCAGCATTTTATGGGTGAAAATAATCATGTTCTTTGGGAAGACCTGGTATCATATCATGTCTCAGTTGTTGGCTCTCTGGCCTGAAACAATTCACTTCATATCCCCGGGCTTCAGTTTCCTCTTTTGTAAAATTAGAATAGTTTCTGCCACATAATTTGTTTTAAACATTAAAGAAAAATGTGTGTGAAAATAATAATCTGAGTAAACAGAAAACCCCCAGAATGGGAGAAAATATTTGCAGACTATGCGTCTGACAAAGGACTAGAAACTAGAATCTACAAAGAACGCAAACAAGTCAACAATAGAAAAAGAAATATTCTCGTTATAAAGTGCTCAAAGGACATAAATAGACATTCCTCAAAAGAAGATATACAAATGGCCAACAACCATGAAAAAA-TGCTCGACATCACTAATGATCAGATAAATGCAAATTAAATCCAGAATAAAATAGCACCTTACTGCAAATGGCTATTATTAAAAAGTCAAGAAAAATAGATGCTGGTATGTATGTGGATAAAAGAGAATACTTCTACACTGCTGGTGGGAATGTAAATTAATACAATTTCTATAGAAAACAGTATGGAGATTCCTTAAAGAGCTACAAGTAAATCTACCATTTGATACAGCAATCCTACTAATCACAATTGCAAAGATGTGTAATGAATCTATGTGCCAATTGACTAATGAGTGGATAAAGTAAACGTGGTATATATATA--CTATGGAATACTCCTCTGCCATAAAAAGGATCGCAGTAATGTATTTTGCAGTAACTTGGATGGAGCTGGAGTCCACTATTCTAAGTAAAATAACACAGGAGTGAAAAATAATAATA---CAAAAAGATGTTCCCAATTATAAGTGACAGATAAGCTACGATTATGCAAAGGTATACAGAGTGATATAATGGAATCTAGAGACTCAGAAGGGGGAGGGTGAGACAGGCTAGGCATAAAAGTATTACACATTGGGTACAATGTTCACTACTCAGGTGATGGGTACACTAAAAATCTCAGAGTTTACTGCTATATAATTTATCCGTGCAACAGAATAAACACTTGCAGTTCAAGAAAATACTGAAATAAAAATT--AAAAAAAGAAAATGTGTGTAAAAGTACCTATTTTCATGTCTGATACCCAGTAAGCATTAAATAAATGTGAGTTCATTTCCTCTTTATTTGTACACAGAGTCATCTCCAAGGGCCTTTGGTTGGATCCTATACATTTCTTAATTTAGAAAATCCCCTAAGAAGTGTAGTTGTAGCAGAGGACTAGAATATCTAGAGCAGTAATTTTTAAAGTGAAAGGGTAGAAAATAAGTGTTATTTGAAAAAACATATTCCTTATTATAACAAATATATTTGGAAAACAAAATAAAAAATGTCATTATTGTTTCTACAATAAAAACTGTGAAAGTACAGATCTACAAAATCTTCTTAGCTGTTGGGCATTTAGTACTTGGAAAATGTCAATGTGATGGAGCAGATTTTTCTACAAGTCCAGGGTCTGGTTCCTAGGAAGGCAAGTTCACAGTAACCTTGTAGTGAAATGTTTATGTTTCTCATTGGGAACCTTGGTTTTAAAAGATTGAGAAATGCCAACTGAGTGTCATTGTCACGGTGGAAATCAGATTTCAGAAAGTTTTATCTTTTTTCTTGCATTTTCTCATTTTTTGAAAAGGGAAATTGCTTACAAAGCATTTGTCTGTGGTCTAAAAGTTGAAGCTCTCATGATGATATTACCTGAAAGAAACATAATGCCAATTGGGAAAAGATACTCAGTTCTCTTGGAGATCTGAACTACACTTCCAGAATGTCCTCTCTAGATAGATTTCCCTGTTAAGATTCCATTATTCACCAGTCCATAATATTTAACTCTTCGT-AGGTATCTAACAGTCTAAATCAAATCATTGCATTACTAGGAAGGAAATTAGAAACCATCTATTCCAAGTCCTCTCCCATTATAATAGACAAGATTATTGAGACCCACAGAAGTGAAATAACTCACCAAAGGCCACACCAGTCATTGGCAGAACTTGAACTATAATATAGACTTCTGACTCCTTGTGTATTGATATATCTATTTTATCACTCTACCTGTGATGTATATGAATTGATACTAGGAGAAAACTTCCCCACAAAATATACTGATCTGAAGAATAAATAAACCTTTTTGCCAAAAGCTTTTAAAATAAATCATAGACCCCCAGGAAGCGATTGCCATGACTGTGAGAACTTTTAGAAAGTCTCATTTTACTATAAACAGCTCTGTTCTCTTTGCTTGAGCCATTACAG   [4828]
;
END;


BEGIN CODONS;
	CODONPOSSET * CodonPositions = 
		N: 1-4853;
	CODESET  * UNTITLED = Universal: all ;
END;


BEGIN ASSUMPTIONS;
	OPTIONS  DEFTYPE=unord PolyTcount=MINSTEPS ;
END;

BEGIN PAUP;
Lset  Base=(0.3418 0.1812 0.1712)  Nst=6  Rmat=(1.0000 4.6383 1.0000 1.0000 6.5160)  Rates=gamma  Shape=0.9416  Pinvar=0;
END;

BEGIN MRBAYES;

	
	outgroup Tobscurus;

	unlink shape=(all) pinvar=(all) statefreq=(all) revmat=(all);
	prset applyto=(all) ratepr=variable;
	lset applyto=(all) nst=6  rates=gamma;
	
	set autoclose = yes;
	mcmc ngen=1000000 printfreq=100 samplefreq=100 nchains=4 nruns=2 savebrlens=yes;
	sumt burnin=2500;
	sump burnin=2500;
END;
