# Supplementary material for: Lesula: A New Species of Cercopithecus Monkey Endemic to the Democratic Republic of Congo and Implications for Conservation of Congo’s Central Basin
Source: PubMed Central journal article supplement (PMC3440422; doi:10.1371/journal.pone.0044271), 2012-09-12
Supplement: pone.0044271.s004.pdf [file pone.0044271.s004.pdf]

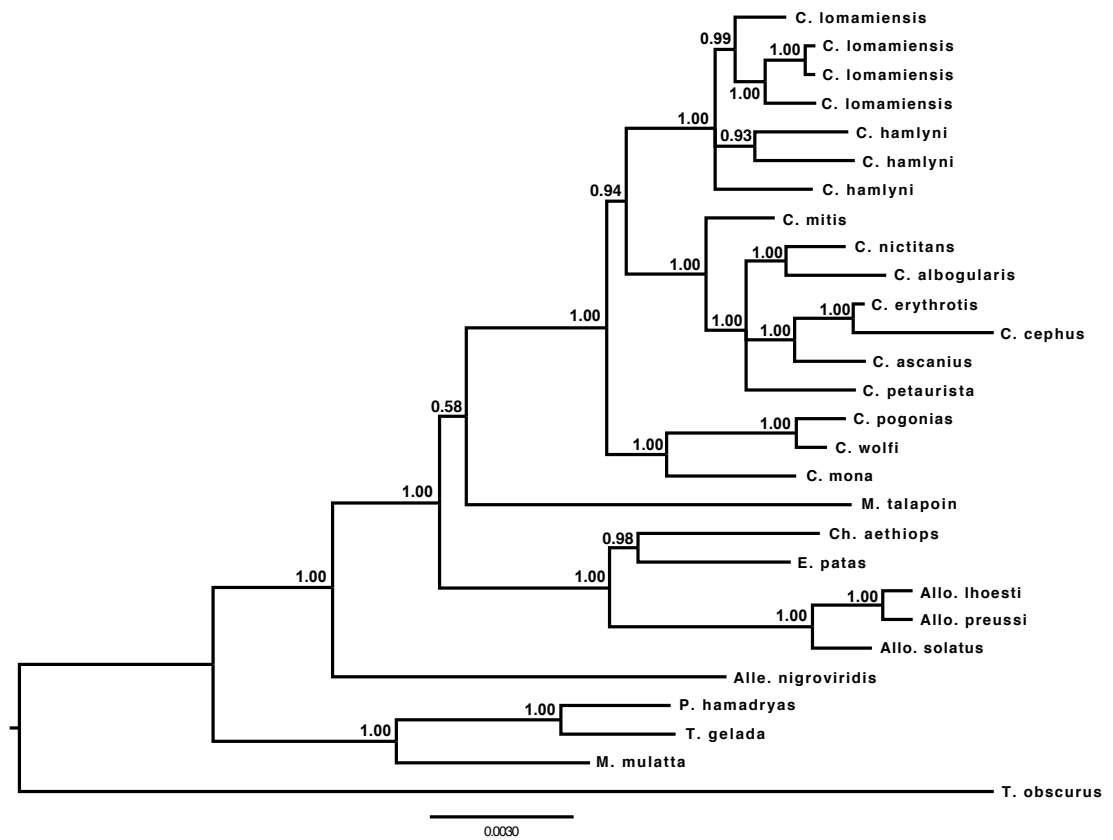

**Fig. S4.** Bayesian tree, Xq13.3 homolog. The scale at the bottom is in units of nucleotide substitutions per site.
