# Supplementary material for: Lesula: A New Species of Cercopithecus Monkey Endemic to the Democratic Republic of Congo and Implications for Conservation of Congo’s Central Basin
Source: PubMed Central journal article supplement (PMC3440422; doi:10.1371/journal.pone.0044271), 2012-09-12
Supplement: pone.0044271.s005.pdf [file pone.0044271.s005.pdf]

**Table S1.** Specimens of *Cercopithecus lomamiensis* and *Cercopithecus hamlyni* examined for this study.

| Specimen ID | Species            | Sex | Age      | Provenance of specimen |           | Standard measures (cm) |      |           |     |           | Material analyzed |       |        |                            |
|-------------|--------------------|-----|----------|------------------------|-----------|------------------------|------|-----------|-----|-----------|-------------------|-------|--------|----------------------------|
|             |                    |     |          | Latitude               | Longitude | Total length           | Tail | Hind foot | Ear | Mass (kg) | Skin              | Skull | Tissue | Provenance and note        |
| YPM 14080   | <i>lomamiensis</i> | M   | Adult    | S1.02237               | E24.42368 | 125                    | 65   | 14.0      | 4.0 | 4.0       | +                 | +     | +      | Hunter kill, Type specimen |
| YPM 14189   | <i>lomamiensis</i> | F   | Subadult | S1.06571               | E24.44838 | 105                    | 62.5 | 13.4      | 4.2 | 3.5       | +                 | +     |        | Hunter kill                |
| YPM 14190   | <i>lomamiensis</i> | F   | Subadult | S1.42801               | E25.01601 | 110                    | 60   | 13.5      | 2.8 |           | +                 | +     |        | Hunter kill                |
| YPM 14191   | <i>lomamiensis</i> | M   | Adult    | S1.38145               | E25.03843 | 125                    | 78   | 16.5      | 3.4 | 7.1       | +                 | +     | +      | Hunter kill                |
| YPM 14192   | <i>lomamiensis</i> | F   | Subadult | S1.40129               | E24.97498 | 87                     | 47   | 13.5      | 3.2 | 4.0       | +                 | +     |        | Eagle kill                 |
| GP 600      | <i>lomamiensis</i> | M   | Juvenile | S1.06571               | E24.44838 |                        |      |           |     |           |                   |       | +      | Captive                    |
| JH 005      | <i>lomamiensis</i> | M   | Adult    | S1.50401               | E24.93501 |                        |      |           |     |           | +                 |       | +      | Hunter kill                |
| YPM 14193   | <i>hamlyni</i>     | M   | Subadult | N1.34005               | E28.65038 |                        |      |           |     |           |                   | +     |        | Leopard kill               |
| YPM 14194   | <i>hamlyni</i>     | M   | Adult    | N1.34005               | E28.65038 |                        |      |           |     |           |                   | +     |        |                            |
| YPM 14195   | <i>hamlyni</i>     | M   | Adult    | N1.34005               | E28.65038 |                        |      |           |     |           |                   | +     |        | Leopard kill               |
| AMNH90028   | <i>hamlyni</i>     | M   | Adult    | S2.31716               | E28.73163 |                        |      |           |     |           | +                 |       |        | Mt. Kahuzi                 |
| YPM 17272   | <i>hamlyni</i>     | M   | Adult    | N0.77249               | E25.25894 | 123                    | 75   | 10.2      | 3.8 | 12.5      |                   | +     | +      |                            |
| ME 404      | <i>hamlyni</i>     | M   | Adult    | N0.77249               | E25.25894 |                        |      |           |     |           |                   |       | +      |                            |
| AMNH 86948  | <i>hamlyni</i>     | M   | Adult    | S1.48988               | E29.43844 |                        |      |           |     |           |                   | +     |        | Mt. Karisimbi              |
| AMNH 81000  | <i>hamlyni</i>     | F   | Adult    | S1.95496               | E28.86263 |                        |      |           |     |           |                   | +     |        | Lake Kivu region           |

**Notes:** Abbreviations are as follows: YPM = Yale Peabody Museum; AMNH = American Museum of Natural History; GP = Gilbert Paluku, collector; JH = John Hart, collector; ME = Maurice Emetshu, collector. Empty cells = data unavailable.
