# Supplementary material for: Lesula: A New Species of Cercopithecus Monkey Endemic to the Democratic Republic of Congo and Implications for Conservation of Congo’s Central Basin
Source: PubMed Central journal article supplement (PMC3440422; doi:10.1371/journal.pone.0044271), 2012-09-12
Supplement: pone.0044271.s007.pdf [file pone.0044271.s007.pdf]

**Table S3.** Selected cranial measurements of *Cercopithecus lomamiensis* (to the nearest tenth of a millimeter).

| Specimen ID | Age/Sex         | Pr-In           | Pr-Ba | Na-Ba | Gl-In           | Br-Ba | Min. Frontal Breadth | Po-Po | Gl-Br | La-In | Op-In | Na-Pr | Na-Rh | Zy-Zy | Max Orbital Height | Max Orbital Width |
|-------------|-----------------|-----------------|-------|-------|-----------------|-------|----------------------|-------|-------|-------|-------|-------|-------|-------|--------------------|-------------------|
| YPM 14080   | Adult male      | 113.4           | 78.2  | 59.1  | 79.2            | 51.5  | 45.7                 | 59.3  | 44.6  | 17    | 23.5  | 54    | 26.6  | 71    | 25.6               | 24.7              |
| YPM 14189   | Subadult female | 97.1            | 66.6  | 54    | 72              | 48.8  | 44.8                 | 54.2  | 41.9  | 16.2  | 20.1  | 42.5  | 22.8  | 61.4  | 23.9               | 22.8              |
| YPM 14190   | Subadult female | 91.0 (estimate) | X     | X     | 68.0 (estimate) | X     | 42.7                 | 50.1  | 39.3  | X     | X     | 34.3  | 16.1  | 55.3  | 23.1               | 20.7              |
| YPM 14191   | Adult male      | 116.4           | 80.5  | 58.8  | 80.7            | 54.8  | 47.2                 | 60.9  | 42.8  | 12.1  | 24.4  | 52.6  | 22.3  | 71.4  | 22.9               | 24.9              |
| YPM 14192   | Subadult female | 94.5            | 62.6  | 51.9  | 71.8            | 48.2  | 43.6                 | 54.3  | 40.8  | 16.3  | 20.1  | 41.1  | 20.2  | 58.7  | 21.3               | 22.5              |

**Notes:** Pr=Prosthion, In=Inion, Ba=Basion, Na=Nasion, Gl=Glabella, Br=Bregma, Po=Porion, La=Lambda, Op=Opisthion, Rh=Rhinion, Zy=Zygion. X = Measurement unavailable.
