# Supplementary material for: Lesula: A New Species of Cercopithecus Monkey Endemic to the Democratic Republic of Congo and Implications for Conservation of Congo’s Central Basin
Source: PubMed Central journal article supplement (PMC3440422; doi:10.1371/journal.pone.0044271), 2012-09-12
Supplement: pone.0044271.s009.pdf [file pone.0044271.s009.pdf]

**Table S5.** Cranial landmarks used in the 3-dimensional comparative analysis of cranial morphology.

| Landmark Code | Description                                                                 |
|---------------|-----------------------------------------------------------------------------|
| 1             | Rhinion                                                                     |
| 2             | Nasion                                                                      |
| 3             | Postorbital sulcus/depression in the midline                                |
| 4             | Bregma                                                                      |
| 5             | Medial orbit border                                                         |
| 6             | Lateral orbit border                                                        |
| 7             | Orbitale superior                                                           |
| 8             | Orbitale inferior                                                           |
| 9*            | "Pterion" (most anterior point on the braincase in the infratemporal fossa) |
| 10*           | Zygion                                                                      |
| 11*           | Ectomolare                                                                  |
| 12*           | Euryon                                                                      |
| 13*           | Prosthion                                                                   |
| 14            | Lambda                                                                      |
| 15            | Inion                                                                       |
| 16            | Opisthion                                                                   |
| 17            | Basion                                                                      |
| 18            | Sphenobasion                                                                |
| 19            | Alveolon                                                                    |
| 20            | Porion                                                                      |
| 21            | Petrous apex                                                                |
| 22            | Carotid canal                                                               |
| 23            | Most anterior point on jugular foramen                                      |

**Notes:** \* Indicates landmark collected in both superior and inferior views. The two sets of measurements were then combined using the program DVLR v. 0.4.9 [15] to obtain a single set of 23 three-dimensional coordinates for each cranium. Only individuals acquired in the wild were included in the analysis. *Cercopithecus hamlyni* specimens included: YPM 17272, YPM 14195, YPM 14194, YPM 14193, AMNH 86948, AMNH 90028, AMNH 81000. *Cercopithecus lomamiensis* specimens included: YPM 14189, YPM 14080, YPM 14191.
