# Supplementary material for: Lesula: A New Species of Cercopithecus Monkey Endemic to the Democratic Republic of Congo and Implications for Conservation of Congo’s Central Basin
Source: PubMed Central journal article supplement (PMC3440422; doi:10.1371/journal.pone.0044271), 2012-09-12
Supplement: pone.0044271.s012.pdf [file pone.0044271.s012.pdf]

**Table S8.** Parameters of boom calls of *Cercopithecus hamlyni* and *Cercopithecus lomamiensis*.

| PARAMETER                 | <i>C. hamlyni</i> (n=43) |                | <i>C. lomamiensis</i> (n=6) |              | t-test |                    |
|---------------------------|--------------------------|----------------|-----------------------------|--------------|--------|--------------------|
|                           | Mean $\pm$ SD            | Range          | Mean $\pm$ SD               | Range        | t      | p                  |
| Start Freq (Hz)           | 204.8 $\pm$ 17.5         | 172 – 247      | 215 $\pm$ 9.8               | 204 – 226    | -2.11  | 0.061              |
| End Freq (Hz)             | 188.4 $\pm$ 14.9         | 161 – 215      | 197.8 $\pm$ 8.9             | 193 – 215    | -2.90  | 0.054              |
| Low freq (Hz)             | 173.6 $\pm$ 16.3         | 147 – 210      | 181.9 $\pm$ 10.4            | 172 – 201    | -1.68  | 0.127              |
| High freq (Hz)            | 220.8 $\pm$ 16.9         | 189 – 162      | 234.3 $\pm$ 9.7             | 220 – 246    | -2.85  | 0.017 <sup>s</sup> |
| Q1 freq (Hz)              | 190.0 $\pm$ 16.1         | 162 – 226      | 199.2 $\pm$ 9.0             | 194 – 215    | -2.07  | 0.065              |
| Q3 Freq (Hz)              | 204.6 $\pm$ 15.4         | 172 – 237      | 213.5 $\pm$ 8.1             | 205 – 226    | -2.21  | 0.049 <sup>s</sup> |
| Center Freq (Hz)          | 197.1 $\pm$ 15.3         | 172 – 237      | 204.6 $\pm$ 9.6             | 194 – 215    | -1.64  | 0.134              |
| IQR bandwidth (Hz)        | 14.5 $\pm$ 5.7           | 10.8 – 32.3    | 14.4 $\pm$ 5.5              | 11 – 22      | 0.07   | 0.946              |
| IQR Dur (secs)            | 0.15 $\pm$ 0.05          | 0.1 – 0.2      | 0.13 $\pm$ 0.05             | 0.1 – 0.2    | 0.69   | 0.514              |
| Max Freq (Hz)             | 198.3 $\pm$ 15.5         | 172 – 237      | 204.6 $\pm$ 6.8             | 194 – 215    | -1.71  | 0.109              |
| Duration (secs)           | 0.37 $\pm$ 0.07          | 0.25 – 0.49    | 0.34 $\pm$ 0.06             | 0.22 – 0.39  | 1.24   | 0.254              |
| Slope: Total (Hz/sec)     | -45.0 $\pm$ 22.7         | -98.5 – 0.0    | -52.3 $\pm$ 28.12           | -105 – -29   | 0.61   | 0.563              |
| Slope: 1st quart (Hz/sec) | -166.2 $\pm$ 112.3       | -646.9 – -53.5 | -179.9 $\pm$ 78.8           | -315 – -91.5 | 0.38   | 0.717              |
| Slope: Middle (Hz/sec)    | 101.5 $\pm$ 54.2         | 36 – 216       | 87.2 $\pm$ 37.6             | 54 – 135     | 0.82   | 0.437              |
| Slope: 4th quart (Hz/sec) | -205.3 $\pm$ 164.4       | -921 – 0       | -306.5 $\pm$ 185.1          | -528 – -105  | 1.27   | 0.250              |
| Delta Freq (Hz)           | 47.2 $\pm$ 9.7           | 35.3 – 77.8    | 52.4 $\pm$ 9.37             | 39.5 – 65.4  | -1.28  | 0.245              |

**Note:** s = significant difference (p<0.05).
