# Supplementary material for: Lesula: A New Species of Cercopithecus Monkey Endemic to the Democratic Republic of Congo and Implications for Conservation of Congo’s Central Basin
Source: PLOS journal article supplement (doi:10.1371/journal.pone.0044271), 2012-09-12
Supplement: S13 (10.1371/journal.pone.0044271.s013) [file journal.pone.0044271.s013]

**Table S9.** Estimated divergence dates (million years ago) in Cercopithecoid lineages A) TSPY, B) Xq13.3 homolog. Constrained nodes are marked with \*.

| A. TSPY                                                                                                                                             | 95% confidence intervals |      |      |
|-----------------------------------------------------------------------------------------------------------------------------------------------------|--------------------------|------|------|
|                                                                                                                                                     | MEAN                     | MAX  | MIN  |
| SPLIT                                                                                                                                               |                          |      |      |
| Colobinae – Cercopithecinae *                                                                                                                       | 15.6                     | 20.3 | 10.9 |
| Papionini – Cercopithecini                                                                                                                          | 9.9                      | 14.2 | 7.1  |
| <i>Macaca</i> – Afro-papionins *                                                                                                                    | 7.7                      | 9.7  | 5.8  |
| <i>Papio</i> – <i>Theropithecus</i> *                                                                                                               | 4.7                      | 5.5  | 4.0  |
| terrestrials – rest of Cercopithecini                                                                                                               | 7.6                      | 12.6 | 5.1  |
| vervet – patas – <i>lhoesti</i> group                                                                                                               | 5.0                      | 8.4  | 2.0  |
| <i>lhoesti</i> group MRCA                                                                                                                           | 1.2                      | 2.3  | 0.2  |
| <i>Allochrocebus lhoesti</i> – <i>Allo. preussi</i>                                                                                                 | 0.5                      | 1.1  | 0.1  |
| <i>Allenopithecus</i> – <i>Miopithecus</i> /arboreals                                                                                               | 7.2                      | 11.7 | 4.5  |
| <i>Miopithecus</i> – arboreals                                                                                                                      | 6.8                      | 10.7 | 3.8  |
| <i>hamlyni</i> group – <i>mitis</i> group – <i>cephus</i> group – <i>mona</i> group                                                                 | 4.3                      | 7.3  | 2.2  |
| <i>mitis</i> group MRCA                                                                                                                             | 2.2                      | 4.4  | 0.8  |
| <i>cephus</i> group MRCA                                                                                                                            | 2.0                      | 3.2  | 0.5  |
| <i>Cercopithecus cephus</i> – <i>C. ascanius</i>                                                                                                    | 1.1                      | 1.7  | 0.2  |
| <i>C. petaurista</i> – <i>C. erythrogaster</i>                                                                                                      | 0.9                      | 1.6  | 0.2  |
| <i>mona</i> group MRCA                                                                                                                              | 2.4                      | 4.6  | 1.1  |
| <i>C. wolffi</i> – <i>C. pogonias</i>                                                                                                               | 1.6                      | 2.9  | 0.5  |
| <i>hamlyni</i> group MRCA                                                                                                                           | 1.7                      | 3.2  | 0.5  |
| <i>C. lomamiensis</i> MRCA                                                                                                                          | 0.5                      | 1.1  | 0.1  |
| <i>C. hamlyni</i> MRCA                                                                                                                              | 0.4                      | 0.7  | 0.1  |
|                                                                                                                                                     |                          |      |      |
| <b>B. Xq13.3 homolog</b>                                                                                                                            |                          |      |      |
| SPLIT                                                                                                                                               | MEAN                     | MAX  | MIN  |
| Colobinae – Cercopithecinae *                                                                                                                       | 16.5                     | 20.8 | 12.2 |
| Papionini – Cercopithecini                                                                                                                          | 12.2                     | 17.3 | 9.8  |
| <i>Macaca</i> – Afro-papionins *                                                                                                                    | 8.0                      | 9.8  | 6.3  |
| <i>Papio</i> – <i>Theropithecus</i> *                                                                                                               | 4.6                      | 5.2  | 4.0  |
| <i>Allenopithecus</i> – rest of Cercopithecini                                                                                                      | 9.9                      | 15.6 | 7.6  |
| terrestrials – <i>Miopithecus</i> /arboreals                                                                                                        | 8.8                      | 13.0 | 6.1  |
| terrestrials MRCA                                                                                                                                   | 5.5                      | 7.9  | 3.2  |
| vervet – patas                                                                                                                                      | 4.1                      | 6.7  | 2.3  |
| <i>lhoesti</i> group MRCA                                                                                                                           | 1.5                      | 3.1  | 0.7  |
| <i>Allochrocebus lhoesti</i> – <i>Allo. preussi</i>                                                                                                 | 0.6                      | 1.2  | 0.2  |
| <i>Miopithecus</i> – arboreals                                                                                                                      | 7.8                      | 12.1 | 5.5  |
| arboreals MRCA                                                                                                                                      | 4.9                      | 8.1  | 3.3  |
| <i>mona</i> group – <i>cephus</i> / <i>mitis</i> / <i>hamlyni</i> groups                                                                            | 4.8                      | 7.5  | 3.3  |
| <i>mona</i> group MRCA                                                                                                                              | 3.1                      | 6.1  | 2.1  |
| <i>Cercopithecus wolffi</i> – <i>C. pogonias</i>                                                                                                    | 0.7                      | 1.7  | 0.3  |
| <i>hamlyni</i> group – <i>mitis</i> / <i>cephus</i> group                                                                                           | 4.8                      | 7.4  | 3.3  |
| <i>C. mitis</i> – <i>C. ascanius</i> / <i>C. cephus</i> / <i>C. erythrotis</i> / <i>C. nictitans</i> / <i>C. albugularis</i> / <i>C. petaurista</i> | 3.4                      | 5.2  | 2.1  |
| <i>C. ascanius</i> / <i>C. cephus</i> / <i>C. erythrotis</i> – <i>C. nictitans</i> / <i>C. albugularis</i> – <i>C. petaurista</i>                   | 2.9                      | 4.3  | 1.6  |

**Table S9.** continued.

| <b>B. Xq13.3 homolog</b>                            |     | <b>95% confidence intervals</b> |     |     |
|-----------------------------------------------------|-----|---------------------------------|-----|-----|
|                                                     |     | MEAN                            | MAX | MIN |
| SPLIT                                               |     |                                 |     |     |
| <i>C. nictitans</i> – <i>C. albogularis</i>         | 1.8 | 2.9                             | 0.8 |     |
| <i>C. ascanius</i> – <i>C. cephus/C. erythrotis</i> | 2.0 | 3.2                             | 1.1 |     |
| <i>C. ascanius</i> – <i>C. cephus/C. erythrotis</i> | 2.0 | 3.2                             | 1.1 |     |
| <i>C. erythrotis</i> – <i>C. cephus</i>             | 1.4 | 2.0                             | 0.5 |     |
| <i>hamlyni</i> group MRCA                           | 2.8 | 4.3                             | 1.6 |     |
| <i>C. lomamiensis</i> MRCA                          | 1.9 | 4.0                             | 0.8 |     |
