# Supplementary material for: Lesula: A New Species of Cercopithecus Monkey Endemic to the Democratic Republic of Congo and Implications for Conservation of Congo’s Central Basin
Source: PLoS One. 2012 Sep 12;7(9):e44271. doi: 10.1371/journal.pone.0044271 (PMC3440422; doi:10.1371/journal.pone.0044271)
Supplement: Table S2 — Genetic samples list. (PDF) [file pone.0044271.s006.pdf]

**Table S2.** Genetic samples list.

| <b>Taxon</b>                                       | <b>Origin</b>                                           | <b>Sample ID</b> | <b>Source</b>                 | <b>GenBank #<br/>(TSPY, Xq13.3<br/>homolog)</b> |
|----------------------------------------------------|---------------------------------------------------------|------------------|-------------------------------|-------------------------------------------------|
| <i>Chlorocebus<br/>aethiops</i>                    | East Africa                                             | 90.017           | Dept.<br>Anthropology,<br>NYU | AY450873,<br>AY899216                           |
| <i>Cercopithecus<br/>albogularis</i>               | Africa                                                  | 89M009           | Cheyenne<br>Mountain Zoo      | EF517803,<br>AY899220                           |
| <i>Cercopithecus<br/>ascanius</i>                  | Central Africa                                          | 41137B           | Louisiana<br>Purchase Zoo     | EF517804,<br>AY899222                           |
| <i>Cercopithecus<br/>cephus</i>                    | Central Africa                                          | The.Zoo.1        | Gulf Breeze Zoo               | AY450874,<br>AY899223                           |
| <i>Cercopithecus<br/>erythrogaster<sup>a</sup></i> | West Africa                                             | Mulhouse3        | Mulhouse Zoo                  | AY665648,<br>-----                              |
| <i>Cercopithecus<br/>erythrotis<sup>b</sup></i>    | Bioko,<br>Equatorial<br>Guinea                          | 066-B            | CIRMF, Gabon                  | -----,<br>AY899225                              |
| <i>Cercopithecus<br/>hamlyni</i>                   | Central Africa                                          | OR.1646          | San Diego Zoo                 | AY450875,<br>AY899231                           |
| <i>Cercopithecus<br/>hamlyni</i>                   | Eastern<br>Democratic<br>Republic of the<br>Congo (DRC) | ME404            | Drs. J. and T.<br>Hart, TL2   | JN106053,<br>JN106059                           |
| <i>Cercopithecus<br/>hamlyni</i>                   | Eastern DRC                                             | GP612            | Drs. J. and T.<br>Hart, TL2   | JN106052,<br>JN106058                           |
| <i>Allochrocebus<br/>lhoesti</i>                   | Central Africa                                          | Antwerp          | Antwerp Zoo                   | AY048055,<br>AY899217                           |
| <i>Cercopithecus<br/>lomamiensis</i>               | Central Congo<br>Basin, DRC                             | GP600            | Drs. J. and T.<br>Hart, TL2   | JN106054,<br>JN106062                           |
| <i>Cercopithecus<br/>lomamiensis</i>               | Central Congo<br>Basin, DRC                             | GP609            | Drs. J. and T.<br>Hart, TL2   | JN106055,<br>JN106063                           |
| <i>Cercopithecus<br/>lomamiensis</i>               | Central Congo<br>Basin, DRC                             | JH005            | Drs. J. and T.<br>Hart, TL2   | JN106056,<br>JN106061                           |
| <i>Cercopithecus<br/>lomamiensis</i>               | Central Congo<br>Basin, DRC                             | ME408            | Drs. J. and T.<br>Hart, TL2   | JN106057,<br>JN106060                           |
| <i>Cercopithecus<br/>mitis</i>                     | Africa                                                  | C.Lehn           | Dr. C. Lehn                   | AY450876,<br>AY899219                           |
| <i>Cercopithecus<br/>mona</i>                      | Grenada                                                 | SA.BF#3          | Dr. M. Glenn/K.<br>Bensen     | AF284281,<br>AY899227                           |
| <i>Cercopithecus<br/>nictitans</i>                 | Central Africa                                          | Newton           | BREC's Baton<br>Rouge Zoo     | AY450878,<br>AY899221                           |

**Table S2.** continued.

| <b>Taxon</b>                           | <b>Origin</b>                  | <b>Sample ID</b> | <b>Source</b>                       | <b>GenBank #<br/>(TSPY, Xq13.3<br/>homolog)</b> |
|----------------------------------------|--------------------------------|------------------|-------------------------------------|-------------------------------------------------|
| <i>Cercopithecus<br/>petaurista</i>    | West Africa                    | 1534             | Central Florida<br>Zoo              | AY897616,<br>AY899224                           |
| <i>Cercopithecus<br/>pogonias</i>      | Gabon                          | 108-G            | CIRMF, Gabon                        | EF517805,<br>AY899229                           |
| <i>Allochrocebus<br/>preussi</i>       | Bioko,<br>Equatorial<br>Guinea | 008-B            | Dr. P. Telfer,<br>WCS               | EF517802,<br>EF517809                           |
| <i>Allochrocebus<br/>solatus</i>       | Gabon                          | Omboe            | CIRMF, Gabon                        | AY450879,<br>AY899218                           |
| <i>Cercopithecus<br/>wolffi</i>        | Central Africa                 | Nguma            | San Antonio Zoo                     | AY450880,<br>AY899228                           |
| <i>Allenopithecus<br/>nigroviridis</i> | Congo                          | R146/97          | National<br>Museum,<br>Scotland     | AF284280,<br>AY899233                           |
| <i>Erythrocebus<br/>patas</i>          | Africa                         | R230,<br>R229    | Dept.<br>Anthropology,<br>CUNY      | AY048064,<br>AY899215                           |
| <i>Miopithecus<br/>talapoin</i>        | Central Africa                 | 1511             | Audubon Zoo                         | EF517806,<br>AY899232                           |
| <i>Macaca mulatta</i>                  | China                          | 20156,<br>19874  | CERC, Columbia<br>University        | AF284259,<br>AY899239                           |
| <i>Papio hamadryas</i>                 | Africa                         | 73.347,<br>18742 | NYU/Southwest<br>Foundation         | AF284277,<br>AY899234                           |
| <i>Theropithecus<br/>gelada</i>        | Ethiopia                       | 891096           | Dept.<br>Anthropology,<br>NYU       | AF284278,<br>AY899236                           |
| <i>Trachypithecus<br/>spp.</i>         | Southeast Asia                 | DJ.1, CBS        | Drs. D.<br>Melnick/C.-B.<br>Stewart | AF284232,<br>EF517811                           |

**Notes:** <sup>a</sup> We did not have a *Cercopithecus erythrogaster* sample for this study. We included a TSPY sequence available on GenBank, but no Xq13 sequence exists for this taxon. <sup>b</sup> Our *Cercopithecus erythrotis* sample is from a female, and therefore does not carry a Y-chromosome.
