# Supplementary material for: Lesula: A New Species of Cercopithecus Monkey Endemic to the Democratic Republic of Congo and Implications for Conservation of Congo’s Central Basin
Source: PLoS One. 2012 Sep 12;7(9):e44271. doi: 10.1371/journal.pone.0044271 (PMC3440422; doi:10.1371/journal.pone.0044271)
Supplement: Table S4 — Comparative craniodental measurements between Cercopithecus lomamiensis and Cercopithecus hamlyni . (PDF) [file pone.0044271.s008.pdf]

**Table S4.** Comparative craniodental measurements between *Cercopithecus lomamiensis* and *Cercopithecus hamlyni*.

| Character                                             | <i>C. lomamiensis</i> (Pooled) |               |                    |   | <i>C. hamlyni</i> (Pooled) |               |                    |   | Significance |
|-------------------------------------------------------|--------------------------------|---------------|--------------------|---|----------------------------|---------------|--------------------|---|--------------|
|                                                       | Mean (mm)                      | Range (mm)    | Size-adjusted Mean | n | Mean (mm)                  | Range (mm)    | Size-adjusted Mean | n | p-value      |
| Posterior occipital length (lambda-inion)             | 15.1                           | 12.1-17.0     | 0.686              | 3 | 11.1                       | 9.2 - 12.8    | 0.510              | 6 | 0.044*       |
| Calvarial shape (biporionic breadth / glabella-inion) | 0.752                          | 0.749 - 0.755 | 0.752              | 3 | 0.792                      | 0.756 - 0.823 | 0.792              | 6 | 0.015*       |
| Inferior occipital length (opisthion-inion)           | 22.7                           | 20.1 - 24.4   | 1.02               | 3 | 24.3                       | 21.7 - 26.2   | 1.12               | 5 | 0.024*       |
| Anterior interorbital breadth (bimaxilliofrontale)    | 6.3                            | 4.3 - 7.3     | 0.283              | 3 | 7.6                        | 6.1 - 8.7     | 0.348              | 6 | 0.039*       |
| Orbit area (max orbit width x max orbit height)       | 582.5                          | 544.9 - 632.3 | 26.2               | 3 | 488.2                      | 434.4 - 535.6 | 22.4               | 7 | 0.023*       |
| Occipital flexion                                     | 150.3                          | 142.9 - 155.9 | 150.3              | 3 | 138.5                      | 134.5 - 151.7 | 138.5              | 7 | 0.087        |
| I <sup>1</sup> area (MD length x BL width)            | 25.8                           | 25.3 - 26.3   | 1.10               | 2 | 18.2                       | 14.6 - 20.9   | 0.843              | 5 | 0.025*       |
| I <sup>2</sup> area (MD length x BL width)            | 13.7                           | 11.9 - 15.5   | 0.58               | 2 | 9.5                        | 9.0 - 9.9     | 0.43               | 6 | 0.273        |
| M <sup>2</sup> area (MD length x BL width)            | 53.8                           | 52.6 - 55.4   | 2.43               | 3 | 41.7                       | 34.8 - 46.9   | 1.90               | 7 | 0.002*       |
| M <sup>3</sup> area (MD length x BL width)            | 42.6                           | 41.6 - 43.6   | 1.81               | 2 | 29.9                       | 26.0 - 34.8   | 1.35               | 6 | 0.000*       |
| I <sub>1</sub> area (MD length x BL width)            | 13.1                           | 10.8 - 14.8   | 0.592              | 3 | 9.9                        | 7.0 - 12.2    | 0.452              | 7 | 0.053        |
| I <sub>2</sub> area (MD length x BL width)            | 13.0                           | 9.5 - 15.1    | 0.576              | 3 | 10.0                       | 8.4 - 12.4    | 0.454              | 5 | 0.068        |
| M <sub>2</sub> area (MD length x BL width)            | 45.9                           | 42.9 - 50.8   | 2.07               | 3 | 36.8                       | 29.4 - 44.1   | 1.68               | 7 | 0.021*       |

**Table S4.** continued.

|                                                       | <i>C. lomamiensis</i> (Males only) |               |                    |   | <i>C. hamlyni</i> (Males only) |               |                    |   | Significance |
|-------------------------------------------------------|------------------------------------|---------------|--------------------|---|--------------------------------|---------------|--------------------|---|--------------|
| Character                                             | Mean (mm)                          | Range (mm)    | Size-adjusted Mean | n | Mean (mm)                      | Range (mm)    | Size-adjusted Mean | n | p-value      |
| Calvarial shape (biporionic breadth / glabella-inion) | 0.752                              | 0.749 - 0.755 | 0.752              | 2 | 0.798                          | 0.756 - 0.823 | 0.798              | 5 | 0.059        |
| Max cranial width (bieuryonic breadth)                | 61.2                               | 60.8 - 61.6   | 2.60               | 2 | 59.6                           | 56.4 - 64.1   | 2.74               | 5 | 0.025*       |
| Orbit area (max orbit width x max orbit height)       | 601.3                              | 570.2 - 632.3 | 25.55              | 2 | 487.79                         | 434.4 - 535.6 | 22.08              | 6 | 0.088        |
| I <sup>1</sup> area (MD length x BL width)            | 25.8                               | 25.3 - 26.3   | 1.10               | 2 | 19.1                           | 17.2 - 20.9   | 0.875              | 4 | 0.015*       |
| I <sup>2</sup> area (MD length x BL width)            | 13.7                               | 11.9 - 15.5   | 0.581              | 2 | 9.5                            | 9.0 - 9.9     | 0.425              | 5 | 0.264        |
| M <sup>2</sup> area (MD length x BL width)            | 54.0                               | 52.6 - 55.4   | 2.29               | 2 | 42.8                           | 39.7 - 46.9   | 1.94               | 6 | 0.002*       |
| M <sup>3</sup> area (MD length x BL width)            | 42.6                               | 41.6 - 43.6   | 1.81               | 2 | 30.6                           | 27.0 - 34.8   | 1.37               | 5 | 0.002*       |

**Notes:** \* = Significant difference at the 0.05 level. Pooled = males and females included together in the analysis. Occipital flexion = angle between opisthion-basion and opisthion-inion. MD = mesiodistal, BL = buccolingual. In order to maximize sample sizes, specimens were included in the analysis if the M3/m3s had begun eruption. Size-adjusted values were obtained by dividing the raw measurements for each specimen by a geometric mean of 41 cranial measurements for each specimen, where applicable. T-tests were performed using the size-adjusted values for each character. *C. hamlyni* specimens analyzed include YPM 17272, YPM 14195, YPM 14194, YPM 14193, AMNH 86948, AMNH 90028, AMNH 81000. *C. lomamiensis* specimens analyzed include YPM 14189, YPM 14080, YPM 14191.
