# Supplementary material for: Lesula: A New Species of Cercopithecus Monkey Endemic to the Democratic Republic of Congo and Implications for Conservation of Congo’s Central Basin
Source: PLoS One. 2012 Sep 12;7(9):e44271. doi: 10.1371/journal.pone.0044271 (PMC3440422; doi:10.1371/journal.pone.0044271)
Supplement: Table S6 — Acoustic parameters measured for each sampled boom. (PDF) [file pone.0044271.s010.pdf]

**Table S6.** Acoustic parameters measured for each sampled boom.

| PARAMETER                  | DESCRIPTION                                                                                                                                         |
|----------------------------|-----------------------------------------------------------------------------------------------------------------------------------------------------|
| Start Freq (Hz)            | Peak frequency during first 10% of signal.                                                                                                          |
| End Freq (Hz)              | Peak frequency during last 10% of signal.                                                                                                           |
| Low freq (Hz)              | Lowest frequency in the signal.                                                                                                                     |
| High freq (Hz)             | Highest frequency in the signal.                                                                                                                    |
| Q1 freq (Hz)               | Peak frequency at time when 25% of signal's energy had past (i.e. at end of the first quarter).                                                     |
| Q3 Freq (Hz)               | Peak frequency at time when 75% of signal's energy had past (i.e. at end of the third quarter).                                                     |
| Center Freq (Hz)           | The frequency dividing signal into 2 frequency intervals of equal energy                                                                            |
| IQR bandwidth (Hz)         | Inter-quartile range bandwidth.                                                                                                                     |
| IQR Dur (secs)             | Inter-quartile range duration: difference between 1st and 3rd quartile times. Provides duration of interval in which 50% of call's energy occurred. |
| Max Freq (Hz)              | The frequency at which maximum power (amplitude) of call occurs.                                                                                    |
| Duration (secs)            | Duration of entire signal.                                                                                                                          |
| *Slope: Total (Hz/sec)     | (End Freq–Start Freq) / Duration                                                                                                                    |
| *Slope: 1st quart (Hz/sec) | (Q1 freq–Start Freq) / duration of first quarter                                                                                                    |
| *Slope: Middle (Hz/sec)    | (Q3 freq–Q1 Freq) / duration of middle half                                                                                                         |
| *Slope: 4th quart (Hz/sec) | (End freq–Q3 Freq) / duration of last quarter                                                                                                       |
| *Delta Freq (Hz)           | Highest frequency minus lowest frequency.                                                                                                           |

**Note:** \* Indicates measure derived from other parameters.
